# Supplementary material for: The scale of zebrafish pectoral fin buds is determined by intercellular K+ levels and consequent Ca2+-mediated signaling via retinoic acid regulation of Rcan2 and Kcnk5b
Source: PLoS Biol. 2024 Mar 25;22(3):e3002565. doi: 10.1371/journal.pbio.3002565 (PMC11018282; doi:10.1371/journal.pbio.3002565)
Supplement: S1 Data — (XLSX) [file pbio.3002565.s001.xlsx]

## Sheet: Fig. 1D
	FLIM-FRET KIRIN1 Sensor 1/Lifetime (ns-1)
	CFP	Ectoderm	Mesenchyme
	0.277778	0.434783	0.347222
	0.25	0.348432	0.343643
	0.27027	0.383142	0.353357
	0.268817	0.483092	0.347222
	0.243902	0.429185	0.355872
	0.25641	0.37594	0.333333
	0.243902	0.414938	0.34965
	0.238095	0.47619	0.358423
	0.208333	0.458716	0.3663
	0.26178	0.404858	0.350877
	0.27027	0.44843	0.374532
	0.271003	0.531915	0.390625
	0.274725	0.460829	0.383142
	0.296736	0.434783	0.37037
	0.243902	0.434783	0.362319
	0.27027	0.429185	0.3861
	0.277778	0.518135	0.341297
	0.263852	0.473934	0.348432
	0.26455	0.389105	0.374532
	0.232558	0.411523	0.357143
	0.263158	0.374532	0.37594
	0.25641	0.33557	0.408163
	0.25641	0.46729	0.374532
	0.27027	0.398406	0.406504
	0.263158	0.363636	0.42735
	0.25641	0.404313	0.408163
	0.268817	0.452148	0.44843
		0.456621	0.389105
		0.375587	0.411523
		0.405405	0.374532
			0.33557
			0.401606
			0.384615
			0.377358
			0.440529
			0.359712
			0.389105
			0.3663
			0.34705
			0.370174
			0.383707
			0.375587
			0.386954

## Sheet: Fig. 1E
1/Lifetime Ectoderm Data												1/Lifetime Data
SD	0.0346117	0.0282112	0.0510667	0.0597306	0.0733483	0.016521	0.0241874	0.0470928	0.0132653	0.0608591		SD	0.0391239	0.0212484	0.0380162	0.0484108	0.0460836	0.0126692	0.015494	0.0256934	0.0145073	0.052294
Average	0.438507	0.510778	0.468996	0.456996	0.438767	0.382957	0.377844	0.397065	0.39134	0.445659		Average	0.390393	0.433128	0.412126	0.380664	0.381359	0.334757	0.3419	0.351393	0.356762	0.418413
Timer point	32	34	35	40	42	46	47	48	54	56		Timepoint	32	34	35	40	42	46	47	48	54	56
Measured	0.38059	0.5	0.526316	0.326797	0.321543	0.37037	0.384615	0.31362	0.4	0.32		Measured	0.344234	0.438596	0.442478	0.319262	0.317628	0.348432	0.324675	0.323625	0.346021	0.312134
Values	0.398936	0.531915	0.487805	0.404313	0.372671	0.384615	0.371747	0.381679	0.384615	0.399361		Values	0.360144	0.458716	0.452489	0.314713	0.331126	0.3125	0.323625	0.319489	0.3367	0.365726
	0.45977	0.529101	0.552486	0.456621	0.329308	0.416667	0.37594	0.37037	0.362319	0.422627			0.351494	0.45045	0.444444	0.353857	0.313644	0.333333	0.321543	0.310973	0.333333	0.391083
	0.569801	0.526316	0.478469	0.375587	0.408163	0.377358	0.36049	0.392157	0.387597	0.463822			0.3663	0.456621	0.454545	0.36036	0.340716	0.316456	0.352113	0.358423	0.37037	0.406872
	0.454545	0.52356	0.5	0.405405	0.327869	0.4	0.432432	0.366972	0.390625	0.400534			0.347947	0.444444	0.462963	0.320256	0.314795	0.346021	0.350877	0.324675	0.357143	0.429492
	0.43573	0.512821	0.483092	0.555556	0.321199	0.363636	0.351185	0.45045	0.395257	0.437956			0.365965	0.440529	0.454545	0.323206	0.311042	0.344828	0.357143	0.344828	0.358423	0.393391
	0.378788	0.530035	0.444444	0.558659	0.339751	0.401606	0.387597	0.388601	0.383142	0.321199			0.34459	0.416667	0.480769	0.319489	0.313152	0.344828	0.332226	0.359712	0.364964	0.406835
	0.458015	0.496278	0.497512	0.515464	0.4329	0.367512	0.393701	0.316456	0.386997	0.394218			0.325581	0.393701	0.421941	0.309917	0.380228	0.31746	0.326797	0.343643	0.357143	0.313316
	0.42735	0.440529	0.491803	0.414938	0.349243	0.380228	0.401606	0.365408	0.39801	0.385109			0.338219	0.414938	0.416667	0.324675	0.330579	0.344828	0.337838	0.357143	0.37037	0.341297
	0.420757	0.5	0.439883	0.442478	0.441176	0.371747	0.346021	0.432277	0.41841	0.397878			0.469484	0.409165	0.41841	0.34705	0.373134	0.328947	0.346021	0.353357	0.340368	0.372439
	0.429185	0.5	0.530035	0.416667	0.497512	0.378788	0.37037	0.35545	0.4	0.547445			0.471698	0.453515	0.407166	0.370174	0.44843	0.332594	0.37037	0.357143	0.373972	0.374298
	0.429185	0.526316	0.491803	0.5	0.595238		0.358423	0.36452	0.389105	0.377834			0.465116	0.4561	0.452489	0.383707	0.430108	0.3465	0.358423	0.348432	0.37234	0.46729
	0.444444	0.555556	0.36452	0.456621	0.488599			0.353774		0.479233			0.40107	0.42735	0.453515	0.375587	0.384862	0.335121	0.332005	0.331345		0.365408
	0.454545	0.478469	0.402145	0.454545	0.502513			0.406504		0.447761			0.42508	0.403226	0.41632	0.386954	0.440529		0.352941	0.362538		0.42735
	0.434783		0.416667	0.384615	0.526316			0.416089		0.461538			0.490196	0.4329	0.462107	0.42735	0.434783			0.353201		0.387597
	0.454545		0.391134	0.401606	0.47619			0.359281		0.547445			0.421348		0.453309	0.469484	0.404858			0.318302		0.393185
	0.434783		0.442478	0.47619	0.47619			0.385604		0.519031			0.39557		0.326584	0.438596	0.425532			0.331126		0.46729
	0.420168		0.326797	0.526316	0.478469			0.444444		0.557621			0.431034		0.362056	0.414938	0.4			0.352941		0.466926
	0.436681		0.350467	0.526316	0.480769			0.491803		0.52356			0.35545		0.371471	0.416667	0.403226			0.326976		0.489396
	0.434783		0.416089	0.510204	0.456621			0.487013		0.47619			0.410397		0.365764	0.4	0.403226			0.353357		0.429185
	0.416667		0.404313	0.425532	0.47619			0.499168		0.478469			0.395648		0.429923	0.401606	0.390625			0.357143		0.429185
	0.440529		0.519031	0.507614	0.490196			0.384615		0.537634			0.393185		0.31211	0.344828	0.384615			0.365186		0.456621
	0.460829		0.483871	0.526316	0.454545			0.4		0.5			0.420168		0.324254	0.357143	0.416667			0.383632		0.485437
	0.465116		0.584795	0.44843	0.46729			0.387597		0.497512			0.39557		0.34626	0.434783	0.425532			0.328048		0.469484
	0.454545		0.454545	0.416667	0.458716			0.4		0.555556			0.357143		0.339213	0.425532	0.414938			0.341103		0.5
	0.434783		0.492611	0.44843				0.409836		0.531915			0.377358		0.4095	0.434783				0.362538		0.454545
	0.409836		0.492611					0.378788		0.606061			0.37037		0.373413	0.4329				0.404585		0.46729
			0.458716							0.483092			0.384615		0.412541	0.438596				0.404858		0.452489
			0.416667							0.49505			0.357143		0.395257	0.438596				0.412088
			0.458716							0.42735			0.37037		0.393701	0.416667				0.383142
			0.456621										0.384615		0.384615	0.423729				0.434783
			0.483092										0.377358		0.416667	0.423729				0.406504
			0.458716										0.367647		0.420168	0.322581				0.4329
			0.460829										0.425532		0.416667	0.322581				0.434783
			0.454545										0.403226		0.411523	0.328947				0.438596
			0.460829										0.413223		0.416667					0.401606
			0.46729										0.387597		0.403226					0.395257
			0.478469										0.363636		0.420168					0.401606
			0.497512										0.4		0.429185					0.434783
			0.434783												0.444444					0.434783
			0.446429												0.390625					0.420168
			0.434783												0.383142					0.434783
			0.534759												0.406504					0.411523
			0.480769												0.4					0.4329
			0.483092												0.404858
			0.529101												0.406504
			0.526316												0.429185
			0.505051												0.420168
			0.540541												0.444444
			0.518135												0.446429
			0.46729												0.436681
															0.442478

## Sheet: Fig. 1 F
	Pectoral Fin bud area µm2
	30 hpf	32 hpf	34 hpf	36hpf	40 hpf	44 hpf	48 hpf	52 hpf	54 hpf	56 hpf
	551.926	699.762	680.173	1165.99	1963.57	1530.95	1861.35	2173.47	2591.94	2600.14
	554.919	954.89	666.117	1068.77	1299.88	1602.29	2052.52	2053.48	2314.18	2905.26
	642.286	740.525	542.735	1246.5	1006.96	1602.29	2076.88	1721.15	3613.22	3510.76
	727.779	258.212	896.94	1007.13	1243.79	1926.13	1725.48	2176.92	3014.98	3291.62
	696.953	418.841	814.022	830.16	1636.35	1511.39	1518.28	2100.4	2445.6	2101.69
	662.757	471.904	613.079	1304.25	1222.32	1422.16	2278.9	2124.59	2786.19	1931.79
	365.12	573.804	625.564	946.46	1402.83	1982.81	1719.16	1949.55	2617.55	2263.95
	666.787	554.623	638.475	1207.98	1628.97	1934.59	1519	1832.54	2106	2453.24
	433.543	501.518	429.939	780.361	1490.23	1658.36	1786.88	2184.04	2026.16	2118.72
	384.792	723.239	323.069	1313.65	1099.65	1918.33	1894.44	2217.49	2509.97	2124.01
	423.643	795.746	552.556	1118.91	1345.32	1323.76	1667.79	2220.24	2883.03	2462.36
	343.486	536.692	489.77	1514.11	1371.58	1202.23	1599.04	2345.29	3131.05	2391.49
	557.06	512.851	365.638	1094.95	1266.89	1991.25	1838.09	2522.89	2232.66	2696.65
	774.732	754.33	491.005	1150.95	1258.22	1296.13	1981.59	2048.12	2077.79	2440.92
	670.805	708.414	634.77	920.915	1510.62	1668.09	1552.64	2280.8	3344.92	3307.36
	265.559	487.57	347.871	869.95	1563.02	1127.61	1669.4	2462.35	1653.48	3426.49
	233.609	567.865	530.48	864.735	1111.11	1089.53	1823.15	2127.98	2883.04	3068.4
	327.462	791.094	700.312	831.95	1497	1121.85	1267.59	1855.11	2447.26
	491.61	484.683	492.819	1212.91	1186.96	1311.02	1989.46	2122.74	1660.6
	290.37	760.622	547.346	1199.96	1326.98	1461.49	1461.11	2166.35	1764.12
	243.334	340.039	493.197	1249.66	1462.28	1962.56	1518.45	2196.88	2181.27
	131.618	723.239	358.504	1285.65	1693.42	1219.61	1926.68	2250.51	3110.81
	246.834	795.746	540.835	984.139	1133.96	1640.19	1988.54		2597.68
	360.608	536.692	471.571	974.691	854.632		1806.71		2136.17
	287.633	512.851	783.739	823.781	1832.84		1895.7		2840.23
	475.679	754.33	725.987	830.33	1197.57		1720.79
	307.104	708.414	409.296	791.649	1254.57		2192.02
	204.226	487.57	518.25	863.101	1142.57		1663.6
	243.268	567.865	695.862	1190.78			1697.19
	159.016	791.094	613.739	999.894			1544.54
	151.028	484.683	490.056	1003.19			1877.61
	326.618	760.622	825.204	856.096			2027.03
	254.037	340.039	685.284	885.831			1838.47
	266.182	389.599	480.68	881.951
	301.675	442.15	504.829	829.431
		434.522	556.9	913.016
		688.765	585.097	799.402
		519.775	352.49	1022.58
		609.619	569.726	965.487
		720.588	491.71	913.609
		675.6	647.658
		801.372	510.105
		731.981	436.743
		541.572	591.956
		473.611	417.872
			390.712
			803.451
			536.432
			487.425
			637.729
			581.884
			376.015
			477.633
			446.508
			475.777
			773.707
			675.635
			933.699
			559.956
			828.508
			643.375
			820.111
			867.593
			1147.56
			1459.85
			770.469
			928.092
			767.343
			1026.15
			929.436
			794.478
			776.148
			1094.21
			876.607
			791.89
			979.55
			807.537
			993.511

## Sheet: Fig. 1M
1/Lifetime
mcherry	near mCherry	kcnk5b	near kcnk5b
0.367647	0.431034	0.324675	0.357143
0.393701	0.322581	0.333333	0.344828
0.384615	0.446429	0.332226	0.333333
0.416667	0.355872	0.344828	0.344828
0.404858	0.326797	0.343643	0.322581
0.380228	0.392157	0.333333	0.344828
0.392157	0.373134	0.357143	0.322581
0.393701	0.384615	0.3367	0.346021
0.4	0.357143	0.3003	0.322581
0.344828	0.384615	0.277778	0.276243
0.357143	0.5	0.344828	0.3367
0.352113	0.353357	0.333333	0.322581
0.347222	0.37037	0.416667	0.344828
0.323625	0.37594	0.390625	0.3125
0.333333	0.37037	0.333333	0.384615
0.344828	0.364964	0.323625	0.325733
0.393701	0.387597	0.295858	0.357143
0.344828	0.4	0.277778	0.322581
0.357143		0.333333	0.344828
0.384615		0.362319	0.333333
0.381679		0.333333	0.384615
0.381679		0.3125	0.37037
0.4		0.324675	0.327869
0.392157		0.344828	0.326797
0.390625		0.357143	0.319489
0.378788		0.357143
0.377358		0.342466
0.37037		0.325733
0.384615		0.333333
0.384615		0.332226
0.384615		0.30303
0.383142		0.344828
0.384615
0.401606
0.4
0.404858
0.390625
0.384615
