# Supplementary material for: The scale of zebrafish pectoral fin buds is determined by intercellular K+ levels and consequent Ca2+-mediated signaling via retinoic acid regulation of Rcan2 and Kcnk5b
Source: PLoS Biol. 2024 Mar 25;22(3):e3002565. doi: 10.1371/journal.pbio.3002565 (PMC11018282; doi:10.1371/journal.pbio.3002565)
Supplement: S3 Data — (XLSX) [file pbio.3002565.s003.xlsx]

## Sheet: Fig. 3C
	FLIM-FRET KIRIN1 1/Lifetime
	DMSO	RA
	0.384123	0.334448
	0.361446	0.326264
	0.37594	0.322581
	0.353774	0.320513
	0.362319	0.330033
	0.346821	0.346821
	0.342466	0.331858
	0.327511	0.319489
	0.321027	0.330396
	0.32	0.348028
	0.321027	0.331126
	0.3125	0.324324
	0.334821	0.321199
	0.326442	0.321888
	0.331126	0.313807
	0.32538	0.313152
	0.307692	0.310559
	0.333333	0.30581
	0.31746	0.3125
	0.31348	0.308642
	0.344828	0.316957
	0.325733	0.327332
	0.324675	0.321543
	0.307692	0.30722
	0.344828	0.31348
	0.350877	0.322581
	0.353357	0.312989
	0.322581	0.3125
	0.353357	0.320513
	0.348432	0.316456
	0.338983	0.319489
	0.350877	0.314465
	0.357143	0.338983
	0.334448	0.344828
	0.380228	0.336134
	0.348432	0.33557
	0.344828	0.3367
	0.362319	0.330033
	0.344828	0.341297
	0.353357	0.337268

## Sheet: Fig. 3D
	FLIM-FRET KIRIN1 1/Lifetime
	DSMO -Ectoderm	Retinoic Acid -Ectoderm	DSMO -Mesoderm	Retinoic Acid -Mesoderm
	0.383142	0.374532	0.322581	0.294118
	0.367647	0.37037	0.330033	0.333333
	0.369004	0.344828	0.326797	0.30303
	0.357143	0.377358	0.3125	0.333333
	0.333333	0.358423	0.333333	0.322581
	0.341297	0.374532	0.322581	0.333333
	0.395257	0.384615	0.377358	0.30303
	0.371747	0.384615	0.357143	0.322581
	0.454545	0.357143	0.367647	0.3125
	0.408163	0.30303	0.333333	0.30303
	0.416667	0.3125	0.333333	0.344828
	0.5	0.37037	0.357143	0.333333
	0.46729	0.322581	0.346021	0.306748
	0.454545	0.3003	0.3663	0.3125
	0.374532	0.327869	0.357143	0.285714
	0.357143	0.253165	0.3125	0.322581
	0.357143	0.387597	0.3125	0.319489
	0.416667	0.322581	0.384615	0.318471
	0.357143	0.321543	0.322581	0.306748
	0.357143	0.343643	0.30303	0.309598
	0.4	0.37037	0.322581	0.3125
	0.357143	0.42735	0.344828	0.322581
	0.384615	0.344828	0.322581	0.294118
	0.37037	0.4	0.333333	0.277778
	0.333333	0.333333	0.333333	0.31348
	0.333333	0.322581	0.333333	0.333333
	0.344828	0.357143	0.333333	0.333333
	0.3125	0.333333	0.322581	0.30303
	0.34965	0.294118	0.3125	0.322581
	0.322581		0.322581	0.333333
	0.337838		0.324675	0.294118
	0.322581		0.309598	0.277778
	0.319489		0.318471	0.294118
	0.322581		0.326797	0.30303
	0.328947		0.306748
	0.42735		0.294118
	0.344828		0.30303
	0.384615		0.30581
	0.37037		0.321543
	0.362319		0.344828
	0.37594		0.344828
	0.322581		0.344828
	0.3125		0.294118
	0.311526		0.30303
			0.285714
			0.3003

## Sheet: Fig. 3H
	rcan2 expression qRT-PCR				rcan2	dmso	CT	CT mean	delta CT mean		RA	CT	CT mean	delta CT mean	delta CT	minus delta CT	fold change
	DMSO treated	RA treated			Experimental Group 1	b-actin	30.7596	30.4203				32.5599	32.4387
	1	4.76605					30.4758					32.6945
	1	6.87251					30.0255					32.0616
	1	5.28747				rcan2	29.2105	28.886	-1.53432			28.7727	28.4256	-3.78712	-2.25279	2.25279	4.76605
	1	1.36488					28.9218					28.3794		-4.31516	-2.78084	2.78084	6.87251
	1	1.42054					28.5256					28.1247		-3.9369	-2.40258	2.40258	5.28747
	1	1.69514			Experimental Group 2	b-actin	26.7507	26.3481				27.2124	27.1201
	1	3.88566					26.2402					26.9995
	1	6.41235					26.0533					27.1485
	1	3.61046				rcan2	31.7579	32.6263	6.27822			32.9496	32.8261	5.82945	-0.448772	0.448772	1.36488
							33.1696					32.8919		5.77178	-0.506443	0.506443	1.42054
							32.9514					32.6369		5.51682	-0.761402	0.761402	1.69514
					Experimental Group 3	b-actin	16.0944	16.0656				19.0149	18.9094
							15.9314					18.708
							16.171					19.0052
						rcan2	25.6075	25.8625	9.79683			26.748	26.5424	7.83867	-1.95816	1.95816	3.88566
							25.9685					26.0253		7.11598	-2.68085	2.68085	6.41235
							26.0114					26.854		7.94464	-1.85218	1.85218	3.61046

## Sheet: Fig. 3M
	Fin bud-to-Eye Area Ratios
	Non-Tg	mCherry	rcan2- mCherry		Non-Tg	fin area/um2	eye area	fin area/eye area		mCherry	fin area/um2	eye area	fin area/eye area		rcan2- mCherry	fin area/um2	eye area	fin area/eye area
	0.140953	0.149549	0.185887		1	2807.74	19919.7	0.140953		1	2350.27	15715.8	0.149549		fish1	3900.49	26124.8	0.149302
	0.139831	0.132856	0.1832		2	2430.06	17378.5	0.139831		2	1848.06	13910.3	0.132856		fish2	3199.3	17211	0.185887
	0.126641	0.16226	0.188201		3	2179.84	17212.7	0.126641		3	2533.96	15616.6	0.16226		fish3	2827.01	21202.4	0.133334
	0.130344	0.160863	0.18982		4	2610.44	20027.2	0.130344		4	2878.93	17896.9	0.160863		fish4	3804.8	20768.6	0.1832
	0.141132	0.213551	0.206757		5	2986.81	21163.2	0.141132		5	3182.15	14901.1	0.213551		fish5	3963.51	21060	0.188201
	0.164378	0.209709	0.152869		6	2845.91	17313.2	0.164378		6	3469.97	16546.6	0.209709		fish6	2832.78	14923.5	0.18982
	0.187475	0.17961	0.152379		7	2672.27	14254	0.187475		7	2459.62	13694.2	0.17961		fish7	3681.37	17805.3	0.206757
	0.126965	0.146428	0.144129		8	2378.55	18733.9	0.126965		8	1744.92	11916.6	0.146428		fish8	2613.18	17094.2	0.152869
	0.148117	0.205191	0.139836		9	2629.06	17749.9	0.148117		9	2996.08	14601.4	0.205191		fish9	4180.77	27436.8	0.152379
	0.121736	0.160256	0.234601		10	2150.63	17666.4	0.121736		10	2355.69	14699.5	0.160256		fish10	2802.91	19447.2	0.144129
	0.235366	0.168609	0.243418		11	3326.41	14133	0.235366		11	2284.92	13551.6	0.168609		fish11	3223.11	23049.3	0.139836
	0.145232	0.219123	0.175095		12	2506.35	17257.6	0.145232		12	2820.91	12873.7	0.219123		fish12	4478.58	19090.2	0.234601
	0.162338	0.192501	0.199753		13	2467.3	15198.5	0.162338		13	2660.02	13818.2	0.192501		fish13	3309.25	13595	0.243418
	0.209565	0.168654	0.167006		14	2900.41	13840.2	0.209565		14	2347.9	13921.4	0.168654		fish14	3371.57	19255.7	0.175095
	0.174014	0.143759	0.183943		15	2702.63	15531.1	0.174014		15	1819.99	12659.9	0.143759		fish15	3757.58	18811.1	0.199753
	0.233546	0.207868	0.129001		16	2543.67	10891.5	0.233546		16	2631.59	12659.9	0.207868		fish17	2369.4	14187.5	0.167006
	0.181078	0.162263	0.172782		17	2598.58	14350.6	0.181078		17	2178.54	13426	0.162263		fish18	3023.82	16438.9	0.183943
	0.139209	0.209332	0.186843		18	2193.05	15753.7	0.139209		18	2918.21	13940.5	0.209332		fish19	2466.78	19122.2	0.129001
	0.209654	0.214966	0.233354		19	3755.12	17911.1	0.209654		19	3407.95	15853.4	0.214966		fish20	3358.13	19435.7	0.172782
	0.169938	0.115129	0.166366		20	2700.52	15891.2	0.169938		20	1629.54	14154	0.115129		fish21	3126.89	16735.4	0.186843
	0.162003	0.197678	0.168203		21	2335.45	14416.1	0.162003		21	2685.83	13586.9	0.197678		fish22	2348.43	17610.4	0.133354
	0.142896	0.121381	0.208943		22	2547.52	17827.8	0.142896		22	1525.12	12564.8	0.121381		fish23	2482.84	14923.9	0.166366
	0.20642	0.14506	0.235324		23	3033.58	14696.2	0.20642		23	2031.04	14001.3	0.14506		fish24	2781.43	16536.1	0.168203
	0.130433	0.166022	0.207511		24	2044.74	15676.5	0.130433		24	2266.98	13654.7	0.166022		fish1	2248.49	10761.3	0.208943
	0.248054	0.173847	0.228656		25	3149.49	12696.8	0.248054		25	2435.58	14009.9	0.173847		fish2	4088.59	17374.2	0.235324
	0.17473	0.19864	0.186567		26	2445.47	13995.7	0.17473		26	2626.53	13222.5	0.19864		fish3	2220.13	10698.8	0.207511
	0.152592	0.164329	0.252304		27	2167.2	14202.6	0.152592		27	2505.69	15248	0.164329		fish4	2698.13	11799.9	0.228656
	0.194238	0.216255	0.201631		28	2897.06	14915	0.194238		28	3309.86	15305.4	0.216255		fish5	2288.22	12264.9	0.186567
	0.185501		0.170239		29	3362.61	18127.2	0.185501							fish6	2716.73	10767.7	0.252304
	0.160733		0.187932		30	2426.83	15098.6	0.160733							fish7	3796.52	18829.1	0.201631
	0.208182		0.179448		31	3659.13	17576.6	0.208182							fish8	3808.67	22372.5	0.170239
	0.152644		0.253144		32	2337.57	15313.9	0.152644							fish9	3138.08	16698	0.187932
	0.172304		0.183447		33	2280.18	13233.4	0.172304							fish10	3867.68	21553.2	0.179448
	0.131701		0.193075		34	2261.37	17170.5	0.131701							fish11	4198.46	16585.2	0.253144
	0.133487		0.128575		35	2392.01	17919.4	0.133487							fish12	1953.06	10646.5	0.183447
	0.192344		0.188015		36	2922.18	15192.5	0.192344							fish13	1931.18	10002.2	0.193075
	0.200132		0.198136		37	3194.17	15960.4	0.200132							fish14	1812.02	14093.1	0.128575
	0.174951		0.261961		38	2802.98	16021.5	0.174951							fish15	2172.97	11557.4	0.188015
	0.208995		0.157615		39	3001.43	14361.2	0.208995							fish16	2384.49	12034.6	0.198136
	0.237652		0.188552		40	2466.26	10377.6	0.237652							fish17	2713.82	10359.6	0.261961
	0.21076		0.239104		41	2795.13	13262.2	0.21076							fish18	2389.4	15159.7	0.157615
	0.195739		0.218619		42	2550.19	13028.5	0.195739							fish19	2912.7	15447.8	0.188552
	0.152259		0.186275		43	2186.34	14359.3	0.152259							fish20	3161.96	13224.2	0.239104
	0.155993		0.253232		44	2019.38	12945.3	0.155993							fish21	3290.89	15053	0.218619
	0.175276		0.195649		45	2367.91	13509.6	0.175276							fish22	2875.19	15435.2	0.186275
	0.225884		0.218422		46	2530	11200.4	0.225884							fish23	3008.43	11880.1	0.253232
	0.195433		0.178557		47	2258.42	11556	0.195433							fish24	3757.17	19203.6	0.195649
	0.189124		0.237675		48	3264.59	17261.6	0.189124							fish25	2934.89	13436.8	0.218422
	0.165984		0.218464		49	2135.86	12867.9	0.165984							fish26	3146.59	17622.3	0.178557
	0.203742		0.170778		50	1839.45	9028.33	0.203742							fish27	2368.67	9966.01	0.237675
	0.171807		0.221969		51	2002.88	11657.7	0.171807							fish28	3219.76	14738.1	0.218464
	0.134612		0.160646		52	1420.01	10548.9	0.134612							fish29	2258.97	13227.5	0.170778
	0.18124		0.214802		53	1834.78	10123.4	0.18124							fish30	2804.33	12633.9	0.221969
	0.127304		0.19617		54	1629.95	12803.5	0.127304							fish31	2209.75	13755.4	0.160646
	0.190138		0.184538		55	2106.08	11076.6	0.190138							fish32	3330.68	15505.8	0.214802
	0.122428		0.139152		56	1351.86	11042.1	0.122428							fish33	2955.9	15068.1	0.19617
	0.140708		0.167707		57	1645.66	11695.5	0.140708							fish34	3058	16571.1	0.184538
	0.132514		0.195922		58	1589.32	11993.6	0.132514							fish35	1903.47	13679	0.139152
	0.13037		0.126125		59	1578.13	12105	0.13037							fish36	2405.04	14340.8	0.167707
	0.22196		0.169203		60	2080.41	9372.91	0.22196							fish37	3268.2	16681.1	0.195922
	0.236591		0.200867		61	2756.41	11650.6	0.236591							fish38	2126.34	16859	0.126125
	0.248876		0.242976		62	3575.9	14368.2	0.248876							fish39	2312.99	13669.9	0.169203
	0.188799		0.188568		63	2106.97	11159.8	0.188799							fish40	2689.63	13390.1	0.200867
	0.217669		0.233203		64	3656.68	16799.2	0.217669							fish41	3724.61	15329.1	0.242976
	0.186957		0.214227		65	2544	13607.4	0.186957							fish42	2956.2	15677.1	0.188568
	0.192277		0.178801		66	2510.2	13055.1	0.192277							fish43	2912.69	12489.9	0.233203
	0.149782		0.212189		67	2154.41	14383.7	0.149782							fish44	2910.14	13584.4	0.214227
	0.192732		0.286203		68	2227.81	11559.1	0.192732							fish45	3306.61	18493.2	0.178801
	0.134868		0.14958		69	1724.17	12784.1	0.134868							fish46	2552.05	12027.3	0.212189
	0.192308		0.234433		70	2858.8	14865.7	0.192308							fish47	3603.6	12591.1	0.286203
	0.171668		0.252433		71	2164.58	12609.1	0.171668							fish48	2236.53	14952	0.14958
	0.202835		0.196374		72	2150.32	10601.3	0.202835							fish49	3959.91	16891.5	0.234433
	0.20464		0.173223		73	2782.7	13598	0.20464							fish50	3599.84	14260.6	0.252433
	0.168117		0.218364		74	2073.85	12335.8	0.168117							fish51	2053.4	10456.6	0.196374
			0.164953												fish52	2741.45	15826.1	0.173223
			0.252017												fish53	3189.55	14606.5	0.218364
			0.211569												fish54	2479.16	15029.5	0.164953
			0.186322												fish55	3588.41	14238.7	0.252017
			0.290394												fish56	3667.3	17333.8	0.211569
			0.206125												fish57	2652.98	14238.7	0.186322
			0.233956												fish58	4629.16	15941	0.290394
			0.228189												fish1	1298.75	12531.8	0.103636
			0.197546												fish2	1467.08	10950.6	0.133973
			0.177925												fish3	1745.63	13201	0.132235
			0.160745												fish4	1400.29	11058.3	0.126628
			0.151824												fish5	2938.41	14255.5	0.206125
			0.174069												fish6	2046.7	8748.24	0.233956
			0.173318												fish7	2216.06	9711.53	0.228189
			0.162971												fish8	2723.86	13788.5	0.197546
			0.141791												fish9	1832.2	10297.6	0.177925
			0.207014												fish10	1976.44	12295.5	0.160745
			0.253657												fish11	1779.08	11718	0.151824
			0.19197												fish12	2183.46	12543.7	0.174069
			0.236523												fish13	2199.11	12688.3	0.173318
			0.352342												fish14	2245.81	13780.4	0.162971
			0.185785												fish15	1895.15	13365.8	0.141791
															fish16	2377.88	11486.5	0.207014
															fish17	1371.99	9691.85	0.141561
															fish18	1855.82	12963	0.143164
															fish19	3483.82	13734.4	0.253657
															fish20	2021.42	10529.9	0.19197
															fish21	1493.87	10942.2	0.136523
															fish22	3623.8	10284.9	0.352342
															fish23	2297.79	12368	0.185785
															fish24	1418.89	10605.5	0.133788

## Sheet: Fig. 3O
	FLIM-FRET KIRIN1 measurements 1/Lifetime
	Non-tg	mCherry	rcan2- mCherry
	0.416667	0.446429	0.421941
	0.444444	0.44843	0.425532
	0.416667	0.454545	0.384615
	0.342466	0.44843	0.406504
	0.444444	0.440529	0.373134
	0.416667	0.393701	0.408163
	0.364964	0.383142	0.37037
	0.357143	0.4	0.384615
	0.357143	0.431034	0.371747
	0.343643	0.41841	0.344828
	0.34965	0.41841	0.392157
	0.414938	0.416667	0.346021
	0.414938	0.392157	0.37037
	0.416667	0.408163	0.344828
	0.429185	0.403226	0.344828
	0.425532	0.389105	0.337838
	0.416667	0.357143	0.373134
	0.393701	0.358423	0.338983
	0.393701	0.357143	0.348432
	0.396825	0.333333	0.350877
		0.338983	0.333333
		0.346021	0.346021
			0.340136

## Sheet: Fig. 3S
		Fin bud-to-eye Area Ratios
		rcan2 EV	rcan2 KO	rcan2 KO +mCherry	rcan2 KO + rcan2 mRNA*			rcan2 EV	fin bud area/um2	eye area/area2	fin area/eye area		rcan2 KO	fin bud area/um2	eye area/area2	fin area/eye area		rcan2 KO +mCherry	fin bud area/um2	eye area/area2	fin area/eye area		rcan2 KO + rcan2 mRNA*	fin bud area/um2	eye area/area2	fin area/eye area
		0.187205	0.178214	0.145691	0.126217			fish1-1	2046.12	10929.9	0.187205		fish1-1	1630.16	9147.24	0.178214		fish1-1	902.115	6191.96	0.145691		fish2-1	1339.45	10612.3	0.126217
		0.19466	0.144161	0.148486	0.239461			fish1-2	2085.94	10715.8	0.19466		fish1-2	1309.64	9084.6	0.144161		fish1-2	1082.51	7290.31	0.148486		fish2-2	1966.62	8212.67	0.239461
		0.192094	0.121103	0.0848467	0.368449			fish2-1	1916.72	9978.03	0.192094		fish2-1	1060.63	8758.08	0.121103		fish2-1	658.081	7756.12	0.0848467		fish1-1	3059.27	8303.11	0.368449
		0.23999	0.159342	0.106612	0.226629			fish2-2	2565.8	10691.3	0.23999		fish3-1	1358.4	8525.03	0.159342		fish2-2	806.677	7566.47	0.106612		fish2-1	2609.18	11513	0.226629
		0.260168	0.126349	0.0972501	0.208117			fish1-1	2633	10120.4	0.260168		fish3-2	1092.86	8649.59	0.126349		fish3-1	798.874	8214.63	0.0972501		fish2-2	2303.62	11068.9	0.208117
		0.190462	0.102375	0.0699338	0.187275			fish1-2	1962.84	10305.7	0.190462		fish4-1	899.532	8786.6	0.102375		fish3-2	585.714	8375.27	0.0699338		fish3-1	1823.53	9737.21	0.187275
		0.177029	0.0755248	0.105916	0.160963			fish2-1	1629.23	9203.22	0.177029		fish4-2	701.053	9282.42	0.0755248		fish4-1	992.656	9372.13	0.105916		fish3-2	1658.91	10306.2	0.160963
		0.123475	0.116138	0.120037	0.225761			fish2-2	1077.04	8722.78	0.123475		fish5-1	1020.29	8785.19	0.116138		fish6-1	864.936	7205.55	0.120037		fish4-1	2218.23	9825.57	0.225761
		0.167592	0.104497	0.0984778	0.285135			fish3-1	1460.46	8714.33	0.167592		fish5-2	974.408	9324.78	0.104497		fish6-2	903.438	9174.02	0.0984778		fish4-2	2594.64	9099.68	0.285135
		0.210873	0.0973211	0.128534	0.163038			fish3-2	1919.25	9101.46	0.210873		fish6-1	984.566	10116.7	0.0973211		fish7-1	1324.12	10301.7	0.128534		fish5-1	1673.85	10266.6	0.163038
		0.249994	0.105624	0.158841	0.264014			fish4-1	2010.48	8042.1	0.249994		fish6-2	1141.85	10810.6	0.105624		fish7-2	1524.49	9597.56	0.158841		fish5-2	2166.66	8206.6	0.264014
		0.236118	0.0856418	0.168761	0.234239			fish4-2	1933.85	8190.17	0.236118		fish7-1	731.567	8542.17	0.0856418		fish8-1	1365.41	8090.81	0.168761		fish1-1	2756.45	11767.7	0.234239
		0.206799	0.0909051	0.172519	0.209106			fish5-1	2492.44	12052.5	0.206799		fish7-2	864.108	9505.61	0.0909051		fish8-2	1591.74	9226.45	0.172519		fish1-2	2611.51	12489	0.209106
		0.163075	0.0998601	0.187618	0.169999			fish6-1	1892.5	11605.1	0.163075		fish8-1	817.228	8183.73	0.0998601		fish9-1	2036.87	10856.5	0.187618		fish2-1	1990.72	11710.2	0.169999
		0.149312	0.129667	0.181205	0.189401			fish6-2	1733.24	11608.2	0.149312		fish8-2	917.516	7075.92	0.129667		fish9-2	1877.28	10360	0.181205		fish2-2	2181.49	11517.8	0.189401
		0.207529	0.164684	0.107193	0.226835			fish7-1	2163.82	10426.6	0.207529		fish10-1	1491.61	9057.42	0.164684		fish10-1	769.718	7180.7	0.107193		fish3-1	2511.56	11072.2	0.226835
		0.240485	0.134171	0.0617212	0.248524			fish7-2	2531.35	10526	0.240485		fish10-2	1157.43	8626.55	0.134171		fish11-1	464.505	7525.86	0.0617212		fish3-2	2891.04	11632.9	0.248524
		0.248999	0.119767	0.0823091	0.19243			fish8-1	2156.26	8659.71	0.248999		fish11-1	940.396	7851.88	0.119767		fish11-2	623.477	7574.82	0.0823091		fish4-1	1829.76	9508.67	0.19243
		0.282295	0.110552	0.0966717	0.185175			fish8-2	2021.49	7160.91	0.282295		fish11-2	989.421	8949.83	0.110552		fish12-1	815.007	8430.67	0.0966717		fish4-2	1748.7	9443.48	0.185175
		0.252439	0.145619	0.0554265	0.169275			fish9-1	2182.08	8644	0.252439		fish12-1	1092.86	7504.88	0.145619		fish13-1	565.179	10196.9	0.0554265		fish5-1	1809.74	10691.1	0.169275
		0.343753	0.165378	0.1455	0.199247			fish9-2	2945.95	8569.95	0.343753		fish12-2	1627.27	9839.72	0.165378		fish14-1	1201.73	8259.33	0.1455		fish5-2	2018.66	10131.4	0.199247
		0.220112	0.0891396	0.141093	0.27564			fish10-1	2125.19	9655.05	0.220112		fish14-1	749.585	8409.11	0.0891396		fish15-1	974.65	6907.87	0.141093		fish6-1	1877.07	6809.86	0.27564
		0.188579	0.102453	0.167065	0.243945			fish10-2	1916.1	10160.7	0.188579		fish14-2	819.022	7994.16	0.102453		fish16-1	1074.07	6429.03	0.167065		fish6-2	1597.5	6548.62	0.243945
		0.201894	0.0907989	0.143496	0.167063			fish11-1	2010.86	9959.99	0.201894		fish15-1	831.403	9156.54	0.0907989		fish17-1	1244.43	8672.26	0.143496		fish7-1	1977.24	11835.3	0.167063
		0.145975	0.077242	0.146376	0.185701			fish11-2	1406.75	9636.92	0.145975		fish15-2	747.042	9671.45	0.077242		fish17-2	992.266	6778.87	0.146376		fish7-2	2164.89	11657.9	0.185701
		0.20026	0.180825	0.108867	0.174719			fish12-1	1914.76	9561.41	0.20026		fish1-1	1479.01	8179.23	0.180825		fish18	897.615	8245.08	0.108867		fish8-1	1637.98	9374.99	0.174719
		0.181724	0.204252	0.118021	0.181176			fish12-2	1776.64	9776.58	0.181724		fish1-2	1331.85	6520.61	0.204252		fish19	907.589	7690.05	0.118021		fish8-2	1722.24	9505.9	0.181176
		0.198298	0.130156	0.0915701	0.241743			fish13-1	2257.64	11385.1	0.198298		fish2-1	1047.45	8047.65	0.130156		fish20-1	626.909	6846.22	0.0915701		fish9-1	2626.05	10863	0.241743
		0.168936	0.108231	0.138485	0.205564			fish13-2	1859.28	11005.8	0.168936		fish2-2	797.142	7365.17	0.108231		fish20-2	983.422	7101.27	0.138485		fish9-2	2180.01	10605	0.205564
		0.224527	0.174108	0.0974057	0.208122			fish14-1	2226.39	9915.93	0.224527		fish3-1	1648.84	9470.23	0.174108		fish21-1	788.086	8090.76	0.0974057		fish10-1	2424.4	11648.9	0.208122
		0.231861	0.129379	0.113085	0.201354			fish14-2	2171.81	9366.87	0.231861		fish3-2	1145.18	8851.33	0.129379		fish21-2	952.159	8419.84	0.113085		fish10-2	2298.51	11415.3	0.201354
		0.191336	0.23502	0.109058	0.206213			fish15-1	1995.65	10430.1	0.191336		fish7-1	1554.89	6616.02	0.23502		fish22-1	847.081	7767.28	0.109058		fish11-1	1912.39	9273.89	0.206213
		0.213519	0.164653	0.0750295	0.159243			fish15-2	2074.31	9714.86	0.213519		fish7-2	1259.67	7650.49	0.164653		fish22-2	595.776	7940.56	0.0750295		fish11-2	1503.82	9443.57	0.159243
		0.165665	0.170878	0.0974803	0.219934			fish16-1	1633.26	9858.79	0.165665		fish8-1	1239.5	7253.72	0.170878		fish23-1	730.265	7491.41	0.0974803		fish13-1	2219.88	10093.4	0.219934
		0.192792	0.147332	0.100443	0.244031			fish16-2	1831.84	9501.67	0.192792		fish10-1	1070.18	7263.7	0.147332		fish23-2	787.532	7840.61	0.100443		fish13-2	2304.47	9443.35	0.244031
		0.248989	0.165481	0.101716	0.125821			fish17-1	2507.26	10069.8	0.248989		fish10-2	1111.23	6715.16	0.165481		fish24	775.029	7619.57	0.101716		fish14-1	1112.54	8842.28	0.125821
		0.205143	0.194362	0.268647	0.165934			fish17-2	2082.56	10151.7	0.205143		fish11-1	1261.46	6490.25	0.194362		fish1-1	2004.02	7459.66	0.268647		fish14-2	1445.88	8713.56	0.165934
		0.170013	0.178341	0.228687	0.159119			fish18-1	1645.74	9680.06	0.170013		fish11-2	1264.14	7088.34	0.178341		fish1-2	1733.86	7581.8	0.228687		fish15-1	2046.14	12859.2	0.159119
		0.179013	0.157044	0.248997	0.14068			fish18-2	1756.57	9812.54	0.179013		fish12-1	1014.63	6460.78	0.157044		fish2-1	2108.32	8467.25	0.248997		fish16-1	1335.54	9493.47	0.14068
		0.19443	0.186895	0.196873	0.182527			fish19-1	1848.36	9506.57	0.19443		fish12-2	1216.63	6509.67	0.186895		fish2-2	2546.86	8689.22	0.293106		fish16-2	1748.73	9580.69	0.182527
		0.200079	0.0965091	0.182934	0.146073			fish19-2	1939.82	9695.31	0.200079		fish13-1	939.93	9739.29	0.0965091		fish3-1	1515.71	7698.89	0.196873		fish17-1	1462.18	10009.9	0.146073
		0.224745	0.138116	0.240514	0.188312			fish20-1	2340.95	10416	0.224745		fish13-2	1104.29	7995.35	0.138116		fish3-2	1371.38	7496.58	0.182934		fish17-2	1781.79	9461.94	0.188312
		0.19344	0.207701	0.211638	0.242592			fish20-2	2018.32	10433.8	0.19344		fish14-1	1664.12	8012.06	0.207701		fish4-1	2206.64	9174.66	0.240514		fish18-1	2328.84	9599.81	0.242592
		0.259396	0.17276	0.205361	0.183401			fish21-1	2339.71	9019.84	0.259396		fish15-1	1254.38	7260.82	0.17276		fish5-1	1818.95	8594.62	0.211638		fish18-2	1872.92	10212.2	0.183401
		0.227519	0.128607	0.159847	0.194997			fish21-2	2092.19	9195.7	0.227519		fish15-2	896.906	6974	0.128607		fish5-2	1796.93	8750.11	0.205361		fish20-1	1430.23	7334.66	0.194997
		0.18314	0.152607	0.172209	0.236614			fish23-1	2027.37	11070.1	0.18314		fish3-1	1214.27	7956.87	0.152607		fish6-1	1217.73	7618.08	0.159847		fish20-2	1849.62	7817.02	0.236614
		0.231831	0.145695	0.120267	0.286228			fish23-2	2540.14	10956.9	0.231831		fish3-2	1183.88	8125.71	0.145695		fish6-2	1369.87	7954.7	0.172209		fish21	3004.26	10496.1	0.286228
		0.235479	0.122006	0.18306	0.165589			fisg24-1	2516.45	10686.5	0.235479		fish5-1	768.289	6297.12	0.122006		fish7-1	887.538	7379.7	0.120267		fish22-1	1858.87	11225.8	0.165589
		0.232024	0.144667	0.195904	0.188161			fish25-1	2501.49	10781.2	0.232024		fish5-2	863.477	5968.72	0.144667		fish8-1	1471.55	8038.65	0.18306		fish22-2	2004.01	10650.5	0.188161
		0.193681	0.131978	0.242219	0.208038			fish26-1	1620.2	8365.3	0.193681		fish11-1	909.932	6894.58	0.131978		fish9-1	1800.55	9190.95	0.195904		fish23-1	1963.64	9438.84	0.208038
		0.190479	0.137626	0.228848	0.171983			fish27-1	1528.29	8023.4	0.190479		fish11-2	1068.03	7760.41	0.137626		fish9-2	2192.09	9050.04	0.242219		fish23-2	1686.93	9808.72	0.171983
		0.178116	0.223285	0.218366	0.194468			fish28-1	1720.33	9658.45	0.178116		fish20	1888.76	8458.98	0.223285		fish10-1	1904.78	8323.32	0.228848		fisg24-1	1787.38	9191.12	0.194468
		0.173431		0.150453	0.194848			fish28-2	1726.47	9954.8	0.173431							fish10-2	1742.22	7978.44	0.218366		fisg24-2	1938.4	9948.23	0.194848
		0.183292		0.176371	0.249673			fish29-1	2030.02	11075.3	0.183292							fish11-2	1066.4	7087.94	0.150453		fish25-1	2436.87	9760.25	0.249673
		0.189429		0.185891	0.238393			fish30-1	1749.32	9234.68	0.189429							fish12-1	1535.01	8703.29	0.176371		fish25-2	2448.36	10270.3	0.238393
		0.222675		0.238794	0.257946			fish30-2	1730.35	7770.71	0.222675							fish12-2	1718.64	9245.42	0.185891		fish26-1	2947.19	11425.6	0.257946
		0.234318		0.214544	0.287922			fish31-1	2071.72	8841.5	0.234318							fish13-2	1352.6	5664.27	0.238794		fish27-1	2768.02	9613.79	0.287922
		0.231945		0.197433	0.347972			fish31-2	2057.97	8872.65	0.231945							fish14-1	1638.44	7636.86	0.214544		fish27-2	2384.05	6851.28	0.347972
		0.228149		0.176538	0.239868			fish32-1	2433.29	10665.4	0.228149							fish14-2	1833.58	9287.08	0.197433		fish29-1	2183.53	9103.04	0.239868
		0.274929		0.159666	0.153545			fish32-2	2805.67	10205.1	0.274929							fish16-1	1322.21	7489.65	0.176538		fish29-2	1493.97	9729.81	0.153545
		0.198796		0.215626	0.13133			fish33-1	2061.22	10368.5	0.198796							fish16-2	1335.41	8363.76	0.159666		fish30	1169.36	8903.96	0.13133
		0.237895		0.218104	0.318794			fish33-2	2308.1	9702.18	0.237895							fish17-1	1521.51	7056.24	0.215626		fish31-1	2966.3	9304.74	0.318794
		0.13866		0.201598	0.206287			fish34-1	1622.64	11702.3	0.13866							fish18-1	1963.82	9004.02	0.218104		fish32-1	1932.67	9368.86	0.206287
		0.169372		0.169246	0.21606			fish34-2	1944.38	11479.9	0.169372							fish18-2	1900.75	9428.43	0.201598		fish32-2	1952.19	9035.39	0.21606
				0.144462	0.277662													fish20	2778.48	16416.8	0.169246		fish33-1	2323.98	8369.8	0.277662
				0.134141	0.307317													fish21	1503.4	10406.9	0.144462		fish34	3460.49	11260.3	0.307317
				0.12951	0.262718													fish23	1411.49	10522.4	0.134141		fish35	1850.38	7043.22	0.262718
					0.212935													fish24	1499.25	11576.3	0.12951		fish1-1	2208.51	10371.7	0.212935
					0.23439																		fish1-2	2520.15	10751.9	0.23439
					0.171707																		fish2-1	1925.06	11211.3	0.171707
					0.1882																		fish2-2	2173.99	11551.5	0.1882
					0.183219																		fish4-1	1877.42	10246.9	0.183219
					0.202448																		fish4-2	2176.57	10751.3	0.202448
					0.185517																		fish5-1	2141.7	11544.6	0.185517
					0.216227																		fish5-2	2393.12	11067.6	0.216227
					0.233552																		fish6-1	2213.14	9475.99	0.233552
					0.212916																		fish6-2	2113.05	9924.33	0.212916
					0.23269																		fish7-1	2739.73	11774.2	0.23269
					0.219696																		fish7-2	2657.15	12094.7	0.219696
					0.250214																		fish9-1	2732.43	10920.4	0.250214
					0.184739																		fish9-2	2051.72	11106.1	0.184739
					0.242305																		fish11-1	2203.9	9095.59	0.242305
					0.22942																		fish11-2	1884.93	8216.07	0.22942
					0.252734																		fish12-1	2155.53	8528.85	0.252734
					0.278516																		fish12-2	2223.28	7982.59	0.278516
					0.19373																		fish13-1	2086.32	10769.3	0.19373
					0.184968																		fish13-2	2012.73	10881.5	0.184968
					0.174914																		fish15-1	1895.93	10839.2	0.174914
					0.185873																		fish15-2	1948.76	10484.3	0.185873
					0.179831																		fish19	2488.01	13835.2	0.179831
					0.186684																		fish20	2849.26	15262.4	0.186684
					0.209069																		fish21	2410.07	11527.6	0.209069
					0.199575																		fish22	3756.75	18823.7	0.199575

## Sheet: Fig. 3T
	FLIM-FRET KIRIN1 measurements 1/Lifetime
	Wild-type	rcan2 knockout	rcan2 knockout +mCherry	rcan2 knockout +rcan2-mCherry
	0.416667	0.446429	0.401606	0.429185
	0.4	0.4329	0.396825	0.357143
	0.423729	0.507614	0.434783	0.396825
	0.392157	0.460829	0.416667	0.338983
	0.37037	0.460829	0.403226	0.357143
	0.3861	0.473934	0.416667	0.377358
	0.37037	0.454545	0.408163	0.357143
	0.361011	0.425532	0.411523	0.373134
	0.355872	0.425532	0.3861	0.3125
	0.4	0.44843	0.442478	0.37037
	0.355872	0.45045	0.420168	0.384615
	0.3861	0.446429	0.421941	0.333333
	0.409836	0.454545	0.401606	0.401606
	0.409836	0.460829	0.4	0.401606
	0.413223	0.492611	0.406504	0.403226
	0.37594	0.42735	0.373134	0.406504
	0.369004	0.425532	0.383142	0.387597
	0.37037	0.431034	0.357143	0.37037
	0.37037	0.446429	0.515464	0.4
	0.393701	0.431034	0.452489	0.395257
	0.3861	0.442478	0.5	0.37594
	0.398406	0.469484	0.515464	0.395257
	0.404858	0.47619	0.452489	0.401606
	0.398406	0.469484	0.5	0.429185
	0.398406	0.416667	0.537634	0.389105
	0.434783	0.429185	0.460829	0.384615
	0.390625	0.421941	0.483092	0.4
	0.398406	0.454545	0.47619	0.367647
	0.383142	0.460829	0.444444	0.37037
	0.357143	0.436681	0.454545	0.406504
	0.413223	0.429185	0.429185	0.37037
	0.414938	0.436681	0.41841	0.37037
	0.3663	0.434783	0.436681	0.37037
	0.37037	0.452489	0.434783	0.30303
	0.413223	0.452489	0.434783	0.363636
	0.37037	0.423729	0.44843	0.357143
	0.348432	0.434783	0.45045	0.384615
	0.381679	0.429185	0.452489	0.374532
	0.4	0.413223	0.462963	0.414938
	0.401606	0.406504	0.440529	0.37037
	0.403226	0.429185	0.5	0.393701
	0.406504	0.436681	0.414938	0.3663
	0.423729	0.434783	0.4
	0.390625	0.434783	0.431034
	0.396825	0.438596	0.434783
	0.357143	0.460829
	0.3663	0.4
	0.416667	0.42735
	0.353357	0.434783
	0.444444	0.442478
	0.361011	0.471698
		0.446429
		0.46729
		0.469484
		0.434783
		0.460829
		0.434783
		0.452489
		0.460829
		0.438596
		0.434783
		0.454545
		0.404858
		0.423729
		0.438596
		0.45045
		0.436681
		0.46729
		0.42735
		0.444444
		0.446429
		0.456621
		0.436681
		0.446429
		0.434783
		0.460829
		0.434783
		0.425532
		0.416667
		0.431034
		0.4329
		0.434783
		0.45045
		0.446429
		0.436681
		0.44843
		0.4329
