# Supplementary material for: The scale of zebrafish pectoral fin buds is determined by intercellular K+ levels and consequent Ca2+-mediated signaling via retinoic acid regulation of Rcan2 and Kcnk5b
Source: PLoS Biol. 2024 Mar 25;22(3):e3002565. doi: 10.1371/journal.pbio.3002565 (PMC11018282; doi:10.1371/journal.pbio.3002565)
Supplement: S4 Data — (XLSX) [file pbio.3002565.s004.xlsx]

## Sheet: Fig. 4E
	Cas9 EV	kcnk5b KO	kcnk5b KO +GFP	kcnk5b KO kcnk5b*-GFP			Cas9 EV					kcnk5b KO					kcnk5b KO +GFP					kcnk5b KO kcnk5b*-GFP
	0.194928	0.10521	0.14482	0.250833
	0.181934	0.13595	0.14502	0.240559				fin bud	eye	f/e			fin bud	eye	f/e			fin bud	eye	f/e			fin bud	eye	f/e
	0.17769	0.074881	0.12897	0.162142			1	1894.88	9720.92	0.194928		1	794.601	7552.54	0.10521		1	1522.14	10510.6	0.14482		1	2773.45	11056.9	0.250833
	0.19811	0.18412	0.116657	0.156292			2	2006.8	11030.4	0.181934		2	1284.32	9447	0.13595		2	1721.98	11874.1	0.14502		2	2729.42	11346.2	0.240559
	0.204795	0.122408	0.13831	0.186648			3	1845.22	10384.5	0.17769		3	589.663	7874.67	0.074881		3	1108.04	8591.46	0.12897		3	1839.45	11344.7	0.162142
	0.168111	0.080797	0.105338	0.20973			4	1816.13	9167.31	0.19811		4	1924.4	10451.9	0.18412		4	1149.3	9851.96	0.116657		4	1493.18	9553.81	0.156292
	0.221777	0.113286	0.10218	0.246839			5	2549.88	12450.9	0.204795		5	1155.25	9437.75	0.122408		5	1129.72	8167.97	0.13831		5	1989.77	10660.5	0.186648
	0.173291	0.193429	0.122528	0.385613			6	2051.19	12201.5	0.168111		6	648.255	8023.23	0.0807973		6	868.12	8241.28	0.105338		6	2240.49	10682.7	0.20973
	0.148676	0.156179	0.154651	0.198522			7	2266.22	10218.4	0.221777		7	884.65	7808.99	0.113286		7	915.046	8955.24	0.10218		7	2340.04	9480.01	0.246839
	0.225929	0.15937	0.057352	0.178797			8	1635.7	9439.05	0.173291		8	2094.99	10830.8	0.193429		8	1205.04	9834.88	0.122528		8	2262.13	5866.32	0.385613
	0.209432	0.143792	0.106726	0.212282			9	1650.48	11101.1	0.148676		9	1735.32	11111.1	0.156179		9	1551.04	10029.3	0.154651		9	2078.13	10468	0.198522
	0.263802	0.152727	0.121168	0.186433			10	2626.2	11624	0.225929		10	1109.54	6962.06	0.15937		10	512.24	8931.48	0.0573522		10	1981.9	11084.6	0.178797
	0.17858	0.088441	0.11986	0.205486			11	2652.78	12666.5	0.209432		11	1428.74	9936.13	0.143792		11	952.675	8926.39	0.106726		11	2633.94	12407.8	0.212282
	0.162413	0.143948	0.191041	0.153262			12	2953.04	11194.2	0.263802		12	982.405	6432.44	0.152727		12	934.755	7714.51	0.121168		12	1582.39	8487.7	0.186433
	0.208658	0.064647	0.150198	0.240881			13	2299.52	12876.7	0.17858		13	729.092	8243.82	0.088441		13	920.834	7682.55	0.11986		13	2172.4	10572	0.205486
	0.209369	0.082921	0.081166	0.200387			14	1979.16	12186	0.162413		14	1454.14	10101.9	0.143948		14	2200.84	11520.3	0.191041		14	1459.22	9521.12	0.153262
	0.244144	0.107066	0.149213	0.267666			15	2454.14	11761.6	0.208658		15	445.274	6887.76	0.0646472		15	1292.36	8604.36	0.150198		15	2419.87	10045.9	0.240881
	0.228866	0.108552	0.189932	0.196045			16	2128.18	10164.7	0.209369		16	786.957	9490.5	0.0829205		16	750.376	9244.9	0.0811665		16	2241.16	11184.2	0.200387
	0.203937	0.159295	0.18197	0.240353			17	2846.53	11659.2	0.244144		17	893.103	8341.63	0.107066		17	1378.23	9236.68	0.149213		17	2692.95	10060.8	0.267666
	0.225654	0.157275	0.069337				18	2589.22	11313.2	0.228866		18	979.95	9027.45	0.108552		18	1945.53	10243.3	0.189932		18	2373.12	12105	0.196045
	0.174486	0.072365	0.104174				19	2328.95	11419.9	0.203937		19	1478.82	9283.53	0.159295		19	1563.01	8589.42	0.18197		19	2519.46	10482.3	0.240353
	0.202442	0.133575	0.082366				20	2250.53	9973.4	0.225654		20	1416.12	9004.07	0.157275		20	544.127	7847.61	0.0693367
	0.247031	0.059379					21	1838.75	10538.1	0.174486		21	725.075	10019.6	0.0723653		21	921.383	8844.64	0.104174
	0.161218	0.09191					22	1799.79	8890.4	0.202442		22	1166.74	8734.68	0.133575		22	775.773	9418.6	0.0823661
	0.216917	0.121589					23	2402.76	9726.55	0.247031		23	517.059	8707.72	0.0593794
	0.232797	0.147193					24	1716.64	10647.9	0.161218		24	817.652	8896.25	0.0919098
	0.245406	0.169401					25	2205.11	10165.7	0.216917		25	985.468	8104.89	0.121589
	0.240549	0.10602					26	2130.93	9153.61	0.232797		26	1216.56	8265.06	0.147193
	0.166113	0.158009					27	2431.23	9907	0.245406		27	1458.39	8609.11	0.169401
	0.192258	0.16188					28	1936.34	8049.67	0.240549		28	788.36	7435.97	0.10602
		0.138556					29	1572.33	9465.37	0.166113		29	1457.97	9227.13	0.158009
		0.144847					30	1734.26	9020.48	0.192258		30	1281.44	7916.01	0.16188
		0.155099										31	1207.79	8716.99	0.138556
		0.136657										32	1241.15	8568.71	0.144847
		0.127375										33	1374.96	8865.02	0.155099
		0.152743										34	1219.52	8923.94	0.136657
		0.148321										35	1155.75	9073.56	0.127375
												36	1373.86	8994.57	0.152743
												37	1327.04	8947.13	0.148321

## Sheet: Fig. 4I
	WT non-Tg	WT +rcan2-Tg	kcnk5bKO +rcan2-Tg		WT non-Tg	eye	fin	ratio		WT +rcan2-Tg	eye	fin	ratio		kcnk5bKO +rcan2-Tg	eye	fin	ratio
	0.134515	0.120811	0.206867		1	11950.1	1607.47	0.134515		1	9524.15	1150.63	0.120811		1	6315.76	1306.52	0.206867
	0.176275	0.234472	0.081055		2	11882	2094.5	0.176275		2	9182.68	2153.08	0.234472		2	8694.6	704.745	0.0810555
	0.136657	0.228024	0.169654		3	13379.6	1828.43	0.136657		3	9508.1	2168.07	0.228024		3	7209.77	1223.16	0.169654
	0.14497	0.154546	0.161033		4	12881.6	1867.44	0.14497		4	8185.6	1265.05	0.154546		4	6418.85	1033.65	0.161033
	0.161117	0.286398	0.168638		5	11950.2	1925.38	0.161117		5	8044.4	2303.9	0.286398		5	7948.63	1340.44	0.168638
	0.155761	0.193419	0.146429		6	11658	1815.87	0.155761		6	8963.21	1733.65	0.193419		6	7108.64	1040.91	0.146429
	0.137891	0.292377	0.106234		7	12151.1	1675.53	0.137891		7	8922.07	2608.61	0.292377		7	7368.89	782.83	0.106234
	0.160489	0.13739	0.112764		8	11608.8	1863.08	0.160489		8	10104.8	1388.3	0.13739		8	6681.71	753.455	0.112764
	0.135429	0.158578	0.139515		9	11914.6	1613.59	0.135429		9	10427.8	1653.62	0.158578		9	9164.07	1278.52	0.139515
	0.151613	0.192338	0.126263		10	12317.9	1867.55	0.151613		10	10211.8	1964.13	0.192338		10	9935.18	1254.44	0.126263
	0.168024	0.145005	0.092846		11	11259.4	1891.86	0.168024		11	9651.89	1399.57	0.145005		11	7052.88	654.834	0.0928464
	0.159532	0.17256	0.106526		12	11764.3	1876.78	0.159532		12	10412.9	1796.84	0.17256		12	7179.33	764.787	0.106526
	0.149302	0.112144	0.072937		13	11533.6	1721.98	0.149302		13	9203.21	1032.09	0.112144		13	6854.25	499.929	0.0729371
	0.161414	0.173658	0.073587		14	9947.26	1605.63	0.161414		14	9493.88	1648.69	0.173658		14	6532.45	480.705	0.0735872
	0.154398	0.164522	0.070546		15	10340.4	1596.54	0.154398		15	9744.86	1603.25	0.164522		15	6713.59	473.62	0.0705465
	0.152066	0.262767	0.184156		16	11871.4	1805.22	0.152066		16	9678.76	2543.26	0.262767		16	7505.03	1382.1	0.184156
	0.17516	0.222696	0.132019		17	12103.3	2120.01	0.17516		17	10128.4	2255.56	0.222696		17	8410.24	1110.31	0.132019
	0.160949	0.13813	0.159907		18	12025.2	1935.44	0.160949		18	10098.5	1394.91	0.13813		18	6269.8	1002.58	0.159907
	0.144089	0.170866	0.10689		19	11533.4	1661.84	0.144089		19	9370.67	1601.13	0.170866		19	8200.34	876.532	0.10689
	0.145309	0.177273	0.033055		20	11389.4	1654.99	0.145309		20	9949.59	1763.79	0.177273		20	7387.76	244.203	0.0330551
	0.201615	0.178565	0.078647		21	9858.33	1987.59	0.201615		21	11593.5	2070.19	0.178565		21	9945.41	782.177	0.0786471
		0.173602	0.059471							22	10640.6	1847.23	0.173602		22	10237.4	608.832	0.0594712
		0.196908	0.08082							23	11384.7	2241.73	0.196908		23	7941.02	641.79	0.0808196
		0.218929	0.110734							24	9644.45	2111.44	0.218929		24	6339.52	701.999	0.110734
		0.178323	0.086722							25	9169.22	1635.08	0.178323		25	9247.04	801.922	0.086722
		0.178654	0.074887							26	11291.7	2017.31	0.178654		26	11709.8	876.907	0.0748868
		0.171774	0.068159							27	10288	1767.2	0.171774		27	12517.5	853.174	0.0681587
		0.22033	0.062959							28	11272.6	2483.68	0.22033		28	10735.3	675.88	0.0629588
		0.19751	0.130226							29	11553.6	2281.95	0.19751		29	11313.7	1473.34	0.130226
		0.196137	0.161899							30	12329.7	2418.32	0.196137		30	12406.4	2008.58	0.161899
		0.206024	0.062306							31	12669.8	2610.28	0.206024		31	11902.1	741.578	0.0623064
		0.128092	0.131313							32	11246.2	1440.56	0.128092		32	11821.7	1552.34	0.131313
		0.223592	0.203808							33	10291	2300.97	0.223592		33	11610.9	2366.4	0.203808
		0.200922	0.166333							34	10848	2179.59	0.200922		34	12224	2033.26	0.166333
		0.199155	0.164234							35	10795.7	2150.03	0.199155		35	12909.1	2120.11	0.164234
		0.263055	0.066248							36	10706.4	2816.38	0.263055		36	11967.9	792.847	0.0662478
		0.194973	0.128738							37	10863.1	2118.01	0.194973		37	12267.7	1579.32	0.128738
		0.16267	0.121853							38	10760.6	1750.43	0.16267		38	12481.9	1520.96	0.121853
		0.187341	0.156299							39	11349.6	2126.24	0.187341		39	12047.3	1882.97	0.156299
			0.109292												40	10824.5	1183.04	0.109292
			0.146584												41	11203.5	1642.25	0.146584
			0.114851												42	10072.8	1156.87	0.114851
			0.167982												43	10349.4	1738.51	0.167982

## Sheet: Fig. 4L
	kcnk5bS345 +rcan2	kcnk5bS345A +rcan2			kcnk5bS345 +rcan2	fin bud area/um2	eye area/um2	fin/eye		kcnk5bS345A +rcan2	fin bud area/um2	eye area/um2	fin/eye
	0.243935	0.151615			fish1-1	2864.1	11741.2	0.243935		fish1-1	1885.56	12436.5	0.151615
	0.167391	0.196439			fish1-2	2015.81	12042.5	0.167391		fish1-2	2328.5	11853.5	0.196439
	0.190132	0.249205			fish2-1	2156.72	11343.3	0.190132		fish2-1	2778.47	11149.3	0.249205
	0.158003	0.209097			fish2-2	1812.18	11469.3	0.158003		fish2-2	2274.17	10876.2	0.209097
	0.294422	0.158365			fish3-1	1678.41	12330.8	0.136116		fish3-1	1670.42	10547.9	0.158365
	0.19761	0.1785			fish3-2	2269.06	11482.5	0.19761		fish3-2	1805.39	10114.2	0.1785
	0.252122	0.173235			fish4-1	3076.34	12201.8	0.252122		fish4-1	2081.72	12016.8	0.173235
	0.215963	0.199458			fish4-2	2557.85	11843.9	0.215963		fish4-2	2146.65	10762.4	0.199458
	0.281131	0.196338			fish10-1	2924.59	10403	0.281131		fish5-1	1702.38	8670.7	0.196338
	0.20416	0.216688			fish10-2	2409.7	11803	0.20416		fish5-2	1995.88	9210.83	0.216688
	0.209213	0.153957			fish11-1	2219.93	10610.9	0.209213		fish6-1	1612.83	10475.8	0.153957
	0.173265	0.258255			fish11-2	1912.62	11038.7	0.173265		fish6-2	1831.49	7091.8	0.258255
	0.232911	0.1853			fish12-1	2410.61	10349.9	0.232911		fish7-1	1815.09	9795.42	0.1853
	0.174893	0.22864			fish12-2	1947.87	11137.5	0.174893		fish7-2	2404.3	10515.7	0.22864
	0.224647	0.248142			fish13-1	2631.44	11713.7	0.224647		fish8-1	2660.13	10720.2	0.248142
	0.217809	0.21643			fish13-2	2749.96	12625.6	0.217809		fish8-2	2458.14	11357.7	0.21643
	0.189143	0.215269			fish14-1	2042.92	10801	0.189143		fish9-1	2330.47	10825.8	0.215269
	0.183603	0.206073			fish15-1	2363.82	12874.7	0.183603		fish9-2	2249.25	10914.9	0.206073
	0.224426	0.227514			fish15-2	2669.52	11894.9	0.224426		fish10-1	2467.43	10845.2	0.227514
	0.173361	0.236894			fish16-1	2173.62	12538.1	0.173361		fish10-2	2680.43	11314.9	0.236894
	0.195024	0.169803			fish17-1	1934.7	9920.33	0.195024		fish11-1	1999.64	11776.2	0.169803
	0.240347	0.200302			fish18-1	2584.72	10754.1	0.240347		fish11-2	2192.62	10946.6	0.200302
	0.191803	0.17266			fish18-2	2189.93	11417.6	0.191803		fish12-1	2100.75	12167	0.17266
	0.210147	0.205908			fish19-1	2233.46	10628.1	0.210147		fish12-2	2402.16	11666.2	0.205908
	0.232204	0.207304			fish20-1	2252.82	9701.91	0.232204		fish13-1	2461.74	11875.1	0.207304
	0.214296	0.206057			fish20-2	2030.86	9476.88	0.214296		fish13-2	2399.39	11644.3	0.206057
	0.188648	0.170023			fish21-1	2548.35	13508.5	0.188648		fish14-1	2005.36	11794.6	0.170023
	0.16251	0.177845			fish21-2	2186.08	13452	0.16251		fish14-2	1890.66	10631	0.177845
	0.19163	0.192441			fish22-1	1963.78	10247.8	0.19163		fish15-1	2280.64	11851.1	0.192441
	0.204534	0.180772			fish22-2	2239.54	10949.5	0.204534		fish15-2	1811.9	10023.2	0.180772
	0.178012	0.23608			fish23-1	2157.99	12122.7	0.178012		fish16-1	2587.93	10962.1	0.23608
	0.255817	0.241099			fish23-2	2941.82	11499.7	0.255817		fish16-2	2702.96	11211	0.241099
	0.223686	0.163552			fish24-1	2664.43	11911.5	0.223686		fish17-1	2889.63	10416.4	0.277412
	0.259409	0.202439			fish24-2	3040.29	11720.1	0.259409		fish17-2	2328.49	11502.2	0.202439
	0.202927	0.203617			fish26-1	2394.59	11800.3	0.202927		fish18-1	2229.55	10949.7	0.203617
	0.197674	0.193049			fish26-2	2431.72	12301.7	0.197674		fish18-2	1959.63	10151	0.193049
	0.23292	0.224668			fish27-1	2823.2	12120.9	0.23292		fish19-1	2216.2	9864.37	0.224668
	0.243795	0.208177			fish27-2	2891.79	11861.6	0.243795		fish19-2	2250.33	10809.7	0.208177
	0.203895	0.21721			fish29-1	2244.9	11010.1	0.203895		fish20-1	2262.42	10415.8	0.21721
	0.174964	0.231971			fish29-2	2108	12048.2	0.174964		fish20-2	2363.49	10188.7	0.231971
	0.182601	0.193355			fish30-1	2039.83	11170.9	0.182601		fish21-1	1994.43	10314.9	0.193355
	0.191848	0.225805			fish30-2	2124.3	11072.8	0.191848		fish22-1	2131.63	9440.16	0.225805
	0.254245	0.192224			fish31-1	2992.61	11770.6	0.254245		fish22-2	2034.5	10584	0.192224
	0.196551	0.196457			fidsh32-1	2584.42	13148.8	0.196551		fish23-1	2033.84	10352.6	0.196457
	0.165979	0.248804			fidsh32-2	2232.25	13449	0.165979		fish23-2	2643.29	10624	0.248804
	0.214289	0.186089			fish33-1	2551.55	11907	0.214289		fish24-1	2405.33	12925.7	0.186089
	0.257374	0.242787			fish33-2	2936.29	11408.7	0.257374		fish24-2	2056.36	8469.81	0.242787
	0.174684	0.136116			fidsh34-1	2092.14	11976.7	0.174684		fish25-1	2247.39	7633.23	0.294422
	0.252476	0.213459			fidsh34-2	2853.99	11304	0.252476		fish26-1	2205.82	10333.7	0.213459
	0.154306	0.186775			fish35-1	1967.18	12748.5	0.154306		fish26-2	1960.01	10494	0.186775
	0.197618	0.175386			fish35-2	2407.7	12183.6	0.197618		fish27-1	1849.04	10542.7	0.175386
	0.341259	0.239042			fish36-1	2887.18	8460.37	0.341259		fish28-1	2269.93	9495.94	0.239042
	0.270862	0.220886			fish36-2	2076.57	7666.53	0.270862		fish28-2	2025.82	9171.36	0.220886
	0.168019	0.15957			fish37-1	2054.92	12230.3	0.168019		fish1-1	1607.07	10071.3	0.15957
	0.277412	0.168832			fish37-2	2021.17	12357.9	0.163552		fish2-1	1238.51	7335.73	0.168832
	0.246549	0.228748			fish38-1	2861.54	11606.3	0.246549		fish3-1	2248.62	9830.13	0.228748
	0.233206	0.169191			fish38-2	2747.46	11781.3	0.233206		fish4-1	1637.12	9676.18	0.169191
	0.187703	0.182286			fish39-1	2087.86	11123.2	0.187703		fish4-2	1656.26	9086.03	0.182286
	0.21336	0.147937			fish39-2	2387.24	11188.8	0.21336		fish5-1	1517.42	10257.2	0.147937
	0.244808	0.165147			fish40-1	3076.52	12567.1	0.244808		fish5-2	1708.95	10348.1	0.165147
	0.237684	0.193788			fish40-2	2951.77	12418.9	0.237684		fish6-1	2100.05	10836.8	0.193788
	0.223894	0.167824			fish41-1	2438.1	10889.5	0.223894		fish6-2	1867.64	11128.5	0.167824
	0.199988	0.236461			fish41-2	2100.83	10504.8	0.199988		fish7-1	2255.86	9540.09	0.236461
	0.224574	0.140432			fish42-1	2533.32	11280.5	0.224574		fish7-2	1496.46	10656.2	0.140432
	0.256661	0.174798			fish42-2	2937.99	11447	0.256661		fish8-1	1755.41	10042.5	0.174798
	0.18313	0.21991			fish43-1	2075.53	11333.7	0.18313		fish8-2	2133.73	9702.73	0.21991
	0.215796	0.187764			fish43-2	2645.94	12261.3	0.215796		fish9-1	1804.01	9607.83	0.187764
	0.269886	0.194117			fish44-1	2947.42	10921	0.269886		fish11-1	1721.53	8868.51	0.194117
	0.208395	0.139673			fish44-2	2170.65	10416	0.208395		fish11-2	1206.71	8639.6	0.139673
	0.228603	0.250211			fish45-1	2372.49	10378.2	0.228603		fish12-1	2620.99	10475.1	0.250211
	0.226945	0.163878			fish45-2	2506.41	11044.1	0.226945		fish12-2	1748.38	10668.8	0.163878
	0.265904				fish46-1	3061.39	11513.1	0.265904
	0.255517				fish46-2	2969.6	11621.9	0.255517
	0.185541				fish47-1	2135.84	11511.4	0.185541
	0.175586				fish47-2	2011.96	11458.5	0.175586
	0.223513				foish48-1	2750.48	12305.7	0.223513
	0.191163				foish48-2	2350.52	12295.9	0.191163
	0.219875				fish49-1	2962.1	13471.8	0.219875
	0.233958				fish49-2	3051.8	13044.2	0.233958
	0.227273				fish1-1	2057.6	9053.44	0.227273
	0.237498				fish3-1	2072.77	8727.52	0.237498
	0.219758				fish3-2	1969.58	8962.49	0.219758
	0.215008				fish4-2	1862.41	8662.05	0.215008
	0.213729				fish4-1	1750.07	8188.27	0.213729
	0.252573				fish5-1	2001.4	7924.04	0.252573
	0.264388				fish5-2	1977.75	7480.48	0.264388
	0.226827				fish6-1	1841.11	8116.8	0.226827
	0.25811				fish7-1	2381.36	9226.12	0.25811
	0.196897				fish7-2	2052.23	10422.8	0.196897
	0.238963				fish8-1	2162.77	9050.67	0.238963
	0.273372				fish8-2	2125.56	7775.35	0.273372
	0.246807				fish9-1	2037.1	8253.82	0.246807
	0.199312				fish9-1	1689.88	8478.52	0.199312
