# Supplementary material for: The scale of zebrafish pectoral fin buds is determined by intercellular K+ levels and consequent Ca2+-mediated signaling via retinoic acid regulation of Rcan2 and Kcnk5b
Source: PLoS Biol. 2024 Mar 25;22(3):e3002565. doi: 10.1371/journal.pbio.3002565 (PMC11018282; doi:10.1371/journal.pbio.3002565)
Supplement: S5 Data — (XLSX) [file pbio.3002565.s005.xlsx]

## Sheet: Fig. 5A
		Ectoderm
		DiBAC intensity photon count/pixel
		32hpf	42hpf	48hpf	56hpf
		613.333	762.398	516.88	1413.58
		319.358	700.096	481.806	2453.8
		282.899	730.554	338.279	1734.78
		347.048	660.868	964.996	1616.17
		371.969	799.779	765.167	1696.01
		359.97	749.014	885.619	1044.84
		317.05	459.654	830.7	1399.27
		383.507	627.64	1193.44	1699.24
		346.125	487.344	727.785	585.182
		222.905	449.039	649.792	1463.88
		321.204	465.654	799.779	1605.56
		210.444	512.726	863.928	851.006
		409.351	455.039	1161.6	920.231
		521.034	538.571	1513.72	1329.12
		455.039	410.735	974.688	724.093
		755.014	329.511	605.027	1426.04
		659.945	449.962	995.456	1477.26
		695.481	273.208	868.543	510.88
		385.353	640.562	777.628	1100.68
		632.255	731.016	902.694	978.38
		425.503	563.491	929.461	1201.75
		338.741	579.183	1489.26	759.629
		396.89	713.941	1730.62	754.553
		452.27	642.87	1931.38	702.865
		521.495	846.852	1123.75	781.781
		755.476	747.63	1588.48	878.696
		552.415	945.614	1081.3	821.47
		345.202	563.03	897.617	753.63
		476.729	815.932	1262.2	975.149
		451.808	681.174	1240.97	897.617
		470.269	502.112	749.938	800.702
		818.24	709.326	1424.19	1162.06
		502.112	614.256	970.073	867.62
		710.249	853.313	1799.85	1086.83
		605.949	1138.06	1788.77	1189.75
		767.936	925.308	1385.88	1000.07
		594.412	591.182	723.632	960.381
		762.86	978.38	1291.28	1040.68
		786.396	472.115	754.091	812.24
		602.719	709.787	342.894	1007.92
		667.329	1308.35	527.495	1224.82
		273.208	761.937	311.974	943.768
		318.435		539.494	1078.06
		343.817		624.871	963.612
		287.514		563.953	921.615
		272.285		287.976	1152.37
		357.663		617.948	1543.72
				150.911	918.385
					422.734
					548.262
					495.19
					483.652
					618.871
					553.338
					579.183
					653.946
					482.729
					482.729
					497.036
					519.649
					474.884
					553.338
					481.806
					857.928
					556.107
					689.481
					854.236
					809.01
					879.619
					1239.13
					1017.61
					869.928
					800.241
					1100.68
					563.953
					828.393
					991.764
					689.019
					631.793
					1223.44
					695.019
					1090.53
					1370.19
					836.238
					1014.84
					1195.29
					335.972
					582.413
					661.791
					546.878
					710.249
					976.995
					349.817
					266.747
					453.193
					314.281

## Sheet: Fig. 5B
		Mesenchyme
		DiBAC intensity photon count/pixel
		32hpf	42hpf	48hpf	56hpf
		323.973	525.187	1120.98	1135.29
		315.666	480.421	965.458	1023.15
		426.887	649.331	941.46	975.611
		551.492	557.03	968.688	988.995
		461.5	641.024	662.714	1276.05
		370.123	443.502	608.718	1213.28
		375.661	349.356	656.715	837.161
		305.974	289.822	620.256	1192.06
		381.661	752.245	769.321	1118.21
		353.971	722.709	735.169	1358.66
		309.666	782.704	601.796	1003.3
		382.122	693.635	594.412	1108.52
		383.968	827.47	751.784	1060.99
		395.044	707.941	815.932	1036.53
		436.118	839.468	815.009	721.324
		237.673	692.25	813.625	1036.53
		313.82	770.705	671.021	1550.64
		232.596	919.769	873.158	1048.07
		245.056	849.16	915.154	1003.76
		603.181	692.25	745.784	987.61
		616.564	655.792	881.004	889.772
		662.253	727.785	1090.99	1132.06
		602.258	676.559	881.004	963.612
		512.726	710.71	943.306	987.61
		597.643	550.108	767.475	971.919
		557.953	843.16	909.155	994.994
		575.029	576.413	886.542	935.922
		402.428	691.788	898.54	1179.59
		473.961	589.336	713.018	923.923
		483.652	620.717	690.404	744.861
		483.652	680.712	633.178	675.636
		485.498	692.712	841.314	969.15
		500.728	781.319	1476.8	1184.67
		495.19	803.01	1489.26	972.842
		503.958	845.929	1496.18	941.46
		440.271	931.769	1634.17	689.019
		476.729	651.638	1075.3	850.083
		440.271	902.232	1472.65	704.249
		525.187	664.098	1060.53	662.714
		590.72	753.63	672.867	678.405
		475.807	576.413	917.462	1479.11
		606.411	686.25	982.072	865.312
		580.106	649.331	1009.3	919.308
		506.265	699.634	1108.52	1513.26
		504.42	891.618	984.841	864.389
		566.26	1008.84	1234.97	1004.22
		608.718	782.704	1084.53	927.615
		547.801	861.62	981.149	862.543
		587.49	621.64	1135.29	1619.87
		576.413	766.552	1231.28	2271.97
		494.267	605.027	1210.05	1753.7
		500.728	730.554	1052.68	1903.23
		543.186	773.474	744.399	1563.1
		418.58	1226.21	1064.68	1600.94
		315.666	878.696	820.547	959.92
		350.74	950.229	1232.2	897.156
		355.355		354.894	639.178
		441.656		393.198	994.994
		364.123		256.132	531.648
		323.512		346.125	491.959
		374.738		231.673	1535.87
		289.822		319.358	1660.94
				311.974	789.626
				280.13	753.63
				414.889	1049.91
				447.193	1236.82
				536.263	819.624
				438.887	1089.6
					302.744
					423.657
					430.579
					323.512
					479.96
					474.422
					509.957
					386.276
					428.733
					436.579
					403.351
					431.041
					552.877
					483.19
					505.804
					379.815
					341.51
					423.657
					453.193
					419.042
					518.264
					546.416
					652.1
					512.726
					672.405
					706.557
					672.405
					511.342
					640.562
					636.87
					677.02
					568.568
					571.337
					653.946
					557.492
					372.892
					496.113
					553.8
					541.34
					488.728
					457.346
					589.336
					522.418
					561.645
					710.249
					1111.75
					756.399
					500.266
					689.019
					991.764
					980.226
					695.942
					549.646
					638.716
					532.571
					522.88
					436.118
					654.407
					390.429
					393.198
					371.046
					491.036
					462.885
					492.421
					351.202
					438.425
					491.959
					389.967
					597.181
					354.432
					422.272
					247.364
					351.663
					304.128
					267.67

## Sheet: Fig. 5K
		DiBAC intensity photon count/pixel
		mCherry	kcnk5b-Tg
		411.197	654.407
		544.109	752.707
		437.041	691.788
		245.518	837.161
		209.521	552.877
		217.828	458.269
		281.515	485.498
		243.672	552.415
		416.273	564.414
		277.361	572.26
		335.51	586.567
		216.444	635.947
		390.429	434.272
		258.44	443.502
		214.597	460.577
		249.672	470.269
		292.13	522.88
		317.512	516.88
		286.13	637.332
		211.828	573.644
		365.508	615.179
		395.967	583.336
		384.43	509.496
		473.038	574.106
		259.825	495.19
		263.055	575.029
		262.132	408.889
		366.431	601.796
		274.131	704.711
		362.739	721.786
		431.502	641.947
		588.874	901.771
		308.743	641.485
		339.202	703.788
		304.59	611.026
		317.974	617.025
		319.358	784.088
		365.046	531.187
		298.591	563.953
		415.812	683.481
		225.673	638.716
		227.058	558.876
		209.521	462.423
		175.37	490.113
		362.277	489.651
		469.346	352.586
		376.584	304.128
		456.423	490.575
		335.049
		377.507
		346.587
		364.585
		385.353
		398.274
		383.968
		425.041
		120.913
		145.834
		146.296
		186.907
		262.132
		227.981
		215.982
		271.362

## Sheet: Fig. 5L
		DiBAC intensity photon count/pixel
		mCherry Et+DMSO	mCherry Vin+Dib	kcnk5b Et+DMSO	kcnk5b Vin+Dib
		725.478	284.284	963.15	299.975
		653.023	249.672	942.383	305.051
		722.247	299.052	1068.83	306.897
		711.172	293.514	1275.59	348.433
		603.181	268.593	783.627	243.21
		551.031	311.051	856.544	268.132
		588.413	324.435	851.467	320.281
		562.568	337.818	995.917	309.205
		636.87	366.431	591.643	112.606
		657.176	394.582	671.021	154.141
		632.255	465.654	621.179	143.988
		700.096	432.425	673.79	162.91
		694.096	341.51	504.42	122.297
		660.407	322.589	481.806	124.605
		576.875	350.74	548.723	141.68
		540.878	373.815	517.341	151.372
		538.571	287.514	853.775	285.207
		545.955	310.589	863.928	359.97
		576.875	333.664	987.149	305.051
		519.188	371.969	916.539	404.274
		645.177	353.048	877.773	146.757
		727.324	329.973	820.547	145.834
		647.946	370.123	1044.84	155.525
		607.795	317.512	1299.58	174.447
		576.875	289.361	962.689	211.828
		452.27	337.818	1022.68	266.286
		514.572	346.587	928.077	750.861
		550.569	333.203	1121.44	293.053
		634.562	272.747	782.704	209.521
		642.408	275.977	827.47	278.284
		635.486	346.125	789.165	245.98
		557.03	323.512	790.549	257.055
		648.869	355.355	714.402	267.67
		708.403	339.664	761.014	316.589
		692.25	351.663	733.323	273.67
		737.477	354.894	1023.15	305.513
		539.032	310.128	590.72	202.599
		606.411	318.897	622.563	273.208
		593.489	321.666	643.793	292.591
		599.027	370.123	684.404	275.977
		537.186	273.208	465.192	304.59
		613.333	283.822	417.196	344.74
		411.197	317.05	498.42	326.281
		567.645	247.826	774.859	350.74
		571.337	425.964	602.719	272.285
		551.492	486.882	488.267	275.054
		515.495	411.658	573.644	308.743
		540.878	486.421	940.537	262.594
		515.957	360.893	655.792	434.272
		550.569	377.969	662.253	491.036
		515.957	425.503	611.026	441.656
		681.174	484.575	675.636	434.733
		506.265	281.515	931.307
		573.183	281.515	961.304
		623.486	322.127	970.996
		645.639	304.59	1372.5
		540.878	343.356	774.397
		614.256	369.661	862.543
		487.344	392.736	877.773
		657.638	431.964	996.379
		477.191	535.802
		545.955	560.722
		470.73	521.495
		434.733	608.718
		539.032	445.809
		586.105	495.651
		587.49	501.651
		642.87	547.801
			406.12
			413.043
			458.731
			487.805
			445.348
			488.728
			486.882
			519.188
			479.498
			510.419
			588.413
			589.797
			446.732
			506.727
			575.029
			562.568
			293.514
			345.202
			357.663
			406.582

## Sheet: Fig. 5Q
		Fin-to-eye Ratios
		AB Et+DMSO	AB Vin+Dib	kcnk5b Et+DMSO	kcnk5b Vin+Dib		AB Et+DMSO		1	2	3	4	5	6	7	8	9	10	11	12	13	14	15	16	17	18	19	20	21	22	23	24	25
		0.156096	0.152336	0.180834	0.117702			fin	1746.57	1197.4	1345.84	1566.06	1229.75	1341.67	1820.62	1454.99	923.882	1681.67	1523.31	1767.27	1388.38	1366.88	1378.74	926.092	1373.49	1692.33	1587.46	1112.61	1193.04	1658.87	898.382	1741.13	1139.04	1144.59	1146.36	1803.01	1184.44	1659.59	1536.87	1503.3	1674.93	1109.19	1980.88	1906.14	1699.42	1573.66	1898.7	1572.16	1504.39
		0.118859	0.122493	0.215456	0.129552			eye	11189.1	10074.2	10709	11048.5	10584.2	9938.92	12164.8	11332	9610.49	9449.69	10279.4	11569.7	9994.59	11029	10739.1	8336.93	9519.25	10858.9	12033.2	11923.5	9808.91	10112.2	8809.69	11205.4	10576.3	10186.1	11045.3	12316.8	11507.1	13107.2	11775.1	11074.6	10755.9	10448.6	12084.5	12205.6	11236.7	11999.6	11377.6	10324.5	9994.2
		0.125673	0.155784	0.229774	0.126717			Fin-to-eye ratio	0.156096	0.118859	0.125673	0.141744	0.116188	0.134992	0.149663	0.128397	0.0961327	0.17796	0.14819	0.152749	0.138913	0.123934	0.128386	0.111083	0.144285	0.155848	0.131924	0.093312	0.121628	0.164047	0.101977	0.155383	0.107697	0.112368	0.103787	0.146386	0.102932	0.126617	0.130519	0.135744	0.155722	0.106157	0.163919	0.156169	0.151238	0.131143	0.166881	0.152275	0.150526
		0.141744	0.141433	0.158974	0.14165
		0.116188	0.121642	0.152587	0.167673		AB Vin+Dib	fin	1403.21	1563.66	1391.78	1370.75	1456.94	1650.47	1649.21	1280.69	988.608	1312.38	1289.53	1622.36	1537.8	2046.44	1442.84	1268.27	1458.11	1551.14	1532.35	1573.86	1634.19	1092.97	1430.15
		0.134992	0.159861	0.151001	0.143501			eye	9211.32	12765.3	8934.06	9691.86	11977.3	10324.4	10989.4	10846.8	9253.9	10693.2	8513.37	10459.2	11201.9	12114.4	10706.9	10929.5	10041.4	10333.9	9560.55	10923.1	11069	9223.31	9763.54
		0.149663	0.150073	0.181863	0.150635			Fin-to-eye ratio	0.152336	0.122493	0.155784	0.141433	0.121642	0.159861	0.150073	0.118071	0.106831	0.12273	0.151471	0.155113	0.137281	0.168926	0.134758	0.116041	0.145209	0.150103	0.160278	0.144085	0.147636	0.118501	0.146479
		0.128397	0.118071	0.152124	0.121525
		0.096133	0.106831	0.145579	0.156081		kcnk5b Et+DMSO	fin	1528.87	1814.68	2024.26	1391.58	1307.83	1303.47	1644.5	1250.88	1204.74	1375.22	1707.42	925.192	1868.18	1302.83	1043.3	1430.27	1389.05	1150.15	1519.3	1375.83	1065.57	1257.38	1114.1	1574.98	1126.55	2107.37	2100.17	1257.58	1145.73	1275.94	1150.22	1331.48	1333.63	1133.78	1118.11	936.547	1707.84	1884.58	1739.32	1637.69	1077.5
		0.17796	0.12273	0.160135	0.120017			eye	8454.54	8422.49	8809.8	8753.53	8571.06	8632.2	9042.53	8222.81	8275.56	8587.88	9104.52	8384.7	8916.79	9154.67	8614.9	8675.38	8125.32	8758	7717.38	8705.6	8236.25	10118.1	7577.33	10982.2	8346.49	9046.78	8165.36	8137.4	8950.04	7588.29	7616.44	6748.28	9058.73	6729.36	7761.73	6829.23	9475.97	8422.75	9094.74	8545.87	8123.65
		0.14819	0.151471	0.187536	0.111443			Fin-to-eye ratio	0.180834	0.215456	0.229774	0.158974	0.152587	0.151001	0.181863	0.152124	0.145579	0.160135	0.187536	0.110343	0.209513	0.142313	0.121104	0.164866	0.170953	0.131326	0.196867	0.15804	0.129375	0.12427	0.14703	0.143413	0.134973	0.232942	0.257205	0.154544	0.128014	0.168147	0.151018	0.197306	0.14722	0.168482	0.144054	0.137138	0.180229	0.223749	0.191245	0.191636	0.132637
		0.152749	0.155113	0.110343	0.139237
		0.138913	0.137281	0.209513	0.153093		kcnk5b Vin+Dib	fin	1005.7	1282.03	1484.21	1088.09	1450.24	1132.62	1171.96	952.771	1410.83	1278.29	840.722	1194.75	1587.89	727.112	920.128	761.422	1076.17	958.473	1521.39	1298.41	1271.37	1212.42	979.417	1223.99	832.582	1142.09	876.227	1218.57	1137.12	1038.9	1223.99	1223.99	1592.2	1270.55	1195.93	1580.77	746.656	1694.01	1100.31	768.244	1853.8
		0.123934	0.168926	0.142313	0.104268			eye	8544.45	9895.91	11712.8	7681.52	8649.23	7892.73	7780.13	7840.1	9039.13	10650.9	7543.97	8580.72	10372	6973.48	8719.51	7414.83	8965.72	9008.41	8695.48	9336.94	8330.14	8336.68	7696.84	7393.96	7984.87	12087.5	7946.59	9571.36	8867.46	8969.45	7393.96	7393.96	7795.58	8530.76	8747.21	7996.47	8186.83	9829.21	8310.04	9613.36	10371.2
		0.128386	0.134758	0.121104	0.105525			Fin-to-eye ratio	0.117702	0.129552	0.126717	0.14165	0.167673	0.143501	0.150635	0.121525	0.156081	0.120017	0.111443	0.139237	0.153093	0.104268	0.105525	0.102689	0.120032	0.106398	0.174963	0.139062	0.152622	0.145432	0.127249	0.165539	0.10427	0.0944846	0.110265	0.127314	0.128235	0.115826	0.165539	0.165539	0.204243	0.148938	0.136722	0.197684	0.0912021	0.172344	0.132407	0.0799142	0.178744
		0.111083	0.116041	0.164866	0.102689
		0.144285	0.145209	0.170953	0.120032
		0.155848	0.150103	0.131326	0.106398
		0.131924	0.160278	0.196867	0.174963
		0.093312	0.144085	0.15804	0.139062
		0.121628	0.147636	0.129375	0.152622
		0.164047	0.118501	0.12427	0.145432
		0.101977	0.146479	0.14703	0.127249
		0.155383		0.143413	0.165539
		0.107697		0.134973	0.10427
		0.112368		0.232942	0.094485
		0.103787		0.257205	0.110265
		0.146386		0.154544	0.127314
		0.102932		0.128014	0.128235
		0.126617		0.137138	0.115826
		0.130519		0.180229	0.165539
		0.135744		0.223749	0.165539
		0.155722		0.191245	0.204243
		0.106157		0.191636	0.148938
		0.163919		0.132637	0.136722
		0.156169		0.221579	0.197684
		0.151238		0.169558	0.091202
		0.131143		0.200826	0.172344
		0.166881		0.26884	0.132407
		0.152275		0.171436	0.079914
		0.150526		0.206715	0.178744
		0.125156		0.093824	0.095852
		0.142358		0.176988	0.135307
		0.141597		0.246545	0.168226
				0.232254	0.170358
				0.224425	0.115788
				0.216792	0.142347
				0.256342	0.139295
				0.230941	0.155032
				0.191886	0.103453
				0.111388	0.156817
				0.115618	0.17209
				0.249577	0.200146
				0.264867	0.149269
				0.209603	0.140646
				0.220364	0.108731
				0.12808	0.173571
				0.141916	0.14166
				0.168147	0.109043
				0.151018	0.123
				0.197306	0.168949
				0.14722	0.189363
				0.168482	0.126992
				0.144054	0.143852
					0.167234
					0.158609
[truncated: 25 more columns]
