# Supplementary material for: The scale of zebrafish pectoral fin buds is determined by intercellular K+ levels and consequent Ca2+-mediated signaling via retinoic acid regulation of Rcan2 and Kcnk5b
Source: PLoS Biol. 2024 Mar 25;22(3):e3002565. doi: 10.1371/journal.pbio.3002565 (PMC11018282; doi:10.1371/journal.pbio.3002565)
Supplement: S7 Data — (XLSX) [file pbio.3002565.s007.xlsx]

## Sheet: Fig. 7A
	SHH Expression in HEK293 qRT-PCR
	GFP +DMSO	kcnk5b-GFP +DMSO	Kcnk5b-GFP +0.2μM STO-609	Kcnk5b-GFP +0.5μM STO-609	Kcnk5b-GFP +1μM STO-609	Kcnk5b-GFP +1.5μM STO-609
	1	2.40967	0.953403	1.25504	0.932656	1.01038
	1	3.48437	1.10653	1.8746	1.22936	0.791461
	1	2.68485	1.68337	1.45029	1.46722	1.22432
	1	1.68847	0.87596	2.61835	0.639164	0.408815
	1	1.37026	0.82527	0.781685	1.48479	0.659564
	1	2.14798	0.583554	0.877614	0.444193	0.8891
	1	3.65589	1.47179	0.917636	0.61124	0.993211
	1	4.67359	2.10386	0.866247	1.2233	1.34029
	1	4.08353	1.29935	1.44665	0.534638	1.24947
	sto-609 for hek cells	dmso-GFP	CT	CT mean	delta CT mean		dmso-KC-GFP	CT	CT mean	delta CT mean	delta CT	minus delta CT	fold change		KC-GFP0.2uM	CT	CT mean	delta CT mean	delta CT	minus delta CT	fold change		KC-GFP-0.5uM	CT	CT mean	delta CT mean	delta CT	minus delta CT	fold change		KC-GFP-1uM	CT	CT mean	delta CT mean	delta CT	minus delta CT	fold change		KC-GFP-1.5uM	CT	CT mean	delta CT mean	delta CT	minus delta CT	fold change
	Experimental group 1	gapdh	13.1467	13.1603				12.8158	12.8358							13.26	13.0863							13.234	13.1263							13.2773	13.1616							13.0537	12.9793
			13.2596					12.8272								13.006								13.171								13.1392								13.0075
			13.0746					12.8643								12.993								12.974								13.0682								12.8768
		shh	30.6233	31.4108	18.2505			29.8174	29.5881	16.9816	-1.26884	1.26884	2.40967			31.4056	31.0605	18.3192	0.0687637	-0.0687637	0.953455			31.0492	30.7867	17.9228	-0.327645	0.327645	1.25496			31.513	31.162	18.3514	0.100982	-0.100982	0.932398			31.2149	31.24	18.2356	-0.0148961	0.0148961	1.01038
			31.8807					29.2854		16.4496	-1.8009	1.8009	3.48437			31.1907		18.1043	-0.14612	0.14612	1.10659			30.4703		17.344	-0.906495	0.906495	1.87449			31.114		17.9524	-0.298018	0.298018	1.22945			31.5672		18.5879	0.33741	-0.33741	0.791461
			31.7282					29.6614		16.8256	-1.42484	1.42484	2.68485			30.5854		17.499	-0.751427	0.751427	1.68346			30.8405		17.7142	-0.536254	0.536254	1.4502			30.859		17.6974	-0.553018	0.553018	1.46715			30.9378		17.9585	-0.291984	0.291984	1.22432
	Experimetnal Group 2	gapdh	13.2926	13.3214				13.418	13.367							13.1742	13.1443							13.294	13.278							13.3083	13.3016							13.3088	13.336
			13.3361					13.341								13.1201								13.229								13.2905								13.2659
			13.3355					13.342								13.1385								13.311								13.3061								13.4334
		shh	30.4341	30.5707	17.1127			29.7239	29.7086	16.3569	-0.755717	0.755717	1.68847			30.448	30.672	17.3037	0.191062	-0.191062	0.87596			29.002	30.109	15.724	-1.38866	1.38866	2.61835			31.06	30.8297	17.7584	0.645743	-0.645743	0.639164			31.7391	31.1355	18.4031	1.29048	-1.29048	0.408815
			30.6571					30.0252		16.6582	-0.454449	0.454449	1.37026			30.534		17.3897	0.277062	-0.277062	0.82527			30.746		17.468	0.355341	-0.355341	0.781685			29.844		16.5424	-0.570257	0.570257	1.48479			31.0491		17.7131	0.600415	-0.600415	0.659564
			30.6211					29.3767		16.0097	-1.10298	1.10298	2.14798			31.034		17.8897	0.777062	-0.777062	0.583554			30.579		17.301	0.188341	-0.188341	0.877614			31.585		18.2834	1.17074	-1.17074	0.444193			30.6182		17.2822	0.169583	-0.169583	0.8891
	experimental Group 3	gapdh	12.3896	12.53				12.267	12.2703							12.1719	12.1281							12.0523	12.0912							12.438	12.433							12.3743	12.3836
			12.7061					12.253								12.2274								12.1282								12.438								12.3442
			12.4942					12.291								11.985								12.0932								12.423								12.4322
		shh	31.2879	30.5338	18.0038			28.4039	28.2326	16.1336	-1.87022	1.87022	3.65589			29.5744	29.4625	17.4463	-0.55757	0.55757	1.47179			30.2191	30.0279	18.1278	0.124005	-0.124005	0.917636			31.1468	30.8776	18.7138	0.709968	-0.709968	0.611334			30.3972	30.1427	18.0137	0.00982857	-0.00982857	0.993211
			30.8619					28.0496		15.7793	-2.22453	2.22453	4.67359			29.0589		16.9308	-1.07304	1.07304	2.10386			30.3022		18.211	0.20715	-0.20715	0.866247			30.1458		17.7128	-0.290997	0.290997	1.22349			29.9649		17.5813	-0.422541	0.422541	1.34029
			29.4515					28.2444		15.974	-2.02982	2.02982	4.08353			29.7542		17.6261	-0.377786	0.377786	1.29935			29.5623		17.4711	-0.532714	0.532714	1.44665			31.34		18.907	0.903146	-0.903146	0.534719			30.0661		17.6825	-0.321314	0.321314	1.24947

## Sheet: Fig. 7C
	shh Expression Area (Pixel2)
	non-tg +DMSO	non-tg +24μM STO	kcnk5b +DMSO	kcnk5b +24μM STO		non-tg +DMSO	shh area	fin bud area	ratio		non-tg +24μM STO	shh area	fin bud area	ratio		kcnk5b +DMSO	shh area	fin bud area	ratio		kcnk5b +24μM STO	shh area	fin bud area	ratio
	0.0467817	0.062465	0.190983	0.117424		1	911.929	19493.3	0.0467817		1	1226.53	19635.3	0.0624654		1	1901.3	9955.36	0.190983		1	1878.19	15995	0.117424
	0.0948759	0.097819	0.115891	0.086788		2	1247.15	13145.1	0.0948759		2	1987	20313.1	0.0978187		2	1352.45	11670	0.115891		2	1909.87	22006.2	0.0867878
	0.0503392	0.06742	0.133035	0.095576		3	1001.92	19903.3	0.0503392		3	1486.92	22054.6	0.0674203		3	1636.17	12298.8	0.133035		3	1298.87	13590	0.0955756
	0.0479614	0.101125	0.102006	0.13757		4	877.72	18300.6	0.0479614		4	1352.12	13370.7	0.101125		4	1224.31	12002.3	0.102006		4	2397.05	17424.2	0.13757
	0.0374394	0.072675	0.091111	0.081038		5	586.759	15672.2	0.0374394		5	1075.6	14800	0.0726754		5	1653.54	18148.5	0.0911113		5	1131.82	13966.6	0.0810376
	0.0492861	0.060444	0.119361	0.109349		6	981.586	19916.1	0.0492861		6	1736.24	28724.9	0.0604439		6	1340.71	11232.4	0.119361		6	2116.83	19358.5	0.109349
	0.0446802	0.093844	0.15136	0.09194		7	896.649	20068.1	0.0446802		7	2309.31	24608.1	0.0938437		7	2398.5	15846.3	0.15136		7	1408.43	15319	0.0919401
	0.0972456	0.111961	0.152827	0.107064		8	1265.15	13009.9	0.0972456		8	1919.97	17148.6	0.111961		8	2142.16	14016.9	0.152827		8	1977.28	18468.2	0.107064
	0.0688026	0.085278	0.106037	0.143406		9	1381.43	20078.2	0.0688026		9	1948.9	22853.4	0.085278		9	1521.6	14349.7	0.106037		9	1878.65	13100.2	0.143406
	0.0433261	0.098936	0.105325	0.118407		10	839.384	19373.6	0.0433261		10	2277.99	23024.8	0.0989364		10	1480.9	14060.2	0.105325		10	1999.88	16889.9	0.118407
	0.0731969	0.068003	0.096786	0.083563		11	1521.3	20783.7	0.0731969		11	1444.15	21236.4	0.0680032		11	1441.97	14898.5	0.0967858		11	1185.32	14184.7	0.0835632
	0.0595153	0.128097	0.129669	0.12873		12	1104.79	18563.1	0.0595153		12	2011.73	15704.7	0.128097		12	1517.11	11699.9	0.129669		12	1304.7	10135.2	0.12873
	0.0541071	0.097387	0.099653	0.132494		13	1219.43	22537.4	0.0541071		13	2600.76	26705.4	0.0973871		13	1635.11	16408	0.0996533		13	2244.95	16943.8	0.132494
	0.0548795	0.062965	0.206969	0.073465		14	1739.5	31696.7	0.0548795		14	1697.02	26951.8	0.0629649		14	2452.24	11848.4	0.206969		14	1137.55	15484.2	0.0734652
	0.0727741	0.083667	0.072414	0.109487		15	1387.17	19061.3	0.0727741		15	2322.48	27758.8	0.0836666		15	2146.91	29647.8	0.072414		15	1764.07	16112.1	0.109487
	0.0869316	0.107377	0.150711	0.141915		16	1146.9	13193.2	0.0869316		16	2500.23	23284.6	0.107377		16	2802.61	18596	0.150711		16	2009.37	14158.9	0.141915
	0.0441399	0.07304	0.201041	0.108024		17	1472.12	33351.3	0.04414		17	1814.94	24848.7	0.0730396		17	2958.04	14713.6	0.201041		17	951.306	8806.44	0.108024
	0.0470475	0.065238	0.135711	0.101443		18	933.995	19852.2	0.0470475		18	1332.12	20419.4	0.065238		18	2877.9	21206.1	0.135711		18	2357.53	23239.9	0.101443
	0.0706768	0.07807	0.14875	0.087809		19	1693.78	23965.1	0.0706768		19	1531.04	19611	0.0780703		19	2655.43	17851.6	0.14875		19	2075.59	23637.5	0.0878091
	0.0671031	0.104796	0.204397	0.069302		20	1981.84	29534.3	0.0671031		20	2274.48	21703.9	0.104796		20	1903.44	9312.5	0.204397		20	1347.74	19447.5	0.0693016
	0.0671636	0.040632	0.354098	0.093564		21	1795.86	26738.6	0.0671636		21	878.468	21620.2	0.0406318		21	4033.8	11391.8	0.354098		21	1419.89	15175.6	0.0935642
	0.0896095	0.045041	0.108125	0.095066		22	1653.39	18451	0.0896095		22	1184.12	26289.8	0.0450412		22	1635.39	15125	0.108125		22	1190.01	12517.7	0.0950665
	0.0559524	0.045529		0.137646		23	1546.55	27640.5	0.0559524		23	811.378	17821.2	0.0455288							23	2132.65	15493.7	0.137646
	0.0315328			0.064135		24	616.399	19547.9	0.0315328												24	1010.47	15755.3	0.0641348
				0.149146																	25	2437.3	16341.7	0.149146
				0.13355																	26	2301.79	17235.5	0.13355
				0.122027																	27	1512.39	12393.9	0.122027

## Sheet: Fig. 7D
	Fold Change shh Expression Fin Bud qRT-PCR
	non-Tg +DMSO	non-Tg +24μM STO	kcnk5b-Tg + DMSO	kcnk5b-Tg + 24μM STO			sto-609 for fin bud	non-Tg + DMSO	CT	CT mean	delta CT mean		kcnk5b-Tg + DMSO	CT	CT mean	delta CT mean	delta CT	minus delta CT	fold change		kcnk5b-Tg + 24um STO	CT	CT mean	delta CT mean	delta CT	minus delta CT	fold change
	1	0.42575	1.16536	0.96488			1	ef1a	15.1514	15.1032				15.4678	15.4038							15.207	15.1493
	1	0.465552	1.12765	1.08561					15.0606					15.3324								15.212
	1	0.498111	1.26493	1.25937					15.0975					15.411								15.029
	1	0.329399	1.2892	1.15876				shh	24.2368	24.2642	9.16104			24.344	24.3204	8.94026	-0.220776	0.220776	1.16536			24.3619	24.1772	9.21262	0.0515779	-0.0515779	0.96488
	1	0.292031	1.26906	1.24663					24.2761					24.3915		8.98772	-0.173319	0.173319	1.12765			24.1919		9.04253	-0.118506	0.118506	1.08561
	1	0.296464	1.31238	1.1479					24.2797					24.2257		8.82198	-0.33906	0.33906	1.26493			23.9777		8.82834	-0.332699	0.332699	1.25937
	1	0.297397	1.36246	1.28375			2	ef1a	14.8955	14.7996				14.7395	14.7088							14.8425	14.7756
	1	0.271405	1.42113	1.08482					14.7778					14.6896								14.7818
	1	0.286626	1.55436	1.31954					14.7254					14.6971								14.7026
								shh	23.1891	23.1441	8.3445			22.6868	22.6858	7.97802	-0.366475	0.366475	1.2892			22.9075	22.8769	8.13192	-0.212579	0.212579	1.15876
									23.1194					22.7095		8.00073	-0.343762	0.343762	1.26906			22.8021		8.02646	-0.318033	0.318033	1.24663
									23.1237					22.6611		7.95232	-0.39218	0.39218	1.31238			22.9211		8.14549	-0.199003	0.199003	1.1479
							3	ef1a	14.8336	14.7339				15.252	15.4694							15.681	15.513
									14.686					15.4673								15.577
									14.6821					15.6889								15.281
								shh	23.5931	23.6446	8.9107			23.9339	23.8502	8.46448	-0.446211	0.446211	1.36246			24.0633	24.1311	8.55033	-0.360368	0.360368	1.28375
									23.6961					23.8731		8.40366	-0.50704	0.50704	1.42113			24.3062		8.79324	-0.117458	0.117458	1.08482
														23.7438		8.27438	-0.63632	0.63632	1.55436			24.0237		8.51066	-0.400037	0.400037	1.31954
								non-Tg + DMSO	CT	CT mean	delta CT mean		Non-Tg + 24um STO	CT	CT mean	delta CT mean	delta CT	minus delta CT	fold change
							1	ef1a	16.5668	16.4323				19.4656	19.2992
									16.3305					19.2045
									16.3997					19.2273
								shh	24.062	24.1063	7.67399			28.2051	28.0866	8.90591	1.23192	-1.23192	0.42575
									24.228					28.0761		8.77697	1.10299	-1.10299	0.465552
									24.029					27.9786		8.67945	1.00546	-1.00546	0.498111
							2	ef1a	16.0688	16.0379				14.7037	14.6477
									16.0112					14.6503
									16.0336					14.589
								shh	23.7749	23.8357	7.79783			24.0476	24.1562	9.39992	1.60209	-1.60209	0.329399
									23.8173					24.2213		9.57363	1.77581	-1.77581	0.292031
									23.915					24.1996		9.5519	1.75407	-1.75407	0.296464
							3	ef1a	16.121	16.119				14.6538	14.6337
									16.085					14.6687
									16.151					14.5786
								shh	23.913	23.936	7.817			24.2003	24.262	9.56654	1.74954	-1.74954	0.297397
									23.974					24.3322		9.69848	1.88148	-1.88148	0.271405
									23.921					24.2535		9.61976	1.80276	-1.80276	0.286626

## Sheet: Fig. 7E
	Fin bud-to-eye area ratio
	Non-Tg +DMSO	Non-Tg +24µM STO	kcnk5b-Tg +DMSO	kcnk5b-Tg +24µM STO		Non-Tg +DMSO	Fin Bud Area	Eye Area	Fin Bud Area-to-Eye Area Ratio		Non-Tg +24µM STO	Fin Bud Area	Eye Area	Fin Bud Area-to-Eye Area Ratio		kcnk5b-Tg +DMSO	Fin Bud Area	Eye Area	Fin Bud Area-to-Eye Area Ratio		kcnk5b-Tg +24µM STO	Fin Bud Area	Eye Area	Fin Bud Area-to-Eye Area Ratio
	0.250137	0.220279	0.531805	0.34202		1	60596.9	242255	0.250137		1	3271.22	14850.4	0.220279		1	78595.3	147790	0.531805		1	59094	172780	0.34202
	0.233391	0.227957	0.681802	0.32713		2	51652.1	221311	0.233391		2	2698.36	11837.1	0.227957		2	89512.9	131289	0.681802		2	67310.9	205762	0.32713
	0.279688	0.211183	0.458557	0.307508		3	62344.1	222906	0.279688		3	3164.61	14985.2	0.211183		3	74990.7	163536	0.458557		3	50218	163306	0.307508
	0.271561	0.184794	0.523785	0.258063		4	59358.2	218581	0.271561		4	2319.87	12553.8	0.184794		4	85297.2	162848	0.523785		4	37429.1	145039	0.258063
	0.216814	0.257444	0.477088	0.377942		5	43431.9	200318	0.216814		5	4163.67	16173.1	0.257444		5	74173.1	155471	0.477088		5	55621.2	147168	0.377942
	0.362127	0.148388	0.453951	0.249066		6	95117.3	262663	0.362127		6	1595.29	10750.9	0.148388		6	51203.4	112795	0.453951		6	44535.6	178811	0.249066
	0.247125	0.214236	0.492916	0.360543		7	59425.5	240467	0.247125		7	2846.34	13286	0.214236		7	61315.7	124394	0.492916		7	57379.1	159146	0.360543
	0.28475	0.283716	0.462778	0.312283		8	65082.1	228559	0.28475		8	3604.5	12704.6	0.283716		8	75862.1	163928	0.462778		8	48429	155081	0.312283
	0.22996	0.253756	0.397049	0.334324		9	57826.9	251465	0.22996		9	3599.38	14184.4	0.253756		9	61192.5	154118	0.397049		9	58838	175991	0.334324
	0.334912	0.223131	0.492766	0.280186		10	69391.4	207193	0.334912		10	1934.81	8671.17	0.223131		10	71582.3	145266	0.492766		10	42686.2	152350	0.280186
	0.213949	0.255448	0.328424	0.348414		11	45232	211415	0.213949		11	3747.56	14670.5	0.255448		11	51650.8	157269	0.328424		11	61261.2	175829	0.348414
	0.241692	0.21755	0.438667	0.332399		12	51663.7	213759	0.241692		12	2236.86	10282	0.21755		12	63282.9	144262	0.438667		12	65201.5	196154	0.332399
	0.176676	0.209953	0.33746	0.340446		13	2371.19	13421.1	0.176676		13	2409.35	11475.6	0.209953		13	53745.2	159264	0.33746		13	62603	183885	0.340446
	0.340964	0.274829	0.354873	0.40627		14	4272.45	12530.5	0.340964		14	2656.21	9664.94	0.274829		14	57125.9	160975	0.354873		14	70253.6	172924	0.40627
	0.325809	0.193222	0.347954	0.397614		15	4612.81	14158	0.325809		15	2986.69	15457.3	0.193222		15	51563.1	148189	0.347954		15	63213.7	158983	0.397614
	0.361156	0.207122	0.580325	0.311323		16	4989.02	13814	0.361156		16	3186.46	15384.4	0.207122		16	88231	152037	0.580325		16	55638.6	178716	0.311323
	0.277276		0.410023	0.394019		17	3925.47	14157.2	0.277276							17	66911.8	163190	0.410023		17	65551.1	166365	0.394019
	0.333808		0.445206	0.3609		18	4380.82	13123.8	0.333808							18	60959.9	136925	0.445206		18	46643.1	129241	0.3609
	0.181143		0.412987	0.350101		19	2884.01	15921.2	0.181143							19	62309.7	150875	0.412987		19	55194.8	157654	0.350101
	0.214654		0.479247	0.358936		20	2998.92	13970.9	0.214654							20	72529.7	151341	0.479247		20	58656.7	163418	0.358936
	0.3598		0.49606	0.429655		21	4388.64	12197.4	0.3598							21	73258.4	147680	0.49606		21	61435.7	142988	0.429655
	0.280629			0.335775		22	3791.43	13510.5	0.280629												22	44625.6	132903	0.335775

## Sheet: Fig. 7F
	Fold Change SHH Expression HEK293 qRT-PCR
	mCherry	camkk1b-mcherry		shh	mcherry	CT	CT mean	delta CT mean		CaMKK2-mcherry	CT	CT mean	delta CT mean	delta CT	minus delta CT	fold change
	1	0.998348		Experimental Group 1	gapdh	13.2638	13.1529				12.6353	12.5839
	1	2.11705				13.0923					12.6006
	1	0.987539				13.1026					12.516
	1	1.07842			shh	31.2486	31.0935	17.9848			30.5711	30.1707	17.9872	0.00238578	-0.00238578	0.998348
	1	2.16381				30.8472		17.7549			29.2568		16.6728	-1.08206	1.08206	2.11705
	1	1.67209				31.1847		18.0821			30.6841		18.1002	0.0180909	-0.0180909	0.987539
	1	6.96606		Experimental Group 2	gapdh	12.9159	12.8766				12.9874	12.9458
	1	1.86522				12.8727					12.951
	1	0.854613				12.8411					12.899
	1	1.50671			shh	31.8223	31.6045	18.9064			31.7433	31.019	18.7975	-0.108925	0.108925	1.07842
	1	1.98532				31.7679		18.8952			30.7274		17.7816	-1.11357	1.11357	2.16381
	1	1.29126				31.2234		18.3822			30.5864		17.6406	-0.741655	0.741655	1.67209
	1	3.14097		Experimental group 3	gapdh	12.79	12.7703				12.7652	12.6203
	1	2.11538				12.809					12.5526
	1	0.412709				12.712					12.5432
					shh	31.564	31.1257	18.774			28.594	29.818	15.9737	-2.80034	2.80034	6.96606
						30.948		18.139			29.86		17.2397	-0.899343	0.899343	1.86522
						30.865		18.153			31		18.3797	0.226657	-0.226657	0.854613
				Experimental Group 4	gapdh	13.278	13.195				12.618	12.6561
						13.135					12.6689
						13.172					12.6814
					shh	31.302	31.539	18.024			30.0887	30.3503	17.4326	-0.5914	0.5914	1.50671
						31.467		18.332			29.9987		17.3426	-0.989369	0.989369	1.98532
						31.848		18.676			30.9633		18.3072	-0.368785	0.368785	1.29126
				Experimental Group 5	gapdh	12.791	12.7763				12.7938	12.8206
						12.82					12.7832
						12.718					12.885
					shh	29.74	30.1553	16.949			28.1184	29.7145	15.2978	-1.65121	1.65121	3.14097
						31.318		18.498			30.2377		17.4171	-1.08092	1.08092	2.11538
						29.408		16.69			30.7874		17.9668	1.2768	-1.2768	0.412709

## Sheet: Fig. 7G
	mCherry	camkk1b-mCherry
	1	1.84543		shh	mcherry	CT	CT mean	delta CT mean		camkk1b-mcherry	CT	CT mean	delta CT mean	delta CT	minus delta CT	fold change		camkk1b-mcherry	CT	CT mean	delta CT mean	delta CT	minus delta CT	fold change		camkk1b-mcherry	CT	CT mean	delta CT mean	delta CT	minus delta CT	fold change
	1	1.59788		expreiment group 1	gapdh	11.615	11.6577				11.537	11.6057							12.1125	11.8734							12.188	12.021
	1	1.50608				11.691					11.675								11.8064								12.007
	1	1.47766				11.667					11.605								11.7015								11.868
	1	1.75649			shh	29.9274	29.9241	18.2665			28.9882	29.1552	17.3825	-0.883955	0.883955	1.84543			29.4074	29.1137	17.534	-0.732454	0.732454	1.66146			29.379	29.5393	17.358	-0.908459	0.908459	1.87704
	1	1.48492				29.9795					29.196		17.5903	-0.676157	0.676157	1.59788			29.4801		17.6067	-0.659757	0.659757	1.57982			29.544		17.523	-0.743459	0.743459	1.67419
	1	1.23764				29.8655					29.2813		17.6757	-0.590796	0.590796	1.50608			28.4534		16.58	-1.68645	1.68645	3.21864			29.695		17.674	-0.592459	0.592459	1.50781
	1	1.75478		experiment group 2	gapdh	11.3852	11.3916				11.9729	11.7497							11.9203	11.8245
	1	1.74777				11.3362					11.6708								11.7819
	1	1.4669				11.4533					11.6055								11.7713
	1	1.18614			shh	29.415	29.669	18.2774			29.4638	29.3783	17.7141	-0.563312	0.563312	1.47766			29.5266	29.7802	17.7021	-0.575303	0.575303	1.48999
		1.66146				30.059					29.2144		17.4647	-0.812698	0.812698	1.75649			29.6332		17.8087	-0.468755	0.468755	1.38391
		1.57982				29.533					29.4568		17.707	-0.570381	0.570381	1.48492			30.1807		18.3562	0.0787725	-0.0787725	0.946863
		3.21864		experiment group 3	gapdh	11.2026	11.1923				11.622	11.5317							11.8416	11.6783
		1.48999				11.0874					11.432								11.6274
		1.38391				11.2869					11.541								11.5659
		0.946863			shh	29.2204	29.4899	18.2976			29.5217	29.1878	17.99	-0.30759	0.30759	1.23764			29.617	29.688	17.9387	-0.35887	0.35887	1.28242
		1.28242				29.6239					29.018		17.4863	-0.811294	0.811294	1.75478			29.7138		18.0355	-0.262081	0.262081	1.19921
		1.19921				29.6254					29.0238		17.4921	-0.805513	0.805513	1.74777			29.7333		18.055	-0.242598	0.242598	1.18312
		1.18312		experiment group 4	gapdh	11.2131	17.2846				11.8881	17.5554							11.4866	17.5249
		0.895928				11.3476					11.6917								11.3207
		1.03853			shh	29.2932	29.3685	12.0838			29.0865	29.2397	11.5311	-0.552773	0.552773	1.4669			29.7672	29.6607	12.2424	0.158545	-0.158545	0.895928
		1.87704				29.4438					29.393		11.8376	-0.246279	0.246279	1.18614			29.5542		12.0293	-0.0545387	0.0545387	1.03853
		1.67419
		1.50781
