# Supplementary material for: The scale of zebrafish pectoral fin buds is determined by intercellular K+ levels and consequent Ca2+-mediated signaling via retinoic acid regulation of Rcan2 and Kcnk5b
Source: PLoS Biol. 2024 Mar 25;22(3):e3002565. doi: 10.1371/journal.pbio.3002565 (PMC11018282; doi:10.1371/journal.pbio.3002565)
Supplement: S8 Data — (XLSX) [file pbio.3002565.s008.xlsx]

## Sheet: Suppl Fig. 1Aa
	Current Changes in HEK cells associated with mCherry or Kcnk5b-mCherry expression
		mCherry Positive Cells							Kcnk5b-mCherry Postive Cells
	voltage	cell1	cell2	cell3	cell4	cell5	cell6		cell1	cell2	cell3	cell4	cell5	cell6
Measured current/Cell Capacitance	-80	-5.20902	-4.74346	-2.691	-3.72169	-3.9492	-2.41161		-8.94805	-4.36963	-8.167	-4.274	-6.143	-5.76617
(picoAmp/picoFarad)	-60	-4.17327	-3.69051	-1.55363	-2.37667	-2.98902	-1.95514		-10.4491	-3.53529	-7.84349	-3.7768	-5.85103	-6.66263
	-40	-3.13396	-2.70626	-1.06765	-1.41265	-2.11716	-1.49423		-8.48566	-3.2143	-6.50168	-2.52609	-6.26806	-6.40369
	-20	-2.17112	-1.85018	-0.573729	-0.962877	-1.36313	-1.05947		-3.05456	-2.73267	-3.63944	0.772122	-6.05275	-3.53644
	0	-1.06442	-1.05682	0.102398	-0.610591	-0.630682	-0.625682		5.43237	-1.75461	-0.625578	8.51896	-3.59079	2.29264
	20	0.0808899	-0.269661	1.14957	-0.217927	0.183776	-0.230414		15.0183	-0.00195273	6.71633	20.0079	1.56814	10.7326
	40	1.56993	0.901444	3.16644	0.319981	1.82258	0.281838		24.2409	2.73203	15.0068	32.2095	9.01747	21.2448
	60	3.34189	2.95362	4.65716	1.54816	2.63878	1.0631		32.1364	6.3842	24.391	40.647	18.041	33.0238
	80	4.62543	5.05799	5.78785	3.07572	3.57242	1.51194		37.863	10.777	34.1173	37.8032	27.8046	44.0262
Cell Capacitance	picoFarad	22.49	11.97	33.81	17.21	14.69	14.45		33.81	21.3	39.66	21.5	51.25	26.29
Measured Current at indicated voltage
-80mV	picoAmpere 1	-117.151	-56.7792	-90.9827	-64.0503	-58.0137	-34.8478		-8.94805	-4.36963	-8.167	-4.274	-6.143	-5.76617
-60mV	picoAmpere 2	-93.8568	-44.1754	-52.5281	-40.9024	-43.9087	-28.2518		-10.4491	-3.53529	-7.84349	-3.7768	-5.85103	-6.66263
-40mV	picoAmpere 3	-70.4828	-32.3939	-36.0971	-24.3117	-31.1011	-21.5916		-8.48566	-3.2143	-6.50168	-2.52609	-6.26807	-6.40369
-20mV	picoAmpere 4	-48.8286	-22.1467	-19.3978	-16.5711	-20.0244	-15.3093		-3.05456	-2.73267	-3.63944	0.772122	-6.05275	-3.53644
0mV	picoAmpere 5	-23.9388	-12.6502	3.46208	-10.5083	-9.26472	-9.0411		5.43237	-1.75461	-0.625578	8.51896	-3.59079	2.29264
20mV	picoAmpere 6	1.81921	-3.22784	38.8669	-3.75053	2.69967	-3.32948		15.0183	-0.00195273	6.71632	20.0079	1.56814	10.7326
40mV	picoAmpere 7	35.3078	10.7903	107.057	5.50688	26.7737	4.07256		24.2409	2.73203	15.0068	32.2095	9.01747	21.2448
60mV	picoAmpere 8	75.1592	35.3548	157.458	26.6439	38.7638	15.3618		32.1364	6.3842	24.391	40.647	18.041	33.0238
80mV	picoAmpere 9	104.026	60.5442	195.687	52.9332	52.4789	21.8475		37.863	10.777	34.1173	37.8032	27.8046	44.0262

## Sheet: Suppl Fig 1Ab
	FLIM-FRET KIRIN1 1/Lifetime (ns-1)
	KIRIN1 + mCherry						KIRIN1+ Kcnk5b-mCherry
	cell1	cell2	cell3	cell4	cell5	cell6	cell1	cell2	cell3	cell4	cell5	cell6
	0.478469	0.454545	0.384615	0.406504	0.462963	0.395257	0.309598	0.31348	0.34965	0.30303	0.301205	0.333333

## Sheet: Suppl. Fig. 1B
	FLIM-FRET Measurements KIRIN 1/Lifetime (ns-1)
	Kirin1 +mCherry +DMSO	Kirin1 +Kcnk5b-mCherry +DMSO	Kirin1 +Kcnk5b-mCherry +FK506
	0.558659	0.3367	0.47619
	0.52356	0.346021	0.454545
	0.512821	0.357143	0.454545
	0.694444	0.344828	0.471698
	0.675676	0.338983	0.454545
	0.671141	0.344828	0.446429
	0.591716	0.331126	0.458716
	0.588235	0.333333	0.45045
	0.595238	0.33557	0.454545

## Sheet: Suppl. Fig. 1C
		FLIM Measurements of different Kcnk5b activities 1/Lifetime (ns-1) (fold change)						FLIM measurements					fold conversion to average FLIM of mCherry (3.11)
		Kcnk5bS345A	Kcnk5bWT	Kcnk5bS345E				mCherry	Kcnk5bS345A-mCherry	Kcnk5b-mCherry	Kcnk5bS345E-mCherry		Kcnk5bS345A-mCherry	Kcnk5b-mCherry	Kcnk5bS345E-mCherry
		1.09003	1.06752	1.05788				3.13	3.39	3.32	3.29		1.09003	1.06752	1.05788
		1.04823	1.03215	1.06109				3.01	3.26	3.21	3.3		1.04823	1.03215	1.06109
		1.06431	1.07074	1.09003				3.1	3.31	3.33	3.39		1.06431	1.07074	1.09003
		1.06109	1.02894	1.05145				3.07	3.3	3.2	3.27		1.06109	1.02894	1.05145
		1.08039	1.05145	1.06752				3.11	3.36	3.27	3.32		1.08039	1.05145	1.06752
		1.06752	1.06109	1.06109				3.15	3.32	3.3	3.3		1.06752	1.06109	1.06109
		1.02251	1.02894	1.0836				3.06	3.18	3.2	3.37		1.02251	1.02894	1.0836
		1.06752	1.00321	1.09003				3.14	3.32	3.12	3.39		1.06752	1.00322	1.09003
		1.01608	1.03215	1.07074				3.1	3.16	3.21	3.33		1.01608	1.03215	1.07074
		0.977492	1.05788	1.07395				3.09	3.04	3.29	3.34		0.977492	1.05788	1.07395
		0.993569	1.08682	1.08039				3.05	3.09	3.38	3.36		0.993569	1.08682	1.08039
		0.980707	1.03215	1.10611				3.02	3.05	3.21	3.44		0.980707	1.03215	1.10611
		1.02251	1.02572	1.10932				3.2	3.18	3.19	3.45		1.02251	1.02572	1.10932
		1.02894	1.05788	1.09325				3.25	3.2	3.29	3.4		1.02894	1.05788	1.09325
		1.03859	1.03537	1.1254				3.17	3.23	3.22	3.5		1.03859	1.03537	1.1254
		1.0418	0.96732	1.06109					3.24		3.3		1.0418		1.06109
		1.02894	0.971678	1.07395					3.2		3.34		1.02894		1.07395
		0.958606	0.980392	0.989107					3.33		3.3
		0.962963	1.01089	1.11111			average	3.11
		0.96732	0.958606	1.1024
		0.958606	0.980392	1.11983				FLIM measurements					fold conversion to average FLIM of mCherry (2.294506)
		0.997821	1.32462	1.26362				mCherry	Kcnk5bS345A-mCherry	Kcnk5b-mCherry	Kcnk5bS345E-mCherry		Kcnk5bS345A-mCherry	Kcnk5b-mCherry	Kcnk5bS345E-mCherry
		0.941176	1.30719	1.26362				2.31	2.2	2.22	2.27		0.958606	0.96732	0.989107
		0.936819	1.35076	1.2854				2.28	2.21	2.23	2.55		0.962963	0.971678	1.11111
		0.958606	1.01525	1.39869				2.32	2.22	2.25	2.53		0.96732	0.980392	1.1024
		0.96732	1.00218	1.34641				2.2	2.2	2.32	2.57		0.958606	1.01089	1.11983
		1.00218	0.949891	1.35076				2.28	2.29	2.2	2.9		0.997821	0.958606	1.26362
		0.989107	0.962963	0.971678				2.25	2.16	2.25	2.9		0.941176	0.980392	1.26362
		0.971678	0.954248	0.958606				2.25	2.15	3.04	2.95		0.936819	1.32462	1.2854
		0.945534		0.984749				2.27	2.2	3	3.21		0.958606	1.30719	1.39869
		0.949891		0.976035				2.26	2.22	3.1	3.09		0.96732	1.35076	1.34641
		0.941176		1.35076				2.28	2.3	2.33	3.1		1.00218	1.01525	1.35076
				1.33333				2.41	2.27	2.3	2.23		0.989107	1.00218	0.971678
				1.39869				2.47	2.23	2.18	2.2		0.971678	0.949891	0.958606
				1.23747				2.4	2.17	2.21	2.26		0.945534	0.962963	0.984749
				1.25055				2.33	2.18	2.19	2.24		0.949891	0.954248	0.976035
				1.32026				2.21	2.16		3.1		0.941176		1.35076
								2.26			3.06				1.33333
								2.23			3.21				1.39869
											2.84				1.23747
											2.87				1.25054
											3.03				1.32026
							average	2.29471

## Sheet: Suppl. Fig. 1D
		FLIM-FRET Measurements of KIRIN1 Sensor 1/Lifetime (ns-1)-Ectoderm
		32-35 hpf	38-42 hpf	46-48 hpf	54-56 hpf
		0.38059	0.333704	0.363636	0.383142
		0.398936	0.338983	0.401606	0.386997
		0.45977	0.385109	0.367512	0.39801
		0.569801	0.343643	0.36049	0.32
		0.454545	0.319829	0.432432	0.399361
		0.43573	0.333333	0.351185	0.422627
		0.378788	0.374532	0.31362	0.463822
		0.458015	0.398936	0.381679	0.400534
		0.42735	0.41958	0.366972	0.437956
		0.420757	0.465838	0.45045	0.321199
		0.429185	0.509338	0.388601	0.394218
		0.429185	0.511945	0.316456	0.385109
		0.530035	0.326797	0.365408	0.397878
		0.496278	0.404313	0.432277	0.547445
		0.444444	0.456621	0.35545	0.377834
		0.497512	0.375587	0.36452	0.479233
		0.491803	0.405405	0.353774	0.447761
		0.439883	0.321543	0.406504	0.461538
		0.530035	0.372671	0.416089	0.547445
		0.491803	0.329308	0.359281	0.519031
		0.36452	0.408163	0.385604	0.557621
		0.402145	0.327869	0.444444
		0.416667	0.321199	0.491803
		0.391134	0.339751	0.487013
		0.442478	0.4329	0.499168
		0.326797	0.349243
		0.350467	0.441176
		0.416089	0.497512
		0.404313	0.595238
		0.519031	0.488599
		0.483871

## Sheet: Suppl. Fig. 1E
		FLIM-FRET Measurements of KIRIN1 Sensor 1/Lifetime (ns-1)-Mesenchyme
		32-35 hpf	38-42 hpf	46-48 hpf	54-56 hpf
		0.344234	0.323799	0.332594	0.340368
		0.360144	0.324851	0.3465	0.373972
		0.351494	0.336323	0.335121	0.37234
		0.3663	0.309278	0.332005	0.312134
		0.347947	0.310238	0.352941	0.365726
		0.365965	0.325556	0.327511	0.391083
		0.34459	0.333704	0.310973	0.406872
		0.325581	0.345423	0.358423	0.429492
		0.338219	0.353982	0.331345	0.393391
		0.469484	0.419874	0.362538	0.406835
		0.471698	0.392157	0.353201	0.313316
		0.465116	0.432277	0.318302	0.341297
		0.40107	0.319262	0.331126	0.372439
		0.42508	0.314713	0.352941	0.374298
		0.490196	0.353857	0.326976	0.46729
		0.421348	0.36036	0.353357	0.365408
		0.39557	0.320256	0.357143	0.42735
		0.431034	0.323206	0.365186	0.387597
		0.35545	0.319489	0.383632	0.393185
		0.410397	0.309917	0.328048	0.46729
		0.395648	0.324675	0.341103	0.466926
		0.393185	0.34705	0.362538	0.489396
		0.420168	0.370174	0.404585
		0.39557	0.383707	0.404858
		0.414938	0.375587	0.412088
		0.447227	0.386954
		0.409165	0.317628
		0.453515	0.331126
		0.4561	0.313644
		0.407166	0.340716
		0.452489	0.314795
		0.453515	0.311042
		0.41632	0.313152
		0.462107	0.380228
		0.453309	0.330579
		0.326584	0.373134
		0.362056	0.44843
		0.371471	0.430108
		0.365764	0.384862
		0.429923
		0.31211
		0.324254
		0.34626
		0.339213
		0.4095
		0.373413
		0.412541
