# Supplementary material for: The scale of zebrafish pectoral fin buds is determined by intercellular K+ levels and consequent Ca2+-mediated signaling via retinoic acid regulation of Rcan2 and Kcnk5b
Source: PLoS Biol. 2024 Mar 25;22(3):e3002565. doi: 10.1371/journal.pbio.3002565 (PMC11018282; doi:10.1371/journal.pbio.3002565)
Supplement: S9 Data — (XLSX) [file pbio.3002565.s009.xlsx]

## Sheet: Suppl. Fig. 2Fk
		Comparison variation in Intensity versus Consistency of FLIM Lifetime Measurements: 32 hpf
		Lifetime (ns)	Ecto low Illumination intensity	Ecto high Illumination intensity	mesen low Illumination intensity	mesen high Illumination intensity
		0	0	0	0	0
		0.10101	0	0	0	0
		0.20202	0	0	0	0
		0.30303	0	0	0	0
		0.40404	0	0	0	0
		0.505051	0	0	0	0
		0.606061	0	0	0	0
		0.707071	0.054	0	0	0
		0.808081	0	0	0	0
		0.909091	0	0	0	0
		1.0101	0.05	0	0	0
		1.11111	0.113	0	0	0
		1.21212	0.303	0.078	0	0
		1.31313	0.222	0.131	0.032	0
		1.41414	0.487	0.028	0	0
		1.51515	1.585	0.542	0.119	0.155
		1.61616	2.847	3.264	0.442	0.21
		1.71717	4.416	8.037	1.326	0.429
		1.81818	8.26	21.87	2.237	1.134
		1.91919	14.75	46.856	4.36	3.197
		2.0202	18.746	78.917	8.304	7.409
		2.12121	21.701	95.823	16.88	19.941
		2.22222	19.919	107.097	24.316	39.305
		2.32323	15.562	89.04	33.638	66.698
		2.42424	9.905	59.476	35.938	84.469
		2.52525	7.305	38.245	39.736	100.679
		2.62626	4.82	20.233	37.997	83.697
		2.72727	1.973	8.967	28.558	63.11
		2.82828	0.481	4.638	21.187	37.76
		2.92929	0.594	3.089	14.842	17.69
		3.0303	0.242	1.242	8.295	7.099
		3.13131	0	0.605	5.467	3.48
		3.23232	0	0.22	2.352	0.741
		3.33333	0	0.268	1.474	0.512
		3.43434	0	0.139	0.543	0
		3.53535	0	0.147	0.601	0
		3.63636	0	0	0.142	0
		3.73737	0	0.052	0	0
		3.83838	0	0	0	0
		3.93939	0	0.063	0.031	0
		4.0404	0	0	0	0
		4.14141	0	0	0	0
		4.24242	0	0	0.029	0
		4.34343	0	0	0	0
		4.44444	0	0	0	0
		4.54545	0	0	0	0
		4.64647	0	0	0	0
		4.74747	0	0	0	0
		4.84849	0	0	0	0
		4.94949	0	0	0	0
		5.05051	0	0	0	0
		5.15151	0	0	0	0
		5.25253	0	0	0	0
		5.35353	0	0	0	0
		5.45455	0	0	0	0
		5.55556	0	0	0	0
		5.65657	0	0	0	0
		5.75758	0	0	0	0
		5.85859	0	0	0	0
		5.9596	0	0	0	0
		6.06061	0	0	0	0
		6.16162	0	0	0	0
		6.26263	0	0	0	0
		6.36364	0	0	0	0
		6.46465	0	0	0	0
		6.56566	0	0	0	0
		6.66667	0	0	0	0
		6.76768	0	0	0	0
		6.86869	0	0	0	0
		6.9697	0	0	0	0
		7.07071	0	0	0	0
		7.17172	0	0	0	0
		7.27273	0	0	0	0
		7.37374	0	0	0	0
		7.47475	0	0	0	0
		7.57576	0	0	0	0
		7.67677	0	0	0	0
		7.77778	0	0	0	0
		7.87879	0	0	0	0
		7.9798	0	0	0	0
		8.08081	0	0	0	0
		8.18182	0	0	0	0
		8.28283	0	0	0	0
		8.38384	0	0	0	0
		8.48485	0	0	0	0
		8.58586	0	0	0	0
		8.68687	0	0	0	0
		8.78788	0	0	0	0
		8.88889	0	0	0	0
		8.9899	0	0	0	0
		9.09091	0	0	0	0
		9.19192	0	0	0	0
		9.29293	0	0	0	0
		9.39394	0	0	0	0
		9.49495	0	0	0	0
		9.59596	0	0	0	0
		9.69697	0	0	0	0
		9.79798	0	0	0	0
		9.89899	0	0	0	0
		10	0	0	0	0

## Sheet: Suppl. Fig. 2Gk
		Comparison variation in Intensity versus Consistency of FLIM Lifetime Measurements: 48 hpf
		Lifetime (ns)	Ecto. Cell Low Intensity	Ecto Cell high Intensity	Mes. Cell Low Intensity	Mes. Cell High Intensity
		0	0	0	0	0
		0.10101	0	0	0	0
		0.20202	0	0	0	0
		0.30303	0	0	0	0
		0.40404	0	0	0	0
		0.505051	0	0	0	0
		0.606061	0	0	0	0
		0.707071	0	0	0	0
		0.808081	0	0	0	0
		0.909091	0	0	0	0
		1.0101	0	0	0	0
		1.11111	0	0	0	0
		1.21212	0.147	0	0	0
		1.31313	0.044	0	0	0
		1.41414	0.091	0.088	0	0
		1.51515	0.242	0.138	0	0
		1.61616	0.45	0.374	0	0
		1.71717	0.942	1.94	0	0
		1.81818	2.846	5.44	0	0
		1.91919	5.874	10.572	0	0
		2.0202	8.936	23.215	0.685	0.16
		2.12121	16.262	38.966	1.219	0.292
		2.22222	24.955	65.981	3.994	2.08
		2.32323	28.393	95.557	10.975	8.145
		2.42424	34.56	110.117	22.633	27.368
		2.52525	28.887	107.298	39.04	61.062
		2.62626	23.148	96.721	47.624	106.865
		2.72727	14.838	65.705	50.365	130.956
		2.82828	8.988	41.725	51.976	143.521
		2.92929	5.758	17.157	34.764	109.116
		3.0303	2.87	8.3	20.695	64.507
		3.13131	0.707	4.471	10.855	33.51
		3.23232	0.628	1.004	4.487	10.729
		3.33333	0.066	0.387	2.394	4.493
		3.43434	0	0.141	0.398	0.844
		3.53535	0.095	0.173	0.211	0.144
		3.63636	0	0	0	0
		3.73737	0	0.049	0	0
		3.83838	0	0	0	0
		3.93939	0	0	0	0
		4.0404	0	0	0	0
		4.14141	0	0	0	0
		4.24242	0	0	0	0
		4.34343	0	0	0	0
		4.44444	0	0	0	0
		4.54545	0	0	0	0
		4.64647	0	0	0	0
		4.74747	0	0	0	0
		4.84849	0	0	0	0
		4.94949	0	0	0	0
		5.05051	0	0	0	0
		5.15151	0	0	0	0
		5.25253	0	0	0	0
		5.35353	0	0	0	0
		5.45455	0	0	0	0
		5.55556	0	0	0	0
		5.65657	0	0	0	0
		5.75758	0	0	0	0
		5.85859	0	0	0	0
		5.9596	0	0	0	0
		6.06061	0	0	0	0
		6.16162	0	0	0	0
		6.26263	0	0	0	0
		6.36364	0	0	0	0
		6.46465	0	0	0	0
		6.56566	0	0	0	0
		6.66667	0	0	0	0
		6.76768	0	0	0	0
		6.86869	0	0	0	0
		6.9697	0	0	0	0
		7.07071	0	0	0	0
		7.17172	0	0	0	0
		7.27273	0	0	0	0
		7.37374	0	0	0	0
		7.47475	0	0	0	0
		7.57576	0	0	0	0
		7.67677	0	0	0	0
		7.77778	0	0	0	0
		7.87879	0	0	0	0
		7.9798	0	0	0	0
		8.08081	0	0	0	0
		8.18182	0	0	0	0
		8.28283	0	0	0	0
		8.38384	0	0	0	0
		8.48485	0	0	0	0
		8.58586	0	0	0	0
		8.68687	0	0	0	0
		8.78788	0	0	0	0
		8.88889	0	0	0	0
		8.9899	0	0	0	0
		9.09091	0	0	0	0
		9.19192	0	0	0	0
		9.29293	0	0	0	0
		9.39394	0	0	0	0
		9.49495	0	0	0	0
		9.59596	0	0	0	0
		9.69697	0	0	0	0
		9.79798	0	0	0	0
		9.89899	0	0	0	0
		10	0	0	0	0

## Sheet: Suppl. Fig. 2Hk
		Comparison variation in Intensity versus Consistency of FLIM Lifetime Measurements: 56 hpf
		Lifetime (ns)	Ecto low Illumination intensity	Ecto high Illumination intensity	mesen low Illumination intensity	mesen high Illumination intensity
		0	0	0	0	0
		0.10101	0	0	0	0
		0.20202	0	0	0	0
		0.30303	0	0	0	0
		0.40404	0	0	0	0
		0.505051	0	0	0	0
		0.606061	0	0	0	0
		0.707071	0	0	0	0
		0.808081	0	0	0	0
		0.909091	0	0	0	0
		1.0101	0	0	0	0
		1.11111	0	0	0	0
		1.21212	0	0	0	0
		1.31313	0	0	0	0
		1.41414	0	0.479	0	0
		1.51515	0	1.374	0	0.095
		1.61616	0.915	5.535	0.169	0.296
		1.71717	1.127	14.197	0.294	0.305
		1.81818	6.086	27.267	0.992	1.864
		1.91919	11.454	62.132	3.959	6.681
		2.0202	15.026	75.485	7.47	17.551
		2.12121	22.203	84.408	14.462	41.553
		2.22222	25.493	79.503	21.297	65.691
		2.32323	15.308	65.51	22.71	80.713
		2.42424	10.642	39.257	23.337	79.315
		2.52525	5.298	23.347	19.246	54.574
		2.62626	2.985	13.203	11.184	30.806
		2.72727	1.013	4.1	6.267	13.686
		2.82828	0	1.968	2.107	5.155
		2.92929	0.146	0.615	0.793	2.999
		3.0303	0	0.251	0.501	0.757
		3.13131	0	0	0.111	0.116
		3.23232	0	0	0	0
		3.33333	0	0	0	0
		3.43434	0	0	0	0
		3.53535	0	0	0	0
		3.63636	0	0	0	0
		3.73737	0	0	0	0
		3.83838	0	0	0	0
		3.93939	0	0	0	0
		4.0404	0	0	0	0
		4.14141	0	0	0	0
		4.24242	0	0	0	0
		4.34343	0	0	0	0
		4.44444	0	0	0	0
		4.54545	0	0	0	0
		4.64647	0	0	0	0
		4.74747	0	0	0	0
		4.84849	0	0	0	0
		4.94949	0	0	0	0
		5.05051	0	0	0	0
		5.15151	0	0	0	0
		5.25253	0	0	0	0
		5.35353	0	0	0	0
		5.45455	0	0	0	0
		5.55556	0	0	0	0
		5.65657	0	0	0	0
		5.75758	0	0	0	0
		5.85859	0	0	0	0
		5.9596	0	0	0	0
		6.06061	0	0	0	0
		6.16162	0	0	0	0
		6.26263	0	0	0	0
		6.36364	0	0	0	0
		6.46465	0	0	0	0
		6.56566	0	0	0	0
		6.66667	0	0	0	0
		6.76768	0	0	0	0
		6.86869	0	0	0	0
		6.9697	0	0	0	0
		7.07071	0	0	0	0
		7.17172	0	0	0	0
		7.27273	0	0	0	0
		7.37374	0	0	0	0
		7.47475	0	0	0	0
		7.57576	0	0	0	0
		7.67677	0	0	0	0
		7.77778	0	0	0	0
		7.87879	0	0	0	0
		7.9798	0	0	0	0
		8.08081	0	0	0	0
		8.18182	0	0	0	0
		8.28283	0	0	0	0
		8.38384	0	0	0	0
		8.48485	0	0	0	0
		8.58586	0	0	0	0
		8.68687	0	0	0	0
		8.78788	0	0	0	0
		8.88889	0	0	0	0
		8.9899	0	0	0	0
		9.09091	0	0	0	0
		9.19192	0	0	0	0
		9.29293	0	0	0	0
		9.39394	0	0	0	0
		9.49495	0	0	0	0
		9.59596	0	0	0	0
		9.69697	0	0	0	0
		9.79798	0	0	0	0
		9.89899	0	0	0	0
		10	0	0	0	0

## Sheet: Suppl. 2O
	mesab ectoderm 35 hpf	2.18	2.4	2.18	2.19	2.07	2.18	2.17	2.2	2.17	2.14	2.09	2.01	2.3	2.24	2.3	1.87	2.08	2.07	1.89	1.9	1.98	1.85	1.93	2.14
	blebbistatin ectoderm 35 hpf	1.85	2.27	2.21	2.26	2	2	2.77	2.82	1.98	2.23	2
	mesab ectoderm 48 hpf	2.6	2.24	2.85	2.5	2.2	2.31	2.4	2.5	2.3
	blebbistatin ectoderm 48 hpf	2.5	2.6	2.8	2.5	2.6	2.8	2.3	2.9	2.29
	mesab ectoderm 56 hpf	2.08	2.01	1.95	2.05	2.2	2.1	2	2	2.03	2.1	2.1	2.2
	blebbistatin ectoderm 56 hpf	1.91	2.1	2.09	1.86	2	2.01	2.07	2.02	2.34	2.18	2.08	2.16
	mesab mesenchyme 35 hpf	2.53	2.54	2.6	2.4	2.38	2.4	2.43	2.4	2.48	2.38	2.33	2.25	2.56	2.61	2.46	2.5	2.47	2.46	2.33	2.38	2.25	2.24	2.29	2.26
	blebbistatin mesenchyme 35 hpf	2.71	2.57	2.55	2.26	2.25	2.3	2.15	2.2	2.5	2.31
	mesab mesenchyme 48 hpf	2.85	2.8	2.8	2.55	3	2.47	2.47	2.5	2.49
	blebbistatin mesenchyme 48 hpf	2.85	2.82	2.74	2.85	2.82	2.74	2.53	2.3	2.4
	mesab mesenchyme 56 hpf	2.43	2.38	2.18	2.38	2.28	2.29	2.18	2.14	2.24	2.42	2.31	2.3
	blebbistatin mesenchyme 56 hpf	2.33	2.33	2.19	2.06	2.13	2	2.2	2.14	2.21	2.49	2.47	2.4
