# Supplementary material for: The scale of zebrafish pectoral fin buds is determined by intercellular K+ levels and consequent Ca2+-mediated signaling via retinoic acid regulation of Rcan2 and Kcnk5b
Source: PLoS Biol. 2024 Mar 25;22(3):e3002565. doi: 10.1371/journal.pbio.3002565 (PMC11018282; doi:10.1371/journal.pbio.3002565)
Supplement: S10 Data — (XLSX) [file pbio.3002565.s010.xlsx]

## Sheet: Suppl. Fig. 3D
	FLIM-FRET KIRIN1 Measurements 1/Lifetime (ns-1)
	mCherry Expressing Cells	mCherry Adjacent Cells	kcnk5b-mCherry Expressing Cells	kcnk5b Adjacent Cells
	0.446429	0.45045	0.3125	0.30303
	0.44843	0.440529	0.314465	0.30581
	0.454545	0.434783	0.314465	0.303951
	0.44843	0.45045	0.307692	0.3003
	0.440529	0.45045	0.294118	0.299401
	0.341297	0.344828	0.333333	0.30303
	0.358423	0.341297	0.301205	0.311526
	0.357143	0.342466	0.314465	0.3125
	0.337838	0.346021	0.314465	0.315457
	0.416667	0.34965	0.347222	0.3125
	0.392157	0.353357	0.323625	0.311526
	0.408163	0.346021	0.341297	0.307692
	0.403226	0.347222	0.343643	0.3125
	0.389105	0.348432	0.344828	0.309598
	0.357143	0.398406	0.333333	0.302115
	0.358423	0.411523		0.308642
	0.357143	0.408163		0.303951
	0.333333	0.4		0.303951
	0.338983	0.404858		0.306748
	0.346021	0.401606		0.302115
	0.393701	0.398406		0.303951
	0.383142	0.401606		0.3003
	0.4	0.403226		0.306748
	0.431034	0.4		0.301205
	0.41841	0.408163		0.3003
	0.41841	0.4		0.299401
		0.406504		0.331126
		0.403226		0.323625
		0.359712		0.328947
		0.357143		0.320513
		0.357143		0.318471
		0.355872		0.324675
		0.344828		0.3125
		0.383142		0.320513
		0.381679		0.334448
		0.378788		0.331126
		0.381679		0.334448
		0.383142		0.337838
		0.411523		0.341297
		0.414938		0.33557
		0.409836		0.340136
		0.414938		0.339443
		0.413223		0.337838
		0.425532		0.338983
		0.421941		0.340136
		0.409836		0.330033
		0.416667		0.3367
		0.408163		0.325733
		0.406504		0.333333
		0.401606		0.330033
		0.4		0.320513
				0.319489
