# Supplementary material for: The scale of zebrafish pectoral fin buds is determined by intercellular K+ levels and consequent Ca2+-mediated signaling via retinoic acid regulation of Rcan2 and Kcnk5b
Source: PLoS Biol. 2024 Mar 25;22(3):e3002565. doi: 10.1371/journal.pbio.3002565 (PMC11018282; doi:10.1371/journal.pbio.3002565)
Supplement: S11 Data — (XLSX) [file pbio.3002565.s011.xlsx]

## Sheet: Suppl. Fig 4A
	kcnk5b qRT-PCR
	AB Heat Shock	1	1	1	1	1	1	1	1	1
	kcnk5b Heat Shock	11.8637	13.0891	8.64007	3.60688	3.59541	4.28366	25.0627	13.963	20.0126

## Sheet: Suppl. Fig. 4F
	Non-Tg 32 hpf	GFP-Tg 32 hpf	Kcnk5b-Tg 32 hpf	Kcnk10-Tg 32 hpf	Non-Tg 48 hpf	GFP-Tg 48 hpf	Kcnk5b-Tg 48 hpf	Kcnk10-Tg 48 hpf	Non-Tg 56 hpf	GFP-Tg 56 hpf	Kcnk5b-Tg 56 hpf	Kcnk10-Tg 56 hpf
	0.83384	0.796095	1.08764	0.886186	0.79398	0.960046	1.22026	0.952557	0.806843	0.822585	0.993502	1.1252
	0.468152	0.628958	0.921865	1.41432	0.6259	0.901868	1.10443	1.07524	0.919515	1.0628	1.1405	0.932695
	0.563474	0.611273	0.938456	1.0625	0.81788	0.759781	1.50485	0.663843	0.711098	0.88006	1.13733	0.803175
	0.662461	0.794821	0.759898	0.683222	0.765398	0.562955	1.12616	0.978313	0.761384	1.01691	1.12998	1.01268
	0.677181	0.879636	0.808647	1.01818	0.529384	0.860046	1.32978	1.06909	0.727486	0.697648	1.02053	1.15798
	0.890012	0.689918	0.893353	0.493509	0.634487	0.701868	1.21748	1.06298	0.858326	0.919515	1.00023	0.895366
	0.850161	0.944311	1.07416	1.32947	0.816918	0.972564	1.06156	0.856394	1.00337	0.727486	1.10614	0.916697
	0.58473	0.785584	0.743179	0.926839	0.672777	0.738574	0.90672	1.14709	0.999844	0.761384	0.904115	0.988174
	0.703781	0.690027	0.744603	0.806783	0.731796	0.616488	1.03234	1.14349	0.891929	0.711098	0.818194	1.12157
	0.814509	0.598363	0.716266	0.711882	0.704456	0.744603	1.73107	1.04453	1.10614		0.823644	0.812289
	0.645665	0.640728	1.11758	1.51055	0.826302	0.464817	0.893528	0.772166	0.904115		1.28375	1.34021
	0.83042		0.685201	1.26644	0.736725	0.716266	0.696889	1.1691	0.818194		1.36606	0.955926
	0.794268		1.13798	1.62525	0.649908	0.617584	0.840776	1.1447	0.823644		1.21657	1.06082
	0.636939		1.03453	1.02409	0.745187	0.559898	1.00022	0.921682	1.28375		1.09702	1.19204
	0.838672		1.10954	0.931419	0.556499	0.66398	0.778926	1.60613	0.79398		1.48708	1.01584
	0.644028		1.06739	1.1384	0.662345	0.998559	0.992264	0.996655	0.6259		1.15609	1.1103
	0.750729		1.00036	1.28741	0.805638	0.699366	0.618178	0.720934	0.81788		1.31204	1.23501
	0.865681		1.03453		0.806999	0.793706	1.52505	0.912365			1.12166	1.30298
	0.866327				0.892169	0.938967	1.22026				1.08795	1.15929
	0.570663				0.929459		1.32978					1.08195
	0.899887				0.963608		2.14429					0.630545
	0.931589				0.830707		1.0063
	0.892741				0.779082		0.685147
	0.806105				0.886668		1.04841
	0.878392				0.878907		0.902954
	0.780851				0.703339		1.24959
					0.652024		1.71743
					0.670545		0.804887
					0.734048		1.10443
					0.761038		1.02078
					0.89546		1.06156
					0.769596		0.561962
					0.902906		1.21748
					0.622582		0.931607
					0.929396		0.994724
					0.669403		0.834358
					0.752524		1.12616
					0.958074		1.50485
							0.95962
							0.872377
							0.954122
							0.978852
							0.940331
							0.970353
	32				48				56
	AB fin Area	AB Otic Vesicle Area	AB ratio		AB fin Area	AB Otic Vesicle Area	AB ratio		AB fin Area	AB Otic Vesicle Area	AB ratio
	20993.3	106422	0.83384		16731.9	21073.5	0.79398		96330.4	119392	0.806843
	9432.85	132923	0.468152		10142	16203.9	0.6259		96694.2	105158	0.919515
	20487.7	115909	0.563474		15808.9	19329.1	0.81788		72411.4	101831	0.711098
	1529.19	107755	0.662461		23734.5	31009.4	0.765398		87709.6	115198	0.761384
	8461.71	80319	0.677181		16349	30883	0.529384		80504.9	110662	0.727486
	17193.5	89723.4	0.890012		18974	29904.5	0.634487		184363	214794	0.858326
	17250.5	20290.9	0.850161		21731.1	26601.3	0.816918		185719	185096	1.00337
	13353	22836.2	0.58473		18577.5	27613.2	0.672777		155998	156022	0.999844
	9782.24	13899.5	0.703781		24217.1	33092.7	0.731796		156463	175421	0.891929
	13236.2	16250.5	0.814509		20569.5	29199.2	0.704456		117718	106422	1.10614
	13035.4	20189.1	0.645665		22277.4	26960.4	0.826302		120178	132923	0.904115
	15625.1	18815.9	0.83042		21005.9	28512.6	0.736725		94835.9	115909	0.818194
	12061	15185	0.794268		19972.1	30730.7	0.649908		88751.6	107755	0.823644
	9770.2	15339.3	0.636939		24998	33546	0.745187		103110	80319	1.28375
	14523.3	17317.1	0.838672		20915	37583.1	0.556499		167319	210735	0.79398
	12830.9	19922.9	0.644028		27196.7	41061.3	0.662345		101420	162039	0.6259
	10521.3	14014.8	0.750729		26028.2	32307.5	0.805638		158089	193291	0.81788
	14532.7	16787.6	0.865681		24479	30333.4	0.806999
	16115.4	18602	0.866327		25832.4	28954.5	0.892169
	8731.27	15300.2	0.570663		26618.5	28638.7	0.929459
	16605.9	18453.3	0.899887		32491.3	33718.3	0.963608
	17168	18428.7	0.931589		27454.2	33049.1	0.830707
	15718	17606.4	0.892741		26337.7	33806.1	0.779082
	13256.9	16445.6	0.806105		31861.5	35934	0.886668
	15648.6	17815	0.878392		28155.8	32035	0.878907
	14823.1	18983.2	0.780851		24344.6	34612.9	0.703339
					26702.1	40952.6	0.652024
					29082.4	43371.3	0.670545
					21590.2	29412.5	0.734048
					32911.2	43245.2	0.761038
					39680.9	44313.4	0.89546
					25411.4	33019.1	0.769596
					30377	33643.6	0.902906
					23873.8	38346.3	0.622582
					33720.6	36282.3	0.929396
					23799.6	35553.5	0.669403
					23880.9	31734.5	0.752524
					33984.1	35471.2	0.958074
	GFP-Tg fin Area	GFP-Tg Otic Vesicle Area	GFP-Tg ratio		GFP-Tg fin Area	GFP-Tg Otic Vesicle Area	GFP-Tg ratio		GFP-Tg fin Area	GFP-Tg Otic Vesicle Area	GFP-Tg ratio
	17743.7	22288.4	0.796095		53003.4	55209.2	0.960046		85275.1	103667	0.822585
	27432.2	43615.2	0.628958		54528	60461.1	0.901868		93193.6	87686.7	1.0628
	14987.7	24518.9	0.611273		55313.8	72802.4	0.759781		85528.2	97184.6	0.88006
	22846.4	28744.1	0.794821		52968.9	94090.8	0.562955		97680.2	96056.3	1.01691
	26863.4	30539.2	0.879636		52396.2	60922.6	0.860046		74879.3	107331	0.697648
	22515.4	32634.9	0.689918		50986.8	72644.5	0.701868		95587.7	103955	0.919515
	25687.5	27202.4	0.944311		48343	49706.7	0.972564		94768.8	130269	0.727486
	20625.2	26254.7	0.785584		54296.4	73515.1	0.738574		94361.8	123935	0.761384
	18594.9	26948.1	0.690027		49410.8	80149.4	0.616488		92787.7	130485	0.711098
	21699.6	36265	0.598363		44687.1	60014.6	0.744603
	22382.6	34933	0.640728		42453.1	91333	0.464817
					50846.7	70988.6	0.716266
					53856.4	87205	0.617584
					44853.1	80109.4	0.559898
					49078.9	73916.2	0.66398
					60427.3	60514.5	0.998559
					55935.7	79980.6	0.699366
					59685	75197.8	0.793706
					59806.2	63693.6	0.938967
	kcnk5b-Tg fin Area	kcnk5b-Tg Otic Vesicle Area	kcnk5b-Tg ratio		kcnk5b-Tg fin Area	kcnk5b-Tg Otic Vesicle Area	kcnk5b-Tg ratio		kcnk5b-Tg fin Area	kcnk5b-Tg Otic Vesicle Area	kcnk5b-Tg ratio
	27717.9	25484.4	1.08764		154001	126204	1.22026		177301	178460	0.993502
	20177.6	21887.9	0.921865		149207	135099	1.10443		210219	184322	1.1405
	34835.9	37120.5	0.938456		173139	115053	1.50485		254203	223508	1.13733
	58751.6	77315	0.759898		173163	153765	1.12616		204035	180564	1.12998
	33109.7	40944.5	0.808647		142088	106851	1.32978		171353	167907	1.02053
	32568	36455.9	0.893353		187652	154132	1.21748		195214	195169	1.00023
	15465	14397.4	1.07416		148703	140080	1.06156		117718	106422	1.10614
	10983.4	14778.9	0.743179		88361.3	31279	0.90672		120178	132923	0.904115
	54402.8	73062.8	0.744603		85188.1	34085.8	1.03234		94835.9	115909	0.818194
	36851.6	51449.6	0.716266		111841	18393.8	1.73107		88751.6	107755	0.823644
	64225.8	57468.4	1.11758		81865.9	35662.9	0.893528		103110	80319	1.28375
	23363.4	34097.2	0.685201		103555	33800.7	0.696889		122568	89723.4	1.36606
	44525.8	39127	1.13798		83466.4	27910.4	0.840776		154001	126585	1.21657
	58386.8	56438.1	1.03453		88552.2	26546.3	1.00022		149207	136012	1.09702
	49733.7	44823.8	1.10954		93972.5	35911.6	0.778926		173139	116429	1.48708
	60233.8	56430.6	1.06739		126460	127446	0.992264		173163	149784	1.15609
	46925	46907.8	1.00036		122713	198508	0.618178		142088	108295	1.31204
	58386.8	56438.1	1.03453		138691	90941.6	1.52505		187652	167298	1.12166
					128217	105074	1.22026		148703	136683	1.08795
					129057	97051.9	1.32978
					92426.9	43103.7	2.14429
					133156	132322	1.0063
					114151	166608	0.685147
					117911	112466	1.04841
					119965	132859	0.902954
					126242	101027	1.24959
					137781	80224.9	1.71743
					120372	149552	0.804887
					128041	115934	1.10443
					126981	124395	1.02078
					126039	118730	1.06156
					114454	203668	0.561962
					133574	109714	1.21748
					123761	132847	0.931607
					132674	133378	0.994724
					129344	155022	0.834358
					136476	121187	1.12616
					85676.5	56933.4	1.50485
					132132	137692	0.95962
					127887	146596	0.872377
					130008	136260	0.954122
					129714	132516	0.978852
					133498	141969	0.940331
					132919	136980	0.970353
	kcnk10-Tg fin Area	kcnk10-Tg Otic Vesicle Area	kcnk10-Tg ratio		kcnk10-Tg fin Area	kcnk10-Tg Otic Vesicle Area	kcnk10-Tg ratio		kcnk10-Tg fin Area	kcnk10-Tg Otic Vesicle Area	kcnk10-Tg ratio
	73094.5	82482.2	0.886186		87699.8	92067.8	0.952557		170102	151176	1.1252
	88870.1	62835.8	1.41432		111372	103578	1.07524		125060	134085	0.932695
	80177.7	75461.3	1.0625		86854.6	130836	0.663843		118209	147178	0.803175
	52307.1	76559.4	0.683222		91429.4	93456.2	0.978313		146163	144333	1.01268
	67502.2	66297.2	1.01818		111001	103827	1.06909		165156	142625	1.15798
	31037	62890.4	0.493509		109456	102971	1.06298		125468	140130	0.895366
	69981.5	52638.5	1.32947		91849.1	107251	0.856394		154595	168644	0.916697
	70663.5	76241.4	0.926839		120027	104635	1.14709		135987	137615	0.988174
	48756.4	60433.1	0.806783		104924	91757.3	1.14349		156194	139263	1.12157
	45404.1	63780.4	0.711882		112776	107968	1.04453		149897	184537	0.812289
	92359.2	61142.7	1.51055		86286	111745	0.772166		167501	124981	1.34021
	68871.7	54382.1	1.26644		115392	98702.3	1.1691		130318	136326	0.955926
	48603.8	29905.4	1.62525		147816	129131	1.1447		121696	114719	1.06082
	68866	67246.3	1.02409		108143	117332	0.921682		145077	121705	1.19204
	55421.7	59502.5	0.931419		166457	103638	1.60613		105773	104123	1.01584
	68063.9	59789.3	1.1384		123798	124213	0.996655		135115	121692	1.1103
	85432.8	66360	1.28741		80844.1	112138	0.720934		183448	148540	1.23501
					96020.4	105243	0.912365		179430	137707	1.30298
									184539	159183	1.15929
									183164	169291	1.08195
									112619	178606	0.630545
