# Supplementary material for: The scale of zebrafish pectoral fin buds is determined by intercellular K+ levels and consequent Ca2+-mediated signaling via retinoic acid regulation of Rcan2 and Kcnk5b
Source: PLoS Biol. 2024 Mar 25;22(3):e3002565. doi: 10.1371/journal.pbio.3002565 (PMC11018282; doi:10.1371/journal.pbio.3002565)
Supplement: S12 Data — (XLSX) [file pbio.3002565.s012.xlsx]

## Sheet: Suppl. Fig. 5A
Expression Levels of kcnk5b expression
DMSO	1	1	1	1	1	1	1	1	1
Retinoic Acid	1.0741	1.07676	0.921453	0.427496	0.490493	0.412757	0.569657	0.572244	0.599202
	dmso	CT	CT mean	delta CT mean		RA	CT	CT mean	delta CT mean	delta CT	minus delta CT	fold change
1	b-actin	19.9894	20				17.8448	17.7667
		20.1451					18.1298
		19.8656					17.3255
	kcnk5b	27.1458	27.332	7.332			24.9956	25.0681	7.22888	-0.103125	0.103125	1.0741
		27.4403					24.992		7.2253	-0.106699	0.106699	1.07676
		27.4099					25.2167		7.45002	0.118017	-0.118017	0.921453
2	b-actin	17.3602	16.8153				17.9797	17.8154
		16.6867					17.5014
		16.3989					17.9651
	kcnk5b	23.6119	23.6759	6.86061			25.902	25.8528	8.08662	1.22602	-1.22602	0.427496
		23.6278					25.7037		7.8883	1.0277	-1.0277	0.490493
		23.7879					25.9527		8.13724	1.27663	-1.27663	0.412757
3	b-actin	26.7507	26.3481				27.2124	27.1201
		26.2402					26.9995
		26.0533					27.1485
	kcnk5b	24.5349	24.4083	-1.93979			25.9922	25.9657	-1.12795	0.811834	-0.811834	0.569657
		24.4141					25.9856		-1.13449	0.805298	-0.805298	0.572244
		24.2759					25.9192		-1.2009	0.738886	-0.738886	0.599202

## Sheet: Suppl. Fig. 5B
	Fold Expression of cyp26a1
	DMSO	RA		cyp26a1	dmso	CT	CT mean	delta CT mean		RA	CT	CT mean	delta CT mean	delta CT	minus delta CT	fold change
	1	5.54961		1	b-actin	30.7596	30.4203				32.5599	32.4387
	1	16.87				30.4758					32.6945
	1	1.3721				30.0255					32.0616
	1	29.185			cyp26a1	34.969	33.948	3.52772			33.494	33.6313	1.05533	-2.47239	2.47239	5.54961
	1	47.3629				32.927					31.89		-0.548669	-4.07639	4.07639	16.87
	1	27.9968									35.51		3.07133	-0.456387	0.456387	1.3721
				2	b-actin	16.0944	16.0656				19.0149	18.9094
						15.9314					18.708
						16.171					19.0052
					cyp26a1	24.1943	24.2344	8.16875			22.2109	21.9981	3.30159	-4.86716	4.86716	29.185
						24.2464					21.5124		2.60307	-5.56568	5.56568	47.3629
						24.2625					22.2709		3.36156	-4.80719	4.80719	27.9968

## Sheet: Suppl. Fig 5C
		DMSO ectoderm	Thyroid Hormone ectoderm	DMSO mesoderm	Thyroid Hormone mesoderm
		0.357143	0.357143	0.302115	0.31348
		0.4	0.371747	0.296736	0.31348
		0.374532	0.357143	0.3003	0.318471
		0.37037	0.380228	0.3125	0.320513
		0.357143	0.369004	0.322581	0.333333
		0.384615	0.374532	0.318471	0.30303
		0.357143	0.344828	0.295858	0.288184
		0.369004	0.352113	0.31348	0.322581
		0.357143	0.363636	0.296736	0.298507
		0.344828	0.352113	0.319489	0.311526
		0.37037	0.37037	0.307692	0.310559
		0.34965	0.357143	0.3125	0.303951
		0.357143	0.526316	0.3003	0.304878
		0.3663	0.558659	0.30303	0.30303
		0.454545	0.49505	0.331126	0.304878
		0.45045	0.403226	0.30581	0.347222
		0.37037	0.383142	0.31348	0.340136
		0.549451	0.429185	0.306748	0.343643
		0.454545		0.315457	0.331126
		0.625		0.344828	0.333333
		0.641026		0.350877	0.378788
		0.555556		0.357143	0.318471
				0.338983	0.326797
				0.344828	0.311526
				0.4
				0.416667
				0.41841

## Sheet: Suppl. Fig. 5D
	in situ signal intensity
	DMSO	RA
	19.816	58.798
	21.39	65.66
	46.021	66.612
	56.084	68.158
	43.857	64.392
	27.198	57.161
	50.848	58.635
	42.119	62.106
	28.711	51.897
	42.036	56.38
		56.231
		68.451
		69.573

## Sheet: Suppl. Fig. 5E
	Fold Expression of rcan2 or dio3b						1	DMSO			TH3
	DMSO		Thyroid Hormone					Ct Mean	Delta Ct Mean		Ct Mean	Delta Ct Mean	Delta Ct Mean after minus before	minus Delta Ct	fold change
	rcan2	dio3b	rcan2 (set 1)	rcan2 (set 2)	dio3b		ef1a	14.2079			14.501
	1	1	0.531368	0.699441	3.01589
	1	1	0.838369	0.764087	4.41846		rcan2-2	23.5546	9.3467		24.7599	10.2589	0.912217	-0.912217	0.531368
	1	1	1.14648	1.2678	2.74393
	1	1	0.70028	0.75911	1.69153		rcan2-3	24.4395	10.2316		25.2483	10.7473	0.515725	-0.515725	0.699441
	1	1	0.513994	0.587273	3.18739
	1	1	0.425062	0.481211	3.00664		DIO3B	24.6151	10.4072		23.3155	8.81459	-1.59259	1.59259	3.01589
							2	DMSO			TH3
								Ct Mean	Delta Ct Mean		Ct Mean	Delta Ct Mean	Delta Ct Mean after minus before	minus Delta Ct	fold change
							ef1a	14.2074			14.1726
							rcan2-2	24.29	10.0827		24.5097	10.337	0.254343	-0.254343	0.838369
							rcan2-3	24.3958	10.1885		24.7493	10.5767	0.388191	-0.388191	0.764087
							DIO3B	24.3649	10.1575		22.1866	8.01394	-2.14355	2.14355	4.41846
							3	DMSO			TH3
								Ct Mean	Delta Ct Mean		Ct Mean	Delta Ct Mean	Delta Ct Mean after minus before	minus Delta Ct	fold change
							ef1a	14.1663			14.2461
							rcan2-2	23.5546	9.38826		23.4372	9.19105	-0.197208	0.197208	1.14648
							rcan2-3	24.4395	10.2731		24.1769	9.9308	-0.342329	0.342329	1.2678
							DIO3B	24.6151	10.4487		23.2386	8.99249	-1.45624	1.45624	2.74393
							4	DMSO			TH3
								Ct Mean	Delta Ct Mean		Ct Mean	Delta Ct Mean	Delta Ct Mean after minus before	minus Delta Ct	fold change
							ef1a	14.1267			14.3318
							rcan2-2	24.29	10.1634		25.0092	10.6774	0.513997	-0.513997	0.70028
							rcan2-3	24.3958	10.2692		24.9986	10.6668	0.39762	-0.39762	0.75911
							DIO3B	24.3649	10.2382		23.8117	9.47986	-0.758327	0.758327	1.69153
							5	DMSO			TH3
								Ct Mean	Delta Ct Mean		Ct Mean	Delta Ct Mean	Delta Ct Mean after minus before	minus Delta Ct	fold change
							ef1a	14.218			14.4613
							rcan2-2	23.5546	9.33659		24.758	10.2968	0.960177	-0.960177	0.513994
							rcan2-3	24.4395	10.2215		25.4506	10.9894	0.767897	-0.767897	0.587273
							DIO3B	24.6151	10.3971		23.186	8.72469	-1.67237	1.67237	3.18739
							6	DMSO			TH3
								Ct Mean	Delta Ct Mean		Ct Mean	Delta Ct Mean	Delta Ct Mean after minus before	minus Delta Ct	fold change
							ef1a	14.1663			14.0892
							rcan2-2	24.29	10.1237		25.4471	11.358	1.23426	-1.23426	0.425062
							rcan2-3	24.3958	10.2295		25.374	11.2848	1.05526	-1.05526	0.481211
							DIO3B	24.3649	10.1985		22.6996	8.61037	-1.58815	1.58815	3.00664

## Sheet: Suppl. Fig. 5F
		Fold Change cyp26 expression						dmso-1				RA-6h
		DMSO treated	Retinoic Acid treated					Delta Ct Mean after minus before	minus Delta Ct			Ct Mean	Delta Ct Mean	Delta Ct Mean after minus before	minus Delta Ct	fold change
		1	46.5691				EF1A	13.9698				13.809
		1	41.7355				CYP26A1	19.6635	5.69375			13.9615	0.152451	-5.5413	5.5413	46.5691
		1	42.2108
		1	106.574
		1	62.5788				EF1A	13.9093				13.7132
		1	66.2988				CYP26A1	19.5314	5.6221			13.9521	0.238897	-5.3832	5.3832	41.7355
							EF1A	13.7571				13.6644
							CYP26A1	19.3981	5.64097			13.9058	0.241433	-5.39954	5.39954	42.2108
							EF1A	13.6576				13.7473
							CYP26A1	20.7042	7.0466			14.0581	0.310894	-6.73571	6.73571	106.574
							EF1A	13.7803				13.7234
							CYP26A1	20.4044	6.62418			14.38	0.656582	-5.9676	5.9676	62.5788
							EF1A	13.6798				13.6915
							CYP26A1	20.3463	6.66642			14.307	0.61551	-6.05091	6.05091	66.2988

## Sheet: Suppl. Fig. 5G
		FLIM-FRET Measurements KIRIN1 1/Lifetime (ns-1)
		DMSO	RA
		0.3125	0.316456
		0.37037	0.31348
		0.344828	0.320513
		0.3125	0.3125
		0.333333	0.324675
		0.344828	0.328947
		0.338983	0.322581
		0.362319	0.322581
		0.344828	0.322581
		0.344828	0.308642
		0.34965	0.333333
		0.319489	0.330033
		0.454545	0.318471
		0.446429	0.315457
		0.434783	0.324675
		0.434783	0.3125
		0.361011	0.333333
		0.341297	0.333333
		0.357143	0.322581
		0.37037	0.338983
		0.344828	0.322581
		0.357143	0.3125
		0.4	0.330033
		0.4	0.350877
		0.390625	0.344828
		0.446429	0.3367
		0.448431	0.318471
		0.434783	0.346021
		0.416667	0.371747
		0.369004	0.361011
		0.381679	0.378788
		0.384615	0.37037
		0.384615	0.340136
		0.404858	0.333333
		0.4	0.361011
		0.371747	0.334448
		0.393701	0.348432
		0.383142	0.342466
		0.362319	0.340136
		0.37037	0.353357
		0.371747	0.334448
		0.373134	0.334448
		0.37037	0.344828
		0.393701	0.369004
		0.384615	0.3663
		0.392157	0.3663
		0.384615	0.358423
		0.393701	0.361011
		0.403226	0.364964
		0.409836
		0.389105
		0.383142
		0.371747

## Sheet: Suppl. Fig. 5H
		Primers rcan2 (set1)										dmso-1				RA-6h
		DMSO-treated 6 hours	1	1	1	1	1	1				Delta Ct Mean after minus before	minus Delta Ct			Ct Mean	Delta Ct Mean	Delta Ct Mean after minus before	minus Delta Ct	fold change
		RA-treated 6 hours	3.64435	5.24879	2.47061	4.08868	3.79832	3.62857			EF1A	13.9698				13.809
											RCAN2-2	23.0964	9.12662			20.904	7.09499	-2.03164	2.03164	4.08869
											RCAN2-3	23.1434	9.1736			21.1196	7.31061	-1.86299	1.86299	3.6376
		Primers rcan2 (set2)									EF1A	13.9093				13.7132
		DMSO-treated 6 hours	1	1	1	1	1	1			RCAN2-2	22.9799	9.07061			20.8585	7.14525	-1.92536	1.92536	3.79833
		RA-treated 6 hours	4.30864	2.80408	2.85171	3.6376	3.39325	3.15312			RCAN2-3	22.9917	9.08236			21.0329	7.31969	-1.76267	1.76267	3.39326
											EF1A	13.7571				13.6644
											RCAN2-2	22.7368	8.97971			20.7847	7.12031	-1.8594	1.8594	3.62857
											RCAN2-3	22.7234	8.96626			20.9739	7.30948	-1.65678	1.65678	3.15312
											EF1A	13.6576				13.7473
											RCAN2-2	24.0978	10.4402			22.3218	8.57456	-1.86566	1.86566	3.64435
											RCAN2-3	23.7317	10.074			21.7141	7.96681	-2.10723	2.10723	4.30865
											CYP26A1	20.7042	7.0466			14.0581	0.310894	-6.73571	6.73571	106.574
											EF1A	13.7803				13.7234
											RCAN2-2	24.2011	10.4208			21.7522	8.02884	-2.39198	2.39198	5.24879
											RCAN2-3	23.2119	9.43164			21.6675	7.94411	-1.48753	1.48753	2.80408
											CYP26A1	20.4044	6.62418			14.38	0.656582	-5.9676	5.9676	62.5788
											EF1A	13.6798				13.6915
											RCAN2-2	23.3697	9.68989			22.0766	8.38503	-1.30487	1.30487	2.47061
											RCAN2-3	23.0523	9.37242			21.5521	7.86059	-1.51183	1.51183	2.85171
											CYP26A1	20.3463	6.66642			14.307	0.61551	-6.05091	6.05091	66.2988

## Sheet: Suppl. Fig. 5K
	Fold Change Rcan2 Protein Expression
	0 dpa	2 dpa	3 dpa
	1	4123.1	13014.7
	1	3966.63	14218
	1	728.922	10596.2
	1	1.80609	2576.49
	1	1.37242	20650.1
	1	6959.82	2775.41
	1	9332.52	10401.4

## Sheet: Suppl. Fig. 5V
		Fin-to-body length ratios
		day post Amp	non-Tg
		pre- Amp	0.293272	0.292322	0.282311	0.284721	0.265514	0.310634	0.274155	0.26773	0.284565	0.289015	0.278759	0.305234	0.292592	0.274149	0.283979	0.289881	0.289001	0.269394	0.27258	0.27389		0.269821	0.279179	0.286406	0.325387	0.296873	0.318877	0.317536	0.293517	0.291476	0.375577	0.303108	0.298613	0.305277	0.31759	0.264462	0.303345	0.293982
		Amp	0.083172	0.088403	0.086474	0.085925	0.08129	0.083235	0.092327	0.082645	0.102294	0.079243	0.083675	0.10209	0.08512	0.089349	0.091345	0.093789	0.098449	0.089231	0.087357	0.088601		0.094042	0.093808	0.097238	0.125286	0.133532	0.139522	0.11253	0.125865	0.099455	0.125495	0.100285	0.107601	0.102403	0.09783	0.105651	0.103772	0.110456
		7	0.174346	0.179044	0.179607	0.174482	0.186839	0.174698	0.190613	0.181943	0.207668	0.180211	0.163142	0.204761	0.180954	0.161929	0.184149	0.190549	0.199047	0.178526	0.183539	0.189434	0.184859	0.174759	0.18365
		14	0.245463	0.2492	0.237287	0.248189	0.237856	0.242337	0.238839	0.236482	0.265686	0.259967	0.230343	0.269788	0.239716	0.221619	0.23974	0.236561	0.258072	0.227616	0.244237	0.252806	0.242132	0.23513	0.231714		0.30242	0.275671	0.301253	0.275975		0.279161	0.276793	0.269639	0.289535	0.278251	0.271952	0.275381	0.273574	0.290273
		21	0.297716	0.279155	0.275188	0.293382	0.268781	0.283482	0.25527	0.266518	0.295583	0.282101	0.263751	0.29011	0.267206	0.272931	0.277074	0.267007	0.273318	0.246809	0.268486	0.276536	0.279117	0.264723	0.265012
		28	0.311518	0.287752	0.279748	0.322179	0.285596	0.302631	0.264754	0.279484	0.295069	0.303533	0.264142	0.309422	0.281284	0.267328	0.286218	0.283734	0.293001	0.262096	0.27914	0.276385	0.27324	0.281065	0.276584							0.319788	0.316476	0.3157	0.318837	0.331171	0.322222	0.299489	0.328041
		35	0.317441	0.297098	0.288759	0.330226	0.292146	0.318482	0.270888	0.288774	0.29667	0.301909	0.272789	0.323192	0.296881	0.27878	0.298093	0.284557	0.293278	0.267644	0.275176	0.287413	0.288363	0.291366	0.276327
		42	0.321885	0.298582	0.284836	0.324644	0.296439	0.325244	0.274764	0.288554	0.305036	0.31705	0.283753	0.318158	0.293835	0.293669	0.299732	0.285276	0.296054	0.268403	0.287204	0.282662	0.286016	0.289653	0.29284
		49	0.327612	0.31522	0.289002	0.3016	0.291139	0.296658	0.276963	0.282909	0.29689	0.295009	0.29601	0.2859	0.324891	0.300918		0.321861	0.292026	0.333488	0.271632	0.288829	0.317888	0.280135
		56	0.339045	0.30682		0.305875	0.287566		0.278664	0.291225	0.286485	0.294687	0.299866	0.285588	0.330535	0.309946	0.327337	0.296976	0.332807	0.275384	0.299921	0.319101	0.286411
		day post Amp	rcan2-Tg
		pre- Amp	0.308398	0.31251	0.289152	0.314847	0.278374	0.311404	0.287458	0.316332	0.293532	0.306787	0.3152	0.284793	0.292401		0.296089	0.292387	0.295951	0.302183	0.302075	0.279168	0.304286	0.288235	0.308675	0.304167	0.302675	0.326445	0.314458	0.311239	0.305802	0.323162	0.312913	0.317703	0.325871	0.329276	0.317532	0.312123	0.309067	0.330523	0.313061	0.33377	0.340756
		Amp	0.086941	0.085674	0.083438	0.085874	0.081476	0.07298	0.083097	0.075046	0.07658	0.089374	0.070891	0.081389	0.087495		0.081661	0.083961	0.100239	0.083419	0.114681	0.077568	0.076375	0.097418	0.096179	0.089173	0.091687	0.14598	0.154023	0.131639	0.160159	0.147943	0.10572	0.101265	0.106572	0.112697	0.108093	0.104576	0.10177	0.106183	0.111933	0.118031	0.121525
		7	0.184215	0.195986	0.175066	0.173322	0.183226	0.172266	0.188845	0.186691	0.175944	0.190663	0.176894	0.191637	0.17937	0.163109	0.176898	0.204205	0.180832	0.210202	0.16773	0.180679	0.190958	0.194693	0.186385	0.195521
		14	0.253103	0.275832	0.243373	0.242524	0.24358	0.249453	0.262909	0.25841	0.24227	0.256494	0.249557	0.252722	0.246172	0.245275	0.254268	0.277088	0.25423	0.263252	0.240445	0.245569	0.254411	0.260992	0.261769	0.263049	0.306105	0.295939	0.303664	0.313716	0.310602	0.317228	0.29018	0.305459	0.278872	0.320052	0.305123	0.29391	0.272087	0.287353	0.290432	0.289075	0.299498
		21	0.301449	0.300138	0.287344	0.293073	0.277711	0.288805	0.303159	0.300511	0.277037	0.292549	0.289913	0.299658	0.281611	0.287113	0.286815	0.296058	0.301233	0.287598	0.287553	0.284324	0.293558	0.294306	0.288187	0.30942
		28	0.323837	0.325679	0.299147	0.324194	0.286142	0.321507	0.321414	0.332033	0.299505	0.308005	0.296294	0.311995	0.297669	0.319527	0.317395	0.313589	0.315943	0.302583	0.299209	0.300555	0.28973	0.306195	0.312926	0.330008	0.331777	0.369402	0.329661	0.383675	0.337333	0.362896	0.347409	0.338978	0.336082	0.348885	0.363057
		35	0.326609	0.328601		0.344495		0.329813	0.335745	0.335606	0.307465	0.309782	0.312505	0.331132	0.306135	0.345624	0.324995	0.307067	0.336771	0.304248	0.313447	0.300618		0.321315	0.313948	0.348984
		42	0.328458	0.33654	0.356005	0.337381	0.340894	0.346214	0.309769	0.328887	0.314364	0.331399	0.318283	0.365419	0.331401	0.315464	0.335034	0.314754	0.317306	0.310808	0.316147	0.328311	0.361074
		49	0.348476	0.32427	0.37253	0.333106	0.321102	0.352916	0.316457	0.320897	0.318404	0.317352	0.32971	0.374102	0.333699	0.346759	0.371762	0.341801	0.343586	0.357114	0.318356	0.327431	0.306499
		56	0.344861	0.324945		0.353714	0.318471	0.346692	0.318022	0.332467	0.331604	0.321291	0.333466	0.376541	0.331516	0.347133	0.355966	0.341163	0.348233	0.359532	0.31626	0.33464	0.314717

[truncated: 1 more sheets: Suppl. Fig. 5BB]
