# Supplementary material for: The scale of zebrafish pectoral fin buds is determined by intercellular K+ levels and consequent Ca2+-mediated signaling via retinoic acid regulation of Rcan2 and Kcnk5b
Source: PLoS Biol. 2024 Mar 25;22(3):e3002565. doi: 10.1371/journal.pbio.3002565 (PMC11018282; doi:10.1371/journal.pbio.3002565)
Supplement: S13 Data — (XLSX) [file pbio.3002565.s013.xlsx]

## Sheet: Suppl. Fig. 8A
	FLIM-FRET Measurements of pcDNA6-mT2-CUTie-YFP FRET sensor for cAMP 1/Lifetime (ns-1)
	mCherry	mCherry +Forskolin	Kcnk5b
	0.346021	0.384615	0.322581
	0.344828	0.393701	0.310559
	0.343643	0.396825	0.314465
	0.326797	0.326797	0.3125
	0.330033	0.409836	0.30581
	0.318471	0.41841	0.309598
	0.307692	0.395257	0.31348
	0.328947	0.406504	0.3125		z
	0.308642	0.429185	0.316456
	0.314465	0.404858	0.37037
	0.322581	0.452489	0.33557
	0.321543	0.444444	0.341297
	0.326797	0.433276	0.319489
	0.30303	0.357143	0.31746
	0.3125	0.358423	0.323625
	0.338983	0.355872	0.330033
	0.337838	0.343643	0.33557
	0.326797	0.348432	0.358423
	0.304878	0.346021	0.363636
	0.324675	0.3367	0.3003
	0.311526	0.340136	0.322581
	0.299401	0.322581	0.299401
	0.309598	0.322581	0.334448
	0.30303	0.325733	0.3367
	0.334448	0.321543	0.338983
	0.33557	0.343643	0.323625
	0.331126	0.338983	0.327869
	0.316456	0.341297	0.326797
	0.314465	0.346021	0.3003
	0.31746	0.347222	0.3125
	0.321543	0.348432	0.30303
	0.325733	0.37037	0.326797
	0.322581	0.358423	0.323625
	0.357143	0.37037	0.319489
	0.350877	0.343643	0.331126
	0.352113	0.344828	0.337838
	0.323625	0.33557	0.3367
	0.3125	0.350877	0.34965
	0.311526	0.350877	0.344828
	0.377358	0.346021	0.343643
	0.348432
	0.383142

## Sheet: Suppl. Fig. 8B
		FLIM-FRET Measurements using pcDNA-CFP-cGi500-YFP as FRET-based sensor for cGMP 1/Lifetime (ns-1)
		mCherry +DMSO	mCherry +100μM SNAP	mCherry +500μM SNAP	Kcnk5b +DMSO
		0.4095	0.499353	0.579213	0.477783
		0.397614	0.484353	0.593482	0.417362
		0.42517	0.488675	0.613234	0.387447
		0.429185	0.496998	0.631038	0.429185
		0.433463	0.510261	0.6349	0.434405
		0.419463	0.521548	0.676311	0.445038
		0.429553	0.52516		0.431593
		0.444642			0.436872
		0.432339			0.417362
		0.42337			0.481232

## Sheet: Suppl. Fig. 8D
											Raw data	Patch reads				Conversions =
			Kcnk5b			Kcnk5bMut										Current reads/Ccell (capacitance)*1000000000000
			Conductance (pA/pF)			Conductance (pA/pF)					Kcnk5b
		Voltage (mV)	Average	SEM		Average	SEM					cell 1	cell 2	cell 3
		-100	-2.73979	3.54184		-6.76021	1.27283				Rs (Resistance)	9.183	5.846	6.743		Conversion	Current reads
		-90	-0.212269	3.73568		-6.12948	1.14368				Ccell (Cell Capacitance)	15.76	20.79	18.94			cell 1	cell 2	cell 3
		-80	1.56685	3.89956		-5.49435	1.00364				Voltage (mV)	Current reads				Voltage (mV)	M9-26	N9-29	O9-29		average	sem
		-70	2.84314	3.72368		-5.03294	0.851955				-100	-1.32128e-10	7.8781e-11	6.8657e-11		-100	-8.38376	3.78937	-3.62497		-2.73979	3.54184
		-60	5.0581	3.52649		-4.8785	1.05526				-90	-1.20093e-10	9.00956e-11	5.01854e-11		-90	-7.62011	4.3336	2.6497		-0.212269	3.73568
		-50	8.58126	3.75208		-3.91967	0.623396				-80	-9.82206e-11	1.13642e-10	1.03538e-10		-80	-6.23227	5.46619	5.46663		1.56685	3.89956
		-40	11.6813	3.24745		-3.46656	0.524172				-70	-7.25052e-11	1.40671e-10	1.20529e-10		-70	-4.60058	6.76628	6.36373		2.84314	3.72368
		-30	15.9655	2.93239		-3.06951	0.465019				-60	-3.14127e-11	1.8124e-10	1.6004e-10		-60	-1.99319	8.71765	8.44984		5.0581	3.52649
		-20	23.2834	2.15926		-2.53936	0.394778				-50	1.79132e-11	2.38807e-10	2.48503e-10		-50	1.13662	11.4866	13.1205		8.58126	3.75208
		-10	30.8965	0.450709		-2.09008	0.33582				-40	8.17949e-11	3.06415e-10	2.86283e-10		-40	5.19003	14.7386	15.1153		11.6813	3.24745
		0	41.2315	2.0583		-1.79187	0.422898				-30	1.59429e-10	4.00346e-10	3.50843e-10		-30	10.1161	19.2567	18.5239		15.9655	2.93238
		10	51.6548	4.50678		-1.03162	0.191287				-20	2.9897e-10	5.25052e-10	4.85338e-10		-20	18.9702	25.255	25.625		23.2834	2.15926
		20	62.5049	7.85318		-0.28374	0.0305238				-10	4.75258e-10	6.40783e-10	6.00623e-10		-10	30.156	30.8217	31.7119		30.8965	0.450709
		30	74.0621	12.3301		0.30076	0.0324559				0	7.11658e-10	7.94029e-10	7.64148e-10		0	45.156	38.1928	40.3457		41.2315	2.0583
		40	88.9189	18.5715		0.805205	0.12271				10	9.53678e-10	9.51787e-10	9.21823e-10		10	60.5126	45.781	48.6707		51.6548	4.50678
		50	106.218	23.1363		1.51649	0.46307				20	1.23233e-09	1.12295e-09	1.04752e-09		20	78.1935	54.0139	55.3073		62.5049	7.85318
		60	120.396	29.746		1.95717	0.494878				30	1.55568e-09	1.29711e-09	1.15694e-09		30	98.7107	62.3911	61.0845		74.0621	12.3301
		70	129.919	34.0333		2.75954	0.574166				40	1.98608e-09	1.43127e-09	1.36164e-09		40	126.02	68.8442	71.8923		88.9189	18.5716
											50	2.4025e-09	1.68976e-09	1.60867e-09		50	152.443	81.2775	84.9351		106.218	23.1363
											60	2.83346e-09	1.82345e-09	1.77455e-09		60	179.788	87.708	93.6932		120.396	29.746
											70	3.11946e-09	1.94701e-09	1.85933e-09		70	197.935	93.6513	98.1695		129.919	34.0333
											Kcnk5bMut
												cell 1	cell 2	cell 3
											Rs (Resistance)	13.27	8.785	10.27		Conversion	Current reads
											Ccell (Cell Capacitance)	16.55	17.14	15.32			cell 1	cell 2	cell 3
											Voltage (mV)	Current reads				Voltage (mV)	M36-M53	N36-N53	O36-O53		average	sem
											-100	-1.52585e-10	-8.50413e-11	-6.30734e-11		-100	-9.21964	-4.96157	-6.09942		-6.76021	1.27283
											-90	-1.38138e-10	-7.77144e-11	-5.57975e-11		-90	-8.34671	-4.5341	-5.50765		-6.12948	1.14368
											-80	-1.23102e-10	-7.00826e-11	-5.11846e-11		-80	-7.43819	-4.08883	-4.95602		-5.49435	1.00364
											-70	-1.09806e-10	-6.39153e-11	-5.88466e-11		-70	-6.6348	-3.72901	-4.73499		-5.03294	0.851955
											-60	-1.13871e-10	-5.65418e-11	-4.8863e-11		-60	-6.88042	-3.29882	-4.45625		-4.8785	1.05526
											-50	-8.41684e-11	-5.06379e-11	-4.7748e-11		-50	-5.0857	-2.95437	-3.71893		-3.91967	0.623396
											-40	-7.32903e-11	-4.49845e-11	-4.57643e-11		-40	-4.42842	-2.62453	-3.34673		-3.46656	0.524172
											-30	-6.47056e-11	-3.94912e-11	-4.24463e-11		-30	-3.9097	-2.30404	-2.9948		-3.06951	0.465019
											-20	-5.37913e-11	-3.23321e-11	-3.53576e-11		-20	-3.25023	-1.88635	-2.48151		-2.53936	0.394778
											-10	-4.44576e-11	-2.61235e-11	-3.01675e-11		-10	-2.68626	-1.52412	-2.05985		-2.09008	0.33582
											0	-4.21539e-11	-1.85873e-11	-2.45249e-11		0	-2.54706	-1.08444	-1.74412		-1.79187	0.422898
											10	-2.10486e-11	-1.12035e-11	-2.42476e-11		10	-1.27182	-0.653646	-1.1694		-1.03162	0.191287
											20	-4.99483e-12	-3.84298e-12	-6.88841e-12		20	-0.301802	-0.224211	-0.325216		-0.283743	0.0305238
											30	5.73089e-12	4.078e-12	5.669e-12		30	0.346277	0.237923	0.31808		0.30076	0.0324559
											40	1.73115e-11	1.24406e-11	2.4437e-12		40	1.04601	0.725823	0.643782		0.805205	0.12271
											50	3.97831e-11	1.44499e-11	1.01264e-11		50	2.40381	0.843051	1.30262		1.51649	0.46307
											60	4.78383e-11	2.06586e-11	1.88633e-11		60	2.89053	1.20529	1.7757		1.95717	0.494878
											70	6.37423e-11	3.26653e-11	2.76785e-11		70	3.8515	1.90579	2.52133		2.75954	0.574166

## Sheet: Suppl. Fig. 8E
		Fold change in SHH Expression in HEK293 qRT-PCR
		GFP +DMSO	Kcnk5b +DMSO	Kcnk5b +50μM Verapamil	Kcnk5b +100μM Verapamil	Kcnk5b +140μM Verapamil	Kcnk5b +200μM Verapamil
		1	2.41082	3.21669	2.88736	1.99781	1.6644
		1	1.78462	2.87131	3.17998	1.96962	2.52269
		1	1.78262	2.70225	2.5182	2.34416	1.72908
		1	3.15556	2.1887	1.60064	1.30943	1.93198
		1	2.53459	2.31143	2.37949	1.16477	1.46207
		1	1.9007	2.54988	1.4237	1.53381	1.75133
		1	3.33083	2.03013	2.50749	3.26569	2.27759
		1	3.62437	2.54626	2.8905	1.91029	2.3584
		1	2.11947	3.28625	2.26598	4.40067	3.69649
			mcherry DMSO	CT	CT mean	delta CT mean		KC-mcherry DMSO	CT	CT mean	delta CT mean	delta CT	minus delta CT	fold change		KC-mcherry 50uM	CT	CT mean	delta CT mean	delta CT	minus delta CT	fold change		KC-mCherry 100uM	CT	CT mean	delta CT mean	delta CT	minus delta CT	fold change		KC-mCherry 140uM	CT	CT mean	delta CT mean	delta CT	minus delta CT	fold change		KC-mCherry 200uM	CT	CT mean	delta CT mean	delta CT	minus delta CT	fold change
		Experiment 1	gapdh	14.6991	14.6818				14.2683	14.2293							14.433	14.4863							14.4844	14.5288							14.4	14.4423							14.3305	14.2818
				14.571					14.1992								14.476								14.669								14.625								14.3165
				14.7752					14.2206								14.55								14.433								14.302								14.1985
			shh	30.5393	30.4323	15.7506			28.7104	29.0002	14.481	-1.26953	1.26953	2.41083			28.5513	28.6897	14.0649	-1.68564	1.68564	3.21683			28.7496	28.769	14.2208	-1.52975	1.52975	2.88736			29.1946	29.1245	14.7522	-0.998316	0.998316	1.99767			29.2974	29.0791	15.0156	-0.735002	0.735002	1.6644
				30.5137					29.1443		14.9149	-0.835621	0.835621	1.78462			28.7151		14.2288	-1.52177	1.52177	2.87143			28.6103		14.0815	-1.66902	1.66902	3.17997			29.2151		14.7727	-0.977814	0.977814	1.96948			28.6974		14.4156	-1.33496	1.33496	2.52269
				30.2441					29.1459		14.9166	-0.833997	0.833997	1.78262			28.8027		14.3163	-1.43422	1.43422	2.70236			28.947		14.4182	-1.33239	1.33239	2.5182			28.9639		14.5216	-1.22897	1.22897	2.34399			29.2424		14.9606	-0.790006	0.790006	1.72908
		Experiment 2	gapdh	13.3185	13.2703				13.1676	13.1224							13.2983	13.2637							12.9922	12.8143							12.2417	12.2096							12.8215	12.655
				13.2985					13.1202								13.3902								12.8468								12.2742								12.6315
				13.1939					13.0794								13.1026								12.6037								12.1127								12.512
			shh	31.7407	31.6243	18.4704			29.9349	30.2841	16.8125	-1.6579	1.6579	3.15556			30.604	30.5043	17.3403	-1.13007	1.13007	2.1887			30.606	30.4717	17.7917	-0.67865	0.67865	1.60064			30.291	30.2713	18.0815	-0.38894	0.38894	1.30943			30.1753	30.3566	17.5203	-0.950083	0.950083	1.93198
				31.5703					30.251		17.1286	-1.34175	1.34175	2.53459			30.5253		17.2616	-1.20878	1.20878	2.31143			30.034		17.2197	-1.25065	1.25065	2.37949			30.4599		18.2504	-0.220046	0.220046	1.16477			30.5774		17.9224	-0.54801	0.54801	1.46207
				31.5617					30.6662		17.5439	-0.926532	0.926532	1.9007			30.3836		17.12	-1.35043	1.35043	2.54988			30.775		17.9607	-0.50965	0.50965	1.4237			30.0628		17.8533	-0.617122	0.617122	1.53381			30.3169		17.6619	-0.808453	0.808453	1.75133
		Experiment 3	gapdh	14.0861	13.9987				13.8844	13.8014							13.0834	13.0778							13.9276	13.6278							14.24	14.0845							13.8161	13.6049
				14.0294					13.6761								13.1958								13.5405								14.0817								13.6674
				13.8806					13.8435								12.9544								13.4154								13.9317								13.3313
			shh	31.6702	32.6144	18.6157			30.6812	30.858	16.8799	-1.73588	1.73588	3.33083			30.672	30.3315	17.5942	-1.02157	1.02157	2.03013			30.9173	30.8977	17.2895	-1.32624	1.32624	2.50749			30.9928	31.1073	16.9084	-1.70739	1.70739	3.26569			31.0332	30.7835	17.4282	-1.18751	1.18751	2.27759
				32.4103					30.5594		16.758	-1.85773	1.85773	3.62437			30.3452		17.2674	-1.34838	1.34838	2.54626			30.7122		17.0844	-1.53132	1.53132	2.8905			31.7664		17.682	-0.933794	0.933794	1.91029			30.9829		17.3779	-1.23781	1.23781	2.3584
				33.7628					31.3334		17.532	-1.08371	1.08371	2.11947			29.9771		16.8993	-1.71644	1.71644	3.28625			31.0634		17.4356	-1.18014	1.18014	2.26598			30.5625		16.478	-2.13772	2.13772	4.40067			30.3345		16.7296	-1.88615	1.88615	3.69649

## Sheet: Suppl. Fig. 8F
		Fold change in SHH Expression in HEK293 qRT-PCR
		GFP +DMSO	Kcnk5b-GFP +DMSO	Kcnk5b-GFP +3.5uM Mibefradil	Kcnk5b-GFP +5uM Mibefradil
		1	2.03652	2.42534	3.29266
		1	1.53316	2.23895	2.9454
		1	1.85293	2.36995	2.89167
		1	3.10274	3.97874	4.32106
		1	3.21387	3.72958	2.46408
		1	2.43511	4.01107	7.85828
			GFP DMSO	CT	CT mean	delta CT mean		KC-GFP DMSO	CT	CT mean	delta CT mean	delta CT	minus delta CT	fold change		KC-GFP 3.5uM	CT	CT mean	delta CT mean	delta CT	minus delta CT	fold change		KC-GFP 5uM	CT	CT mean	delta CT mean	delta CT	minus delta CT	fold change
		Expriment 1	gapdh	14.3585	14.3366				13.5861	13.4852							13.6881	13.631							13.8013	13.7157
				14.3388					13.4487								13.6635								13.8815
				14.3126					13.4207								13.5413								13.4644
			shh	32.6197	32.796	18.4594			30.9184	31.1004	17.4333	-1.02611	1.02611	2.03652			30.8122	30.8618	17.1812	-1.27819	1.27819	2.42534			30.4559	30.5719	16.7402	-1.71925	1.71925	3.29266
				32.9244					31.3281		17.8429	-0.616506	0.616506	1.53316			30.9276		17.2966	-1.16282	1.16282	2.23895			30.6167		16.9009	-1.55846	1.55846	2.9454
				32.844					31.0548		17.5696	-0.889806	0.889806	1.85293			30.8455		17.2146	-1.24486	1.24486	2.36995			30.6432		16.9275	-1.5319	1.5319	2.89167
		Expriment 2	gapdh	13.844	13.7583				14.0305	13.7027							13.9969	13.905							13.7206	13.5946
				13.7559					13.7157								13.8475								13.6831
				13.6749					13.3619								13.8706								13.38
			shh	32.2543	31.9173	18.159			30.2282	30.3278	16.5255	-1.63354	1.63354	3.10274			30.0717	30.0989	16.1667	-1.99231	1.99231	3.97874			29.6422	29.6247	16.0476	-2.11138	2.11138	4.32106
				31.5823					30.1774		16.4747	-1.68431	1.68431	3.21387			30.165		16.26	-1.89901	1.89901	3.72958			30.4525		16.858	-1.30105	1.30105	2.46408
				31.9154					30.5778		16.875	-1.28399	1.28399	2.43511			30.06		16.155	-2.00399	2.00399	4.01107			28.7794		15.1848	-2.97421	2.97421	7.85828
