# Supplementary material for: The scale of zebrafish pectoral fin buds is determined by intercellular K+ levels and consequent Ca2+-mediated signaling via retinoic acid regulation of Rcan2 and Kcnk5b
Source: PLoS Biol. 2024 Mar 25;22(3):e3002565. doi: 10.1371/journal.pbio.3002565 (PMC11018282; doi:10.1371/journal.pbio.3002565)
Supplement: S14 Data — (XLSX) [file pbio.3002565.s014.xlsx]

## Sheet: Suppl. Fig. 9A
		Fold Change in SHH Expression in HEK293 Cells qRT-PCR
		mCherry +DMSO	Kcnk5b-mCherry +DMSO	kcnk5b-mCherry +2μM KN-62	kcnk5b-mCherry +3μM KN-62
		1	2.56575	3.44621	3.57309
		1	2.71548	3.0466	3.82616
		1	1.92151	3.59827	2.45531
		1	2.26463	2.43569	0.733482
		1	2.66767	3.07909	2.76025
		1	2.23765	1.95778	3.88482
		kn-62 for hek cells	GFP DMSO	CT	CT mean	delta CT mean		KC-GFP DMSO	CT	CT mean	delta CT mean	delta CT	minus delta CT	fold change		KC-GFP2uM	CT	CT mean	delta CT mean	delta CT	minus delta CT	fold change		KC-GFP3uM	CT	CT mean	delta CT mean	delta CT	minus delta CT	fold change
		Experiment 1	gapdh	14.456	14.341				14.8085	14.6357							14.573	14.4193							14.3179	14.2034
				14.277					14.5584								14.395								14.1947
				14.29					14.5402								14.29								14.0976
			shh	30.6985	30.917	16.576			29.8523	29.9641	15.2166	-1.35938	1.35938	2.56575			29.21	29.2485	14.7907	-1.7853	1.7853	3.44689			28.942	29.0893	14.7386	-1.83739	1.83739	3.57363
				31.0856					29.7705		15.1348	-1.44121	1.44121	2.71549			29.3878		14.9685	-1.60749	1.60749	3.0472			28.843		14.6396	-1.93639	1.93639	3.82747
				30.9669					30.2695		15.6338	-0.942247	0.942247	1.92152			29.1477		14.7284	-1.84759	1.84759	3.59898			29.483		15.2796	-1.29639	1.29639	2.45614
		Experiment 2	gapdh	14.2643	14.1234				13.9359	13.8669							14.6268	14.2196							14.3684	13.9125
				14.0453					13.8953								14.035								13.6593
				14.0605					13.7696								13.9969								13.7098
			shh	31.1459	31.0791	16.9557			29.6434	29.5704	15.7764	-1.17927	1.17927	2.26463			29.891	29.8833	15.6714	-1.28427	1.28427	2.43559			31.3153	29.8763	17.4029	0.447166	-0.447166	0.733482
				30.9244					29.4071		15.5401	-1.41558	1.41558	2.66767			29.553		15.3334	-1.62227	1.62227	3.07859			29.4034		15.4909	-1.4648	1.4648	2.76025
				31.1669					29.6606		15.7937	-1.16199	1.16199	2.23765			30.206		15.9864	-0.969269	0.969269	1.95785			28.9103		14.9979	-1.95785	1.95785	3.88482
